# Supplementary material for: IL-23 signaling regulation of pro-inflammatory T-cell migration uncovered by phosphoproteomics
Source: PLoS Biol. 2020 Mar 23;18(3):e3000646. doi: 10.1371/journal.pbio.3000646 (PMC7117768; doi:10.1371/journal.pbio.3000646)
Supplement: S3 Table — List of 168 phosphosites with significant changes using a multiple t test FDR-5%, presented as in S1 Table. The file includes one tab for p-sites up-regulated, and a second tab for down-regulated p-sites. FDR, false discovery rate; IL-23, Interleukin 23; p-site, phosphorylation site (XLSX) [file pbio.3000646.s003.xlsx]

## Sheet: Upregulated by IL-23
Protein	Protein names	Gene names	Sequence window	Amino acid	Position	ratio_IL-23/Ctrl_Exp.1_linear	ratio_IL-23/Ctrl_Exp.2_linear	ratio_IL-23/Ctrl_Exp.3_linear	ratio_IL-23/Ctrl_AVG_linear	Discovery_FDR-5%	Adjusted P value	N exp.	ratio_IL-23/Ctrl_Exp.1_log2	ratio_IL-23/Ctrl_Exp.2_log2	ratio_IL-23/Ctrl_Exp.3_log2	ratio_IL-23/Ctrl_AVG_log2	MS Intensity	Motifs	GOBP name	GOMF name	GOCC name	KEGG name	Keywords	GOBP	GOMF	GOCC
Q3UHJ0	AP2-associated protein kinase 1	Aak1	FAKLGEGKLPEKLGGSAESLIPGFQPTQGDA	S	729	2.4352	2.34705	2.45169	2.34847	*	< 0.0001	3	1.17054	1.23085	1.29378	1.23172	1284600	Casein kinase II substrate motif;PKA kinase substrate motif	biological regulation;cellular component organization;cellular component organization or biogenesis;cellular macromolecule metabolic process;cellular membrane organization;cellular metabolic process;cellular process;cellular protein metabolic process;endocytosis;establishment of localization;macromolecule metabolic process;macromolecule modification;membrane invagination;membrane organization;met…	adenyl nucleotide binding;adenyl ribonucleotide binding;AP-2 adaptor complex binding;ATP binding;binding;catalytic activity;kinase activity;Notch binding;nucleotide binding;phosphotransferase activity, alcohol group as acceptor;protein binding;protein complex binding;protein kinase activity;protein serine/threonine kinase activity;purine nucleotide binding;purine ribonucleoside triphosphate bindi…	axon part;cell leading edge;cell part;cell projection part;clathrin-coated vesicle;coated pit;coated vesicle;cytoplasmic membrane-bounded vesicle;cytoplasmic part;cytoplasmic vesicle;extrinsic to membrane;extrinsic to plasma membrane;intracellular membrane-bounded organelle;intracellular organelle;intracellular part;membrane part;membrane-bounded organelle;membrane-bounded vesicle;organelle;plasm…		Alternativesplicing;ATP-binding;Cellmembrane;Coatedpit;Completeproteome;Endocytosis;Kinase;Membrane;Nucleotide-binding;Phosphoprotein;Referenceproteome;Serine/threonine-proteinkinase;Transferase	GO:0006464;GO:0006468;GO:0006793;GO:0006796;GO:0006810;GO:0006897;GO:0008152;GO:0008593;GO:0009966;GO:0009967;GO:0009987;GO:0010324;GO:0010468;GO:0010608;GO:0010646;GO:0010647;GO:0016043;GO:0016044;GO:0016192;GO:0016310;GO:0019222;GO:0019538;GO:0023051;GO:0023056;GO:0030100;GO:0031647;GO:0032879;GO:0032880;GO:0043170;GO:0043412;GO:0044237;GO:0044238;GO:0044260;GO:0044267;GO:0045747;GO:0046777;GO:…	GO:0000166;GO:0003824;GO:0004672;GO:0004674;GO:0005102;GO:0005112;GO:0005488;GO:0005515;GO:0005524;GO:0016301;GO:0016740;GO:0016772;GO:0016773;GO:0017076;GO:0030554;GO:0032403;GO:0032553;GO:0032555;GO:0032559;GO:0035612;GO:0035639	GO:0005905;GO:0016023;GO:0019897;GO:0019898;GO:0030135;GO:0030136;GO:0031252;GO:0031410;GO:0031982;GO:0031988;GO:0033267;GO:0043195;GO:0043226;GO:0043227;GO:0043229;GO:0043231;GO:0044424;GO:0044425;GO:0044444;GO:0044456;GO:0044459;GO:0044463;GO:0044464
Q3THG9	Alanyl-tRNA editing protein Aarsd1	Aarsd1	TRRGAQADHFTESPLSPGSQVQVRVDWERRF	S	88	2.0107	2.49815	2.00863	2.10491	*	0.00197137	3	0.894197	1.32086	1.00621	1.07376	5455800	Casein kinase II substrate motif;ERK1,2 kinase substrate motif;GSK-3, ERK1, ERK2, CDK5 substrate motif;WW domain binding motif	alanyl-tRNA aminoacylation;amine metabolic process;amino acid activation;carboxylic acid metabolic process;cellular amine metabolic process;cellular amino acid metabolic process;cellular ketone metabolic process;cellular macromolecule metabolic process;cellular metabolic process;cellular nitrogen compound metabolic process;cellular process;macromolecule metabolic process;metabolic process;ncRNA m…	adenyl nucleotide binding;adenyl ribonucleotide binding;alanine-tRNA ligase activity;aminoacyl-tRNA ligase activity;ATP binding;binding;catalytic activity;cation binding;ion binding;ligase activity;ligase activity, forming aminoacyl-tRNA and related compounds;ligase activity, forming carbon-oxygen bonds;metal ion binding;nucleic acid binding;nucleotide binding;purine nucleotide binding;purine rib…	cell part;cytoplasm;intracellular part		Completeproteome;Cytoplasm;Metal-binding;Phosphoprotein;Proteinbiosynthesis;Referenceproteome;Zinc	GO:0006082;GO:0006139;GO:0006399;GO:0006418;GO:0006419;GO:0006520;GO:0006807;GO:0008152;GO:0009308;GO:0009987;GO:0016070;GO:0019752;GO:0034641;GO:0034660;GO:0042180;GO:0043038;GO:0043039;GO:0043170;GO:0043436;GO:0044106;GO:0044237;GO:0044238;GO:0044260;GO:0044281;GO:0090304	GO:0000166;GO:0003676;GO:0003824;GO:0004812;GO:0004813;GO:0005488;GO:0005524;GO:0016874;GO:0016875;GO:0016876;GO:0017076;GO:0030554;GO:0032553;GO:0032555;GO:0032559;GO:0035639;GO:0043167;GO:0043169;GO:0046872	GO:0005737;GO:0044424;GO:0044464
P59672	Ankyrin repeat and SAM domain-containing protein 1A	Anks1a	PSFASEWDEIEKIMSSIGEGIDFSQEQQKIS	S	693	1.9947	1.64897	1.80286	1.76317	*	0.00123075	3	0.882671	0.721562	0.850285	0.818173	1500200	Casein kinase II substrate motif;MDC1 BRCT domain binding motif;PKA kinase substrate motif;Plk1 PBD domain binding motif	biological regulation;cell maturation;cell migration;cell motility;cell surface receptor linked signaling pathway;cellular component movement;cellular developmental process;cellular process;cellular response to stimulus;developmental maturation;developmental process;enzyme linked receptor protein signaling pathway;ephrin receptor signaling pathway;locomotion;neuron maturation;neuron remodeling;re…		cell part;cell projection;cytoplasm;intracellular membrane-bounded organelle;intracellular organelle;intracellular part;membrane-bounded organelle;neuron projection;nucleus;organelle		Acetylation;Alternativesplicing;ANKrepeat;Cellprojection;Completeproteome;Cytoplasm;Phosphoprotein;Referenceproteome;Repeat	GO:0006928;GO:0006929;GO:0007165;GO:0007166;GO:0007167;GO:0007169;GO:0009987;GO:0016322;GO:0016477;GO:0021700;GO:0032502;GO:0040011;GO:0042551;GO:0048013;GO:0048469;GO:0048869;GO:0048870;GO:0050789;GO:0050794;GO:0050896;GO:0051716;GO:0065007		GO:0005634;GO:0005737;GO:0042995;GO:0043005;GO:0043226;GO:0043227;GO:0043229;GO:0043231;GO:0044424;GO:0044464
P59672	Ankyrin repeat and SAM domain-containing protein 1A	Anks1a	SPSFASEWDEIEKIMSSIGEGIDFSQEQQKI	S	692	1.9947	2.43405	2.38758	2.20462	*	0.000798987	3	0.882671	1.28336	1.25555	1.14053	1662400	Calmodulin-dependent protein kinase II substrate motif;Chk1 kinase substrate motif;PKA kinase substrate motif;PKC kinase substrate motif	biological regulation;cell maturation;cell migration;cell motility;cell surface receptor linked signaling pathway;cellular component movement;cellular developmental process;cellular process;cellular response to stimulus;developmental maturation;developmental process;enzyme linked receptor protein signaling pathway;ephrin receptor signaling pathway;locomotion;neuron maturation;neuron remodeling;re…		cell part;cell projection;cytoplasm;intracellular membrane-bounded organelle;intracellular organelle;intracellular part;membrane-bounded organelle;neuron projection;nucleus;organelle		Acetylation;Alternativesplicing;ANKrepeat;Cellprojection;Completeproteome;Cytoplasm;Phosphoprotein;Referenceproteome;Repeat	GO:0006928;GO:0006929;GO:0007165;GO:0007166;GO:0007167;GO:0007169;GO:0009987;GO:0016322;GO:0016477;GO:0021700;GO:0032502;GO:0040011;GO:0042551;GO:0048013;GO:0048469;GO:0048869;GO:0048870;GO:0050789;GO:0050794;GO:0050896;GO:0051716;GO:0065007		GO:0005634;GO:0005737;GO:0042995;GO:0043005;GO:0043226;GO:0043227;GO:0043229;GO:0043231;GO:0044424;GO:0044464
Q3UPH7	Rho guanine nucleotide exchange factor 40	Arhgef40	QELERRIQQQLGEEASPRSHRRRRADSASSA	S	959	1.6173	1.53437	1.6784	1.56729	*	0.00012747	3	0.580087	0.617649	0.747087	0.648274	11109000	Casein kinase I substrate motif;Casein kinase II substrate motif;elF2 alpha kinase substrate motif;ERK1,2 kinase substrate motif;Growth associated histone HI kinase substrate motif;GSK-3, ERK1, ERK2, CDK5 substrate motif;PKA kinase substrate motif;PKC kinase substrate motif;WW domain binding motif	biological regulation;regulation of biological process;regulation of cellular process;regulation of Ras protein signal transduction;regulation of response to stimulus;regulation of Rho protein signal transduction;regulation of signal transduction;regulation of signaling;regulation of small GTPase mediated signal transduction	binding;enzyme regulator activity;GTPase regulator activity;guanyl-nucleotide exchange factor activity;lipid binding;nucleoside-triphosphatase regulator activity;phospholipid binding;Ras guanyl-nucleotide exchange factor activity;Rho guanyl-nucleotide exchange factor activity;small GTPase regulator activity	cell part;cytoplasm;intracellular part		Alternativesplicing;Coiledcoil;Completeproteome;Cytoplasm;Guanine-nucleotidereleasingfactor;Phosphoprotein;Referenceproteome	GO:0009966;GO:0023051;GO:0035023;GO:0046578;GO:0048583;GO:0050789;GO:0050794;GO:0051056;GO:0065007	GO:0005083;GO:0005085;GO:0005088;GO:0005089;GO:0005488;GO:0005543;GO:0008289;GO:0030234;GO:0030695;GO:0060589	GO:0005737;GO:0044424;GO:0044464
Q8BWG8	Beta-arrestin-1	Arrb1	RLKGMKDDKDEEDDGTGSPHLNNR_______	T	410	1.2811	1.39669	1.42903	1.33205	*	0.00119577	3	0.243883	0.482013	0.515034	0.413643	16658000	Casein kinase I substrate motif	actin cytoskeleton organization;actin filament bundle assembly;actin filament organization;actin filament-based process;biological regulation;biosynthetic process;catabolic process;cellular biosynthetic process;cellular catabolic process;cellular component assembly;cellular component assembly at cellular level;cellular component organization;cellular component organization at cellular level;cellu…	binding;caspase inhibitor activity;caspase regulator activity;cysteine-type endopeptidase inhibitor activity;DNA binding;endopeptidase inhibitor activity;endopeptidase regulator activity;enzyme activator activity;enzyme binding;enzyme inhibitor activity;enzyme regulator activity;GTPase activator activity;GTPase regulator activity;kinase binding;mitogen-activated protein kinase kinase binding;nucl…	cell part;cell projection;chromatin;chromosomal part;coated pit;cytoplasmic membrane-bounded vesicle;cytoplasmic part;cytoplasmic vesicle;cytosol;intracellular membrane-bounded organelle;intracellular organelle;intracellular organelle part;intracellular part;membrane;membrane part;membrane-bounded organelle;membrane-bounded vesicle;nucleus;organelle;organelle part;plasma membrane;pseudopodium;ves…	Chemokine signaling pathway;Endocytosis;MAPK signaling pathway;Phototransduction	Alternativesplicing;Cellmembrane;Cellprojection;Coatedpit;Completeproteome;Cytoplasm;Cytoplasmicvesicle;Membrane;Nucleus;Phosphoprotein;Proteintransport;Referenceproteome;Signaltransductioninhibitor;Transcription;Transcriptionregulation;Transport;Ublconjugation	GO:0001817;GO:0001818;GO:0001932;GO:0001934;GO:0002031;GO:0002791;GO:0002793;GO:0006139;GO:0006351;GO:0006355;GO:0006357;GO:0006366;GO:0006464;GO:0006508;GO:0006511;GO:0006807;GO:0006810;GO:0006897;GO:0006898;GO:0006996;GO:0007010;GO:0007015;GO:0007165;GO:0007602;GO:0008152;GO:0008277;GO:0009056;GO:0009057;GO:0009058;GO:0009059;GO:0009314;GO:0009416;GO:0009581;GO:0009582;GO:0009583;GO:0009605;GO:…	GO:0000975;GO:0001067;GO:0003676;GO:0003677;GO:0004857;GO:0004866;GO:0004869;GO:0005096;GO:0005488;GO:0005515;GO:0008047;GO:0019899;GO:0019900;GO:0019901;GO:0030234;GO:0030414;GO:0030695;GO:0031434;GO:0043027;GO:0043028;GO:0044212;GO:0060589;GO:0061134;GO:0061135	GO:0000785;GO:0005634;GO:0005829;GO:0005886;GO:0005905;GO:0016020;GO:0016023;GO:0031143;GO:0031410;GO:0031982;GO:0031988;GO:0042995;GO:0043226;GO:0043227;GO:0043229;GO:0043231;GO:0044422;GO:0044424;GO:0044425;GO:0044427;GO:0044444;GO:0044446;GO:0044464
Q6Q477	Calcium-transporting ATPase	Atp2b4	AKTQDGVALEIQPLNSQEGLDSEDKEKKIAR	S	329	1.6118	1.87156	1.88808	1.73963	*	0.000905807	3	0.575172	0.904243	0.91692	0.798778	7136600	ATM kinase substrate motif;Casein kinase II substrate motif;DNA dependent Protein kinase substrate motif	calcium ion transport;cation transport;divalent inorganic cation transport;divalent metal ion transport;establishment of localization;ion transport;metal ion transport;transport	active transmembrane transporter activity;adenyl nucleotide binding;adenyl ribonucleotide binding;ATP binding;ATPase activity;ATPase activity, coupled;ATPase activity, coupled to movement of substances;ATPase activity, coupled to transmembrane movement of ions;ATPase activity, coupled to transmembrane movement of ions, phosphorylative mechanism;ATPase activity, coupled to transmembrane movement o…	cell part;integral to membrane;integral to plasma membrane;intrinsic to membrane;intrinsic to plasma membrane;membrane part;plasma membrane part	Calcium signaling pathway;Pancreatic secretion;Salivary secretion	ATP-binding;Completeproteome;Hydrolase;Membrane;Nucleotide-binding;Phosphoprotein;Referenceproteome;Transmembrane;Transmembranehelix	GO:0006810;GO:0006811;GO:0006812;GO:0006816;GO:0030001;GO:0051234;GO:0070838;GO:0072511	GO:0000166;GO:0003824;GO:0005215;GO:0005388;GO:0005488;GO:0005524;GO:0008324;GO:0015075;GO:0015085;GO:0015399;GO:0015405;GO:0015662;GO:0016462;GO:0016787;GO:0016817;GO:0016818;GO:0016820;GO:0016887;GO:0017076;GO:0017111;GO:0019829;GO:0022804;GO:0022857;GO:0022890;GO:0022891;GO:0022892;GO:0030554;GO:0032553;GO:0032555;GO:0032559;GO:0035639;GO:0042623;GO:0042625;GO:0042626;GO:0043167;GO:0043169;GO:…	GO:0005887;GO:0016021;GO:0031224;GO:0031226;GO:0044425;GO:0044459;GO:0044464
Q61687	Transcriptional regulator ATRX	Atrx	RKELFVKLTPVSLSNSPIKGVDCQEVSQEKN	S	590	2.2541	2.87867	2.8442	2.57426	*	0.00121359	3	1.05905	1.5254	1.50802	1.36416	5816000	Cdc2 kinase substrate motif;CDK kinase substrate motif;CDK1,2,4,6 kinase substrate motif;ERK1,2 kinase substrate motif;GSK-3, ERK1, ERK2, CDK5 substrate motif;MAPKAPK2 kinase substrate motif;WW domain binding motif	anatomical structure development;cellular macromolecule metabolic process;cellular metabolic process;cellular nitrogen compound metabolic process;cellular process;cellular response to stimulus;cellular response to stress;developmental process;DNA metabolic process;DNA repair;forebrain development;macromolecule metabolic process;metabolic process;nitrogen compound metabolic process;nucleic acid me…	adenyl nucleotide binding;adenyl ribonucleotide binding;ATP binding;binding;catalytic activity;cation binding;chromatin binding;DNA binding;helicase activity;hydrolase activity;hydrolase activity, acting on acid anhydrides;hydrolase activity, acting on acid anhydrides, in phosphorus-containing anhydrides;ion binding;metal ion binding;nucleic acid binding;nucleoside-triphosphatase activity;nucleot…	cell part;chromatin;chromosomal part;chromosome;heterochromatin;intracellular non-membrane-bounded organelle;intracellular organelle;intracellular organelle part;intracellular part;non-membrane-bounded organelle;nuclear chromosome;nuclear part;organelle;organelle part		ATP-binding;Completeproteome;DNA-binding;DNAdamage;DNArepair;Helicase;Hydrolase;Metal-binding;Nucleotide-binding;Nucleus;Phosphoprotein;Referenceproteome;Zinc;Zinc-finger	GO:0006139;GO:0006259;GO:0006281;GO:0006807;GO:0006950;GO:0006974;GO:0008152;GO:0009987;GO:0030900;GO:0032502;GO:0033554;GO:0034641;GO:0043170;GO:0044237;GO:0044238;GO:0044260;GO:0048856;GO:0050896;GO:0051716;GO:0090304	GO:0000166;GO:0003676;GO:0003677;GO:0003682;GO:0003824;GO:0004386;GO:0005488;GO:0005524;GO:0008270;GO:0016462;GO:0016787;GO:0016817;GO:0016818;GO:0017076;GO:0017111;GO:0030554;GO:0032553;GO:0032555;GO:0032559;GO:0035639;GO:0043167;GO:0043169;GO:0046872;GO:0046914	GO:0000228;GO:0000785;GO:0000792;GO:0005694;GO:0043226;GO:0043228;GO:0043229;GO:0043232;GO:0044422;GO:0044424;GO:0044427;GO:0044428;GO:0044446;GO:0044464
Q7TQH0	Ataxin-2-like protein	Atxn2l	EEKHSAVQRQGSGRESPSLVSREGKYIPLPQ	S	337	1.7058	1.51361	1.49501	1.52806	*	0.0010593	3	0.656948	0.597991	0.580158	0.611699	136750000	b-Adrenergic Receptor kinase substrate motif;Casein kinase II substrate motif;ERK1,2 kinase substrate motif;GSK-3, ERK1, ERK2, CDK5 substrate motif;MAPKAPK2 kinase substrate motif;PKA kinase substrate motif;PKC kinase substrate motif;WW domain binding motif	biological regulation;cellular component assembly;cellular component assembly at cellular level;cellular component organization;cellular component organization at cellular level;cellular component organization or biogenesis;cellular component organization or biogenesis at cellular level;cellular macromolecular complex assembly;cellular macromolecular complex subunit organization;cellular process;…		cell part;cytoplasmic part;intracellular non-membrane-bounded organelle;intracellular organelle;intracellular organelle part;intracellular part;macromolecular complex;membrane;non-membrane-bounded organelle;nuclear body;nuclear part;nuclear speck;nucleoplasm part;organelle;organelle part;ribonucleoprotein complex;RNA granule;stress granule		Acetylation;Alternativesplicing;Completeproteome;Membrane;Methylation;Phosphoprotein;Referenceproteome	GO:0009987;GO:0010603;GO:0016043;GO:0022607;GO:0022618;GO:0034063;GO:0034621;GO:0034622;GO:0043933;GO:0044087;GO:0050789;GO:0050794;GO:0051128;GO:0065003;GO:0065007;GO:0071826;GO:0071840;GO:0071841;GO:0071842;GO:0071844		GO:0010494;GO:0016020;GO:0016604;GO:0016607;GO:0030529;GO:0032991;GO:0035770;GO:0043226;GO:0043228;GO:0043229;GO:0043232;GO:0044422;GO:0044424;GO:0044428;GO:0044444;GO:0044446;GO:0044451;GO:0044464
Q99PV8	B-cell lymphoma/leukemia 11B	Bcl11b	MDFSRRLRELAGNSSTPPPVSPGRGNPMHRL	T	376	1.2324	1.20766	1.21245	1.18594	*	< 0.0001	3	0.18797	0.272216	0.27792	0.246036	37274000	GSK-3, ERK1, ERK2, CDK5 substrate motif;MDC1 BRCT domain binding motif;Plk1 PBD domain binding motif;WW domain binding motif	alpha-beta T cell activation;alpha-beta T cell differentiation;anatomical structure development;anatomical structure morphogenesis;axon guidance;biological regulation;camera-type eye development;cell activation;cell development;cell differentiation;cell morphogenesis;cell morphogenesis involved in differentiation;cellular component morphogenesis;cellular component organization;cellular component …	binding;cation binding;core promoter proximal region DNA binding;core promoter proximal region sequence-specific DNA binding;DNA binding;ion binding;metal ion binding;nucleic acid binding;nucleic acid binding transcription factor activity;regulatory region DNA binding;regulatory region nucleic acid binding;RNA polymerase II core promoter proximal region sequence-specific DNA binding;RNA polymeras…	cell part;intracellular membrane-bounded organelle;intracellular organelle;intracellular part;membrane-bounded organelle;nucleus;organelle		Acetylation;Alternativesplicing;Completeproteome;Metal-binding;Nucleus;Phosphoprotein;Polymorphism;Referenceproteome;Repeat;Repressor;Transcription;Transcriptionregulation;Ublconjugation;Zinc;Zinc-finger	GO:0000902;GO:0000904;GO:0001654;GO:0001775;GO:0002064;GO:0002200;GO:0002376;GO:0002521;GO:0002562;GO:0002568;GO:0002681;GO:0003334;GO:0003382;GO:0006139;GO:0006259;GO:0006310;GO:0006807;GO:0006935;GO:0007411;GO:0007423;GO:0008152;GO:0008285;GO:0008544;GO:0009605;GO:0009653;GO:0009887;GO:0009888;GO:0009987;GO:0010837;GO:0010941;GO:0016043;GO:0016444;GO:0019216;GO:0019222;GO:0021773;GO:0021879;GO:…	GO:0000975;GO:0000976;GO:0000977;GO:0000978;GO:0000981;GO:0000982;GO:0000987;GO:0001012;GO:0001067;GO:0001071;GO:0001077;GO:0001159;GO:0003676;GO:0003677;GO:0003700;GO:0005488;GO:0008270;GO:0043167;GO:0043169;GO:0043565;GO:0044212;GO:0046872;GO:0046914	GO:0005634;GO:0043226;GO:0043227;GO:0043229;GO:0043231;GO:0044424;GO:0044464
Q8K019	Bcl-2-associated transcription factor 1	Bclaf1	SQEEPKDTFEHDPSESIDEFNKSATSGDIWP	S	198	1.3414	1.33733	1.40111	1.32445	*	< 0.0001	3	0.310239	0.419357	0.486572	0.405389	3434500	b-Adrenergic Receptor kinase substrate motif;Casein kinase II substrate motif	biological regulation;biosynthetic process;cellular biosynthetic process;cellular macromolecule biosynthetic process;cellular macromolecule metabolic process;cellular metabolic process;cellular nitrogen compound metabolic process;cellular process;cellular response to stimulus;cellular response to stress;induction of apoptosis;induction of programmed cell death;macromolecule biosynthetic process;m…	binding;DNA binding;nucleic acid binding	cell part;cytoplasm;intracellular non-membrane-bounded organelle;intracellular organelle;intracellular organelle part;intracellular part;non-membrane-bounded organelle;nuclear part;nucleolus;organelle;organelle part		Acetylation;Alternativesplicing;Completeproteome;Cytoplasm;DNA-binding;Nucleus;Phosphoprotein;Referenceproteome;Repressor;Transcription;Transcriptionregulation	GO:0006139;GO:0006351;GO:0006355;GO:0006807;GO:0006917;GO:0006950;GO:0008152;GO:0009058;GO:0009059;GO:0009889;GO:0009890;GO:0009891;GO:0009892;GO:0009893;GO:0009987;GO:0010468;GO:0010556;GO:0010557;GO:0010558;GO:0010604;GO:0010605;GO:0010628;GO:0010629;GO:0010941;GO:0010942;GO:0012502;GO:0016070;GO:0019219;GO:0019222;GO:0031323;GO:0031324;GO:0031325;GO:0031326;GO:0031327;GO:0031328;GO:0031334;GO:…	GO:0003676;GO:0003677;GO:0005488	GO:0005730;GO:0005737;GO:0043226;GO:0043228;GO:0043229;GO:0043232;GO:0044422;GO:0044424;GO:0044428;GO:0044446;GO:0044464
P30282	G1/S-specific cyclin-D3	Ccnd3	AALRESLREAAQTAPSPVPKAPRGSSSQGPS	S	264	1.1548	1.18818	1.17631	1.14265	*	< 0.0001	3	0.0941425	0.248748	0.234264	0.192385	8204400	DNA dependent Protein kinase substrate motif;ERK1,2 kinase substrate motif;GSK-3, ERK1, ERK2, CDK5 substrate motif;WW domain binding motif	biological regulation;cell activation;cell division;cell proliferation;cellular process;cellular response to stimulus;immune system process;leukocyte activation;leukocyte proliferation;lymphocyte activation;lymphocyte proliferation;mononuclear cell proliferation;positive regulation of biological process;positive regulation of catalytic activity;positive regulation of cell cycle;positive regulatio…	catalytic activity;cyclin-dependent protein kinase activity;kinase activity;phosphotransferase activity, alcohol group as acceptor;protein kinase activity;protein serine/threonine kinase activity;transferase activity;transferase activity, transferring phosphorus-containing groups	cell part;cyclin-dependent protein kinase holoenzyme complex;cytoplasm;intracellular membrane-bounded organelle;intracellular organelle;intracellular part;macromolecular complex;membrane;membrane-bounded organelle;nucleus;organelle;protein complex	Cell cycle;Focal adhesion;Jak-STAT signaling pathway;Measles;p53 signaling pathway;Wnt signaling pathway	Cellcycle;Celldivision;Completeproteome;Cyclin;Cytoplasm;Membrane;Nucleus;Phosphoprotein;Referenceproteome;Ublconjugation	GO:0000079;GO:0001775;GO:0001932;GO:0002376;GO:0007165;GO:0008283;GO:0009987;GO:0019220;GO:0019222;GO:0031323;GO:0031399;GO:0032268;GO:0032943;GO:0033674;GO:0042098;GO:0042110;GO:0042325;GO:0043085;GO:0043549;GO:0044093;GO:0045321;GO:0045737;GO:0045787;GO:0045859;GO:0045860;GO:0046649;GO:0046651;GO:0048518;GO:0048522;GO:0050789;GO:0050790;GO:0050794;GO:0050896;GO:0051174;GO:0051246;GO:0051301;GO:…	GO:0003824;GO:0004672;GO:0004674;GO:0004693;GO:0016301;GO:0016740;GO:0016772;GO:0016773	GO:0000307;GO:0005634;GO:0005737;GO:0016020;GO:0032991;GO:0043226;GO:0043227;GO:0043229;GO:0043231;GO:0043234;GO:0044424;GO:0044464
Q8BGU5	Cyclin-Y	Ccny	CEDKYKDLRKPMRKRSASADNLILPRWSPAI	S	324	1.246	1.25702	1.30269	1.23551	*	0.00010175	3	0.203804	0.330004	0.381497	0.305101	6104700	14-3-3 domain binding motif;Calmodulin-dependent protein kinase II substrate motif;Casein kinase II substrate motif;PKA kinase substrate motif;PKC epsilon kinase substrate motif;PKC kinase substrate motif	biological regulation;cell cycle process;cell division;cell surface receptor linked signaling pathway;cellular process;cellular response to stimulus;G2/M transition of mitotic cell cycle;positive regulation of biological process;positive regulation of catalytic activity;positive regulation of cell cycle;positive regulation of cellular process;positive regulation of cyclin-dependent protein kinase…	cyclin-dependent protein kinase regulator activity;enzyme regulator activity;kinase regulator activity;protein kinase regulator activity	cell part;cyclin-dependent protein kinase holoenzyme complex;cytoplasmic cyclin-dependent protein kinase holoenzyme complex;cytoplasmic part;intracellular membrane-bounded organelle;intracellular organelle;intracellular part;macromolecular complex;membrane;membrane-bounded organelle;nucleus;organelle;plasma membrane;protein complex		Alternativesplicing;Cellcycle;Celldivision;Cellmembrane;Completeproteome;Cyclin;Lipoprotein;Membrane;Myristate;Phosphoprotein;Referenceproteome;Ublconjugation;Wntsignalingpathway	GO:0000079;GO:0000086;GO:0001932;GO:0007165;GO:0007166;GO:0009966;GO:0009987;GO:0016055;GO:0019220;GO:0019222;GO:0022402;GO:0023051;GO:0030111;GO:0031323;GO:0031399;GO:0032268;GO:0033674;GO:0042325;GO:0043085;GO:0043549;GO:0044093;GO:0045737;GO:0045787;GO:0045859;GO:0045860;GO:0048518;GO:0048522;GO:0048583;GO:0050789;GO:0050790;GO:0050794;GO:0050896;GO:0051174;GO:0051246;GO:0051301;GO:0051338;GO:…	GO:0016538;GO:0019207;GO:0019887;GO:0030234	GO:0000307;GO:0000308;GO:0005634;GO:0005886;GO:0016020;GO:0032991;GO:0043226;GO:0043227;GO:0043229;GO:0043231;GO:0043234;GO:0044424;GO:0044444;GO:0044464
Q924A2	Protein capicua homolog	Cic	PEEVLPSPTLQSLATSPRAILGSYRKKRKNS	S	2284	1.3755	1.51365	1.61891	1.46054	*	0.00204338	3	0.346456	0.598036	0.695025	0.546505	4994900	ERK1,2 kinase substrate motif;Growth associated histone HI kinase substrate motif;GSK-3, ERK1, ERK2, CDK5 substrate motif;MAPKAPK2 kinase substrate motif;PKA kinase substrate motif;PKC kinase substrate motif;WW domain binding motif	biological regulation;biosynthetic process;cellular biosynthetic process;cellular macromolecule biosynthetic process;cellular macromolecule metabolic process;cellular metabolic process;cellular nitrogen compound metabolic process;cellular process;macromolecule biosynthetic process;macromolecule metabolic process;metabolic process;nitrogen compound metabolic process;nucleic acid metabolic process;…	binding;DNA binding;nucleic acid binding	cell part;intracellular membrane-bounded organelle;intracellular organelle;intracellular part;membrane-bounded organelle;nucleus;organelle		Alternativesplicing;Completeproteome;DNA-binding;Nucleus;Phosphoprotein;Referenceproteome;Repressor;Transcription;Transcriptionregulation	GO:0006139;GO:0006351;GO:0006355;GO:0006807;GO:0008152;GO:0009058;GO:0009059;GO:0009889;GO:0009987;GO:0010468;GO:0010556;GO:0016070;GO:0019219;GO:0019222;GO:0031323;GO:0031326;GO:0032774;GO:0034641;GO:0034645;GO:0043170;GO:0044237;GO:0044238;GO:0044249;GO:0044260;GO:0050789;GO:0050794;GO:0051171;GO:0051252;GO:0060255;GO:0065007;GO:0080090;GO:0090304;GO:2000112	GO:0003676;GO:0003677;GO:0005488	GO:0005634;GO:0043226;GO:0043227;GO:0043229;GO:0043231;GO:0044424;GO:0044464
Q7TSG2	RNA polymerase II subunit A C-terminal domain phosphatase	Ctdp1	LFPLIDDDTRTHRDNSPAVFPDRHSVLPTAL	S	730	1.2878	1.4277	1.45725	1.35296	*	0.00170773	3	0.251408	0.513691	0.543248	0.436115	1148600	14-3-3 domain binding motif;Calmodulin-dependent protein kinase II substrate motif;ERK1,2 kinase substrate motif;GSK-3, ERK1, ERK2, CDK5 substrate motif;PKA kinase substrate motif;PKC kinase substrate motif;WW domain binding motif	cell cycle process;cell division;cellular macromolecule metabolic process;cellular metabolic process;cellular process;cellular protein metabolic process;dephosphorylation;exit from mitosis;macromolecule metabolic process;macromolecule modification;metabolic process;phosphate-containing compound metabolic process;phosphorus metabolic process;primary metabolic process;protein dephosphorylation;prot…	catalytic activity;CTD phosphatase activity;hydrolase activity;hydrolase activity, acting on ester bonds;phosphatase activity;phosphoprotein phosphatase activity;phosphoric ester hydrolase activity;protein serine/threonine phosphatase activity	actin cytoskeleton;cell part;centrosome;cytoplasm;cytoplasmic part;cytoskeletal part;cytoskeleton;intracellular membrane-bounded organelle;intracellular non-membrane-bounded organelle;intracellular organelle;intracellular organelle part;intracellular part;membrane-bounded organelle;microtubule organizing center;midbody;non-membrane-bounded organelle;nucleus;organelle;organelle part;spindle midzon…		Acetylation;Alternativesplicing;Cellcycle;Celldivision;Completeproteome;Cytoplasm;Cytoskeleton;Hydrolase;Mitosis;Nucleus;Phosphoprotein;Proteinphosphatase;Referenceproteome	GO:0006464;GO:0006470;GO:0006793;GO:0006796;GO:0008152;GO:0009987;GO:0010458;GO:0016311;GO:0019538;GO:0022402;GO:0043170;GO:0043412;GO:0044237;GO:0044238;GO:0044260;GO:0044267;GO:0051301	GO:0003824;GO:0004721;GO:0004722;GO:0008420;GO:0016787;GO:0016788;GO:0016791;GO:0042578	GO:0000922;GO:0005634;GO:0005737;GO:0005813;GO:0005815;GO:0005856;GO:0015629;GO:0030496;GO:0043226;GO:0043227;GO:0043228;GO:0043229;GO:0043231;GO:0043232;GO:0044422;GO:0044424;GO:0044430;GO:0044444;GO:0044446;GO:0044464;GO:0051233
Q3UJB9	Enhancer of mRNA-decapping protein 4	Edc4	DGSLTLNSSSSSLQASPRSLLPGLLPGPADK	S	680	1.8398	1.89541	2.11121	1.89502	*	0.000330584	3	0.766048	0.92251	1.07807	0.92221	10574000	Casein kinase II substrate motif;ERK1,2 kinase substrate motif;Growth associated histone HI kinase substrate motif;GSK-3, ERK1, ERK2, CDK5 substrate motif;MAPKAPK2 kinase substrate motif;PKA kinase substrate motif;PKC kinase substrate motif;WW domain binding motif			cell part;cytoplasmic mRNA processing body;cytoplasmic part;intracellular membrane-bounded organelle;intracellular non-membrane-bounded organelle;intracellular organelle;intracellular part;macromolecular complex;membrane-bounded organelle;non-membrane-bounded organelle;nucleus;organelle;ribonucleoprotein complex;RNA granule	RNA degradation	Acetylation;Alternativesplicing;Coiledcoil;Completeproteome;Cytoplasm;Nucleus;Phosphoprotein;Referenceproteome;Repeat;WDrepeat			GO:0000932;GO:0005634;GO:0030529;GO:0032991;GO:0035770;GO:0043226;GO:0043227;GO:0043228;GO:0043229;GO:0043231;GO:0043232;GO:0044424;GO:0044444;GO:0044464
Q8BG67	Protein EFR3 homolog A	Efr3a	LTVPYVPQVTDEDRLSRRKSIVDTVSIQVDI	S	692	1.5157	1.45524	1.34873	1.40099	*	0.000839241	3	0.486484	0.541261	0.431601	0.486449	13713000	Casein kinase I substrate motif;G protein-coupled receptor kinase 1 substrate motif;GSK3 kinase substrate motif;PKA kinase substrate motif;PKC kinase substrate motif			cell part;intracellular;membrane;plasma membrane		Alternativesplicing;Cellmembrane;Completeproteome;Membrane;Phosphoprotein;Referenceproteome			GO:0005622;GO:0005886;GO:0016020;GO:0044464
Q69ZR9	Protein FAM208A	Fam208a	EIHWKLIPITGGNAGSPEDQHGKHGEKQTPD	S	921	1.3848	1.36071	1.23062	1.28934	*	0.00245015	3	0.356177	0.444355	0.299382	0.366638	5207000	Casein kinase II substrate motif;ERK1,2 kinase substrate motif;GSK-3, ERK1, ERK2, CDK5 substrate motif;Pyruvate dehydrogenase kinase substrate motif;WW domain binding motif					Acetylation;Alternativesplicing;Completeproteome;Phosphoprotein;Referenceproteome
Q3UQN2	F-BAR domain only protein 2	Fcho2	PAVSRHSPVQMNRNSSNEELTKSKPSSLPTE	S	403	1.1801	1.18163	1.12017	1.13024	*	0.00136377	3	0.125409	0.240782	0.163716	0.176635	7883800	14-3-3 domain binding motif;Calmodulin-dependent protein kinase I substrate motif;Calmodulin-dependent protein kinase II substrate motif;Calmodulin-dependent protein kinase IV substrate motif;Casein kinase II substrate motif;Chk1 kinase substrate motif;MDC1 BRCT domain binding motif;PKA kinase substrate motif;PKC kinase substrate motif;Plk1 PBD domain binding motif	cellular component assembly;cellular component assembly at cellular level;cellular component organization;cellular component organization at cellular level;cellular component organization or biogenesis;cellular component organization or biogenesis at cellular level;cellular localization;cellular macromolecular complex assembly;cellular macromolecular complex subunit organization;cellular macromol…	binding;lipid binding;phosphatidylinositol binding;phosphatidylinositol-4,5-bisphosphate binding;phosphatidylserine binding;phospholipid binding	cell part;clathrin-coated vesicle;coated pit;coated vesicle;cytoplasmic membrane-bounded vesicle;cytoplasmic part;cytoplasmic vesicle;intracellular membrane-bounded organelle;intracellular organelle;intracellular part;membrane;membrane part;membrane-bounded organelle;membrane-bounded vesicle;organelle;plasma membrane;vesicle		Alternativesplicing;Coatedpit;Coiledcoil;Completeproteome;Disulfidebond;Endocytosis;Membrane;Phosphoprotein;Referenceproteome;Ublconjugation	GO:0006461;GO:0006810;GO:0006897;GO:0006898;GO:0006901;GO:0006996;GO:0007009;GO:0008104;GO:0009987;GO:0010324;GO:0016043;GO:0016044;GO:0016050;GO:0016192;GO:0022607;GO:0033036;GO:0034613;GO:0034621;GO:0034622;GO:0043623;GO:0043933;GO:0048268;GO:0051179;GO:0051234;GO:0051641;GO:0061024;GO:0065003;GO:0070727;GO:0071822;GO:0071840;GO:0071841;GO:0071842;GO:0071844;GO:0072583;GO:0072657;GO:0072659	GO:0001786;GO:0005488;GO:0005543;GO:0005546;GO:0008289;GO:0035091	GO:0005886;GO:0005905;GO:0016020;GO:0016023;GO:0030135;GO:0030136;GO:0031410;GO:0031982;GO:0031988;GO:0043226;GO:0043227;GO:0043229;GO:0043231;GO:0044424;GO:0044425;GO:0044444;GO:0044464
Q3UQN2	F-BAR domain only protein 2	Fcho2	ASGKLSGINEIPRPFSPPVTSNTSPPPTAPL	S	487	1.2931	1.27603	1.2766	1.24871	*	< 0.0001	3	0.257333	0.351661	0.35231	0.320435	12218000	14-3-3 domain binding motif;Calmodulin-dependent protein kinase II substrate motif;Calmodulin-dependent protein kinase IV substrate motif;Chk1 kinase substrate motif;ERK1,2 kinase substrate motif;G protein-coupled receptor kinase 1 substrate motif;GSK-3, ERK1, ERK2, CDK5 substrate motif;PKA kinase substrate motif;PKC kinase substrate motif;WW domain binding motif	cellular component assembly;cellular component assembly at cellular level;cellular component organization;cellular component organization at cellular level;cellular component organization or biogenesis;cellular component organization or biogenesis at cellular level;cellular localization;cellular macromolecular complex assembly;cellular macromolecular complex subunit organization;cellular macromol…	binding;lipid binding;phosphatidylinositol binding;phosphatidylinositol-4,5-bisphosphate binding;phosphatidylserine binding;phospholipid binding	cell part;clathrin-coated vesicle;coated pit;coated vesicle;cytoplasmic membrane-bounded vesicle;cytoplasmic part;cytoplasmic vesicle;intracellular membrane-bounded organelle;intracellular organelle;intracellular part;membrane;membrane part;membrane-bounded organelle;membrane-bounded vesicle;organelle;plasma membrane;vesicle		Alternativesplicing;Coatedpit;Coiledcoil;Completeproteome;Disulfidebond;Endocytosis;Membrane;Phosphoprotein;Referenceproteome;Ublconjugation	GO:0006461;GO:0006810;GO:0006897;GO:0006898;GO:0006901;GO:0006996;GO:0007009;GO:0008104;GO:0009987;GO:0010324;GO:0016043;GO:0016044;GO:0016050;GO:0016192;GO:0022607;GO:0033036;GO:0034613;GO:0034621;GO:0034622;GO:0043623;GO:0043933;GO:0048268;GO:0051179;GO:0051234;GO:0051641;GO:0061024;GO:0065003;GO:0070727;GO:0071822;GO:0071840;GO:0071841;GO:0071842;GO:0071844;GO:0072583;GO:0072657;GO:0072659	GO:0001786;GO:0005488;GO:0005543;GO:0005546;GO:0008289;GO:0035091	GO:0005886;GO:0005905;GO:0016020;GO:0016023;GO:0030135;GO:0030136;GO:0031410;GO:0031982;GO:0031988;GO:0043226;GO:0043227;GO:0043229;GO:0043231;GO:0044424;GO:0044425;GO:0044444;GO:0044464
P42128	Forkhead box protein K1	Foxk1	PSPTGTISVPNSCPASPRGAGSSSYRFVQNV	S	243	1.4026	1.32756	1.28955	1.30443	*	0.000513833	3	0.374603	0.408782	0.366864	0.383416	3217500	ERK1,2 kinase substrate motif;G protein-coupled receptor kinase 1 substrate motif;Growth associated histone HI kinase substrate motif;GSK-3, ERK1, ERK2, CDK5 substrate motif;MAPKAPK2 kinase substrate motif;PKA kinase substrate motif;PKC kinase substrate motif;WW domain binding motif	anatomical structure development;biological regulation;cell differentiation;cellular developmental process;cellular process;developmental process;embryo development;muscle organ development;muscle structure development;negative regulation of biological process;negative regulation of biosynthetic process;negative regulation of cell cycle;negative regulation of cell growth;negative regulation of ce…	binding;cation binding;DNA bending activity;DNA binding;double-stranded DNA binding;ion binding;magnesium ion binding;metal ion binding;nucleic acid binding;nucleic acid binding transcription factor activity;protein binding;sequence-specific distal enhancer binding RNA polymerase II transcription factor activity;sequence-specific DNA binding;sequence-specific DNA binding RNA polymerase II transcr…	cell part;intracellular non-membrane-bounded organelle;intracellular organelle;intracellular organelle part;intracellular part;macromolecular complex;non-membrane-bounded organelle;nuclear part;nucleolus;nucleoplasm part;organelle;organelle part;protein complex;transcription factor complex		3D-structure;Acetylation;Activator;Completeproteome;Developmentalprotein;Differentiation;DNA-binding;Myogenesis;Nucleus;Phosphoprotein;Referenceproteome;Repressor;Transcription;Transcriptionregulation	GO:0000122;GO:0001558;GO:0006355;GO:0006357;GO:0007389;GO:0007517;GO:0009790;GO:0009888;GO:0009889;GO:0009890;GO:0009891;GO:0009892;GO:0009893;GO:0009987;GO:0010468;GO:0010556;GO:0010557;GO:0010558;GO:0010604;GO:0010605;GO:0010628;GO:0010629;GO:0019219;GO:0019222;GO:0030154;GO:0030308;GO:0031323;GO:0031324;GO:0031325;GO:0031326;GO:0031327;GO:0031328;GO:0032502;GO:0040008;GO:0045786;GO:0045892;GO:…	GO:0000287;GO:0000981;GO:0001071;GO:0003676;GO:0003677;GO:0003690;GO:0003700;GO:0003705;GO:0005488;GO:0005515;GO:0008134;GO:0008301;GO:0043167;GO:0043169;GO:0043565;GO:0043566;GO:0046872	GO:0005667;GO:0005730;GO:0032991;GO:0043226;GO:0043228;GO:0043229;GO:0043232;GO:0043234;GO:0044422;GO:0044424;GO:0044428;GO:0044446;GO:0044451;GO:0044464
P42128	Forkhead box protein K1	Foxk1	PTHPGLMSPRSSGLQTPECLSREGSPIPHDP	T	422	1.6006	1.71217	1.82798	1.66678	*	0.000406451	3	0.565112	0.775822	0.870252	0.737062	19035000	GSK-3, ERK1, ERK2, CDK5 substrate motif;MAPKAPK2 kinase substrate motif;WW domain binding motif	anatomical structure development;biological regulation;cell differentiation;cellular developmental process;cellular process;developmental process;embryo development;muscle organ development;muscle structure development;negative regulation of biological process;negative regulation of biosynthetic process;negative regulation of cell cycle;negative regulation of cell growth;negative regulation of ce…	binding;cation binding;DNA bending activity;DNA binding;double-stranded DNA binding;ion binding;magnesium ion binding;metal ion binding;nucleic acid binding;nucleic acid binding transcription factor activity;protein binding;sequence-specific distal enhancer binding RNA polymerase II transcription factor activity;sequence-specific DNA binding;sequence-specific DNA binding RNA polymerase II transcr…	cell part;intracellular non-membrane-bounded organelle;intracellular organelle;intracellular organelle part;intracellular part;macromolecular complex;non-membrane-bounded organelle;nuclear part;nucleolus;nucleoplasm part;organelle;organelle part;protein complex;transcription factor complex		3D-structure;Acetylation;Activator;Completeproteome;Developmentalprotein;Differentiation;DNA-binding;Myogenesis;Nucleus;Phosphoprotein;Referenceproteome;Repressor;Transcription;Transcriptionregulation	GO:0000122;GO:0001558;GO:0006355;GO:0006357;GO:0007389;GO:0007517;GO:0009790;GO:0009888;GO:0009889;GO:0009890;GO:0009891;GO:0009892;GO:0009893;GO:0009987;GO:0010468;GO:0010556;GO:0010557;GO:0010558;GO:0010604;GO:0010605;GO:0010628;GO:0010629;GO:0019219;GO:0019222;GO:0030154;GO:0030308;GO:0031323;GO:0031324;GO:0031325;GO:0031326;GO:0031327;GO:0031328;GO:0032502;GO:0040008;GO:0045786;GO:0045892;GO:…	GO:0000287;GO:0000981;GO:0001071;GO:0003676;GO:0003677;GO:0003690;GO:0003700;GO:0003705;GO:0005488;GO:0005515;GO:0008134;GO:0008301;GO:0043167;GO:0043169;GO:0043565;GO:0043566;GO:0046872	GO:0005667;GO:0005730;GO:0032991;GO:0043226;GO:0043228;GO:0043229;GO:0043232;GO:0043234;GO:0044422;GO:0044424;GO:0044428;GO:0044446;GO:0044451;GO:0044464
Q9R1E0	Forkhead box protein O1	Foxo1	YNCAPGLLKELLTSDSPPHNDIMSPVDPGVA	S	467	1.4942	1.77024	1.68393	1.60275	*	0.00134553	3	0.465873	0.823949	0.751834	0.680552	36496000	b-Adrenergic Receptor kinase substrate motif;ERK1,2 kinase substrate motif;GSK-3, ERK1, ERK2, CDK5 substrate motif;WW domain binding motif	anatomical structure development;apoptosis;biological regulation;blood vessel development;cell death;cell surface receptor linked signaling pathway;cellular process;cellular response to chemical stimulus;cellular response to endogenous stimulus;cellular response to hormone stimulus;cellular response to inorganic substance;cellular response to insulin stimulus;cellular response to nitric oxide;cel…	binding;DNA bending activity;DNA binding;double-stranded DNA binding;enzyme binding;kinase binding;nucleic acid binding;nucleic acid binding transcription factor activity;phosphatase binding;protein binding;protein kinase binding;protein phosphatase 2A binding;protein phosphatase binding;RNA polymerase II core promoter proximal region sequence-specific DNA binding transcription factor activity;RN…	cell part;cytoplasmic part;cytosol;intracellular organelle part;intracellular part;macromolecular complex;nuclear part;nucleoplasm part;organelle part;protein complex;transcription factor complex	Insulin signaling pathway;Pathways in cancer;Prostate cancer	Acetylation;Activator;Apoptosis;Completeproteome;Cytoplasm;DNA-binding;Methylation;Nucleus;Phosphoprotein;Referenceproteome;Transcription;Transcriptionregulation;Ublconjugation	GO:0001568;GO:0006109;GO:0006111;GO:0006355;GO:0006357;GO:0006915;GO:0006950;GO:0006974;GO:0007165;GO:0007166;GO:0007167;GO:0007169;GO:0007389;GO:0008219;GO:0008286;GO:0009719;GO:0009725;GO:0009790;GO:0009888;GO:0009889;GO:0009891;GO:0009893;GO:0009966;GO:0009968;GO:0009987;GO:0010033;GO:0010035;GO:0010468;GO:0010556;GO:0010557;GO:0010565;GO:0010604;GO:0010627;GO:0010628;GO:0010646;GO:0010648;GO:…	GO:0000981;GO:0000982;GO:0001071;GO:0001078;GO:0003676;GO:0003677;GO:0003690;GO:0003700;GO:0003705;GO:0005488;GO:0005515;GO:0008134;GO:0008301;GO:0019899;GO:0019900;GO:0019901;GO:0019902;GO:0019903;GO:0043565;GO:0043566;GO:0051721	GO:0005667;GO:0005829;GO:0032991;GO:0043234;GO:0044422;GO:0044424;GO:0044428;GO:0044444;GO:0044446;GO:0044451;GO:0044464
Q00422	GA-binding protein alpha chain	Gabpa	AKVQRSPRISGEDRSSPGNRTGNNGQIQLWQ	S	309	1.4503	1.43979	1.30883	1.36194	*	0.000927089	3	0.422851	0.525856	0.388283	0.445663	1260000	Casein kinase I substrate motif;ERK1,2 kinase substrate motif;GSK-3, ERK1, ERK2, CDK5 substrate motif;MDC1 BRCT domain binding motif;PKA kinase substrate motif;PKC kinase substrate motif;Plk1 PBD domain binding motif;WW domain binding motif	biological regulation;chordate embryonic development;developmental process;embryo development;embryo development ending in birth or egg hatching;in utero embryonic development;negative regulation of biological process;negative regulation of biosynthetic process;negative regulation of cell differentiation;negative regulation of cellular biosynthetic process;negative regulation of cellular macromol…	binding;chromatin binding;core promoter proximal region DNA binding;core promoter proximal region sequence-specific DNA binding;DNA binding;nucleic acid binding;protein binding;protein dimerization activity;protein heterodimerization activity;regulatory region DNA binding;regulatory region nucleic acid binding;RNA polymerase II core promoter proximal region sequence-specific DNA binding;RNA polym…	cell part;chromatin;chromosomal part;intracellular membrane-bounded organelle;intracellular organelle;intracellular organelle part;intracellular part;membrane-bounded organelle;nuclear chromatin;nuclear chromosome part;nuclear part;nucleus;organelle;organelle part		3D-structure;Completeproteome;DNA-binding;Nucleus;Referenceproteome;Transcription;Transcriptionregulation	GO:0000122;GO:0001701;GO:0002682;GO:0006355;GO:0006357;GO:0009790;GO:0009792;GO:0009889;GO:0009890;GO:0009891;GO:0009892;GO:0009893;GO:0010468;GO:0010556;GO:0010557;GO:0010558;GO:0010604;GO:0010605;GO:0010628;GO:0010629;GO:0019219;GO:0019222;GO:0031323;GO:0031324;GO:0031325;GO:0031326;GO:0031327;GO:0031328;GO:0032502;GO:0043009;GO:0045595;GO:0045596;GO:0045637;GO:0045638;GO:0045652;GO:0045653;GO:…	GO:0000975;GO:0000976;GO:0000977;GO:0000978;GO:0000987;GO:0001012;GO:0001067;GO:0001159;GO:0003676;GO:0003677;GO:0003682;GO:0005488;GO:0005515;GO:0043565;GO:0044212;GO:0046982;GO:0046983	GO:0000785;GO:0000790;GO:0005634;GO:0043226;GO:0043227;GO:0043229;GO:0043231;GO:0044422;GO:0044424;GO:0044427;GO:0044428;GO:0044446;GO:0044454;GO:0044464
A2A6A1	G patch domain-containing protein 8	Gpatch8	SGRRDFIRSKIYRSQSPHYFQSGRGEGPGKK	S	1039	2.351	2.39484	2.64655	2.39707	*	< 0.0001	3	1.11977	1.25993	1.40411	1.26127	1056300	14-3-3 domain binding motif;Calmodulin-dependent protein kinase I substrate motif;Calmodulin-dependent protein kinase II substrate motif;Calmodulin-dependent protein kinase IV substrate motif;Casein kinase II substrate motif;Chk1 kinase substrate motif;ERK1,2 kinase substrate motif;GSK-3, ERK1, ERK2, CDK5 substrate motif;PKA kinase substrate motif;PKC kinase substrate motif;WW domain binding motif		binding;cation binding;ion binding;metal ion binding;nucleic acid binding;transition metal ion binding;zinc ion binding			Coiledcoil;Completeproteome;Metal-binding;Phosphoprotein;Referenceproteome;Zinc;Zinc-finger		GO:0003676;GO:0005488;GO:0008270;GO:0043167;GO:0043169;GO:0046872;GO:0046914
Q6NXH3	Vasculin	Gpbp1	QIIRSSTFPQTDVLSSSLEAEHRLLKEMGWQ	S	380	1.7713	1.86241	1.96051	1.81492	*	< 0.0001	3	0.711308	0.897173	0.971229	0.859903	3068200	Casein kinase II substrate motif;G protein-coupled receptor kinase 1 substrate motif;MDC1 BRCT domain binding motif;Plk1 PBD domain binding motif	biological regulation;biosynthetic process;cellular biosynthetic process;cellular macromolecule biosynthetic process;cellular macromolecule metabolic process;cellular metabolic process;cellular nitrogen compound metabolic process;cellular process;macromolecule biosynthetic process;macromolecule metabolic process;metabolic process;nitrogen compound metabolic process;nucleic acid metabolic process;…	binding;DNA binding;nucleic acid binding;nucleic acid binding transcription factor activity;sequence-specific DNA binding transcription factor activity	cell part;intracellular membrane-bounded organelle;intracellular organelle;intracellular part;membrane-bounded organelle;nucleus;organelle		Activator;Alternativesplicing;Completeproteome;DNA-binding;Nucleus;Referenceproteome;Transcription;Transcriptionregulation	GO:0006139;GO:0006351;GO:0006355;GO:0006807;GO:0008152;GO:0009058;GO:0009059;GO:0009889;GO:0009891;GO:0009893;GO:0009987;GO:0010468;GO:0010556;GO:0010557;GO:0010604;GO:0010628;GO:0016070;GO:0019219;GO:0019222;GO:0031323;GO:0031325;GO:0031326;GO:0031328;GO:0032774;GO:0034641;GO:0034645;GO:0043170;GO:0044237;GO:0044238;GO:0044249;GO:0044260;GO:0045893;GO:0045935;GO:0048518;GO:0048522;GO:0050789;GO:…	GO:0001071;GO:0003676;GO:0003677;GO:0003700;GO:0005488	GO:0005634;GO:0043226;GO:0043227;GO:0043229;GO:0043231;GO:0044424;GO:0044464
Q8VCE2	GPN-loop GTPase 1	Gpn1	MGSVALDPEAGKGNASPVLDPSDLILTRGTL	S	314	1.3117	1.28219	1.26797	1.25384	*	< 0.0001	3	0.277937	0.358613	0.342526	0.326359	6689600	ERK1,2 kinase substrate motif;GSK-3, ERK1, ERK2, CDK5 substrate motif;PKA kinase substrate motif;WW domain binding motif		binding;catalytic activity;GTP binding;guanyl nucleotide binding;guanyl ribonucleotide binding;hydrolase activity;hydrolase activity, acting on acid anhydrides;hydrolase activity, acting on acid anhydrides, in phosphorus-containing anhydrides;nucleoside-triphosphatase activity;nucleotide binding;purine nucleotide binding;purine ribonucleoside triphosphate binding;purine ribonucleotide binding;pyr…	cell part;cytoplasm;intracellular membrane-bounded organelle;intracellular organelle;intracellular part;membrane-bounded organelle;organelle		Acetylation;Completeproteome;Cytoplasm;GTP-binding;Nucleotide-binding;Phosphoprotein;Referenceproteome		GO:0000166;GO:0003824;GO:0005488;GO:0005525;GO:0016462;GO:0016787;GO:0016817;GO:0016818;GO:0017076;GO:0017111;GO:0019001;GO:0032553;GO:0032555;GO:0032561;GO:0035639	GO:0005737;GO:0043226;GO:0043227;GO:0043229;GO:0043231;GO:0044424;GO:0044464
Q8VEF1	GRAM domain-containing protein 1A	Gramd1a	SDISPSGAADHSQEPSPVGSRRGRVTPNLSR	S	269	1.2018	1.24128	1.29351	1.21274	*	0.000761156	3	0.151696	0.311824	0.371286	0.278269	14210000	DNA dependent Protein kinase substrate motif;ERK1,2 kinase substrate motif;G protein-coupled receptor kinase 1 substrate motif;GSK3 kinase substrate motif;GSK-3, ERK1, ERK2, CDK5 substrate motif;MAPKAPK2 kinase substrate motif;WW domain binding motif			cell part;integral to membrane;intrinsic to membrane;membrane part		Alternativesplicing;Completeproteome;Membrane;Phosphoprotein;Referenceproteome;Transmembrane;Transmembranehelix			GO:0016021;GO:0031224;GO:0044425;GO:0044464
Q61191	Host cell factor 1;HCF N-terminal chain 1;HCF N-terminal chain 2;HCF N-terminal chain 3;HCF N-terminal chain 4;HCF N-terminal chain 5;HCF N-terminal chain 6;HCF C-terminal chain 1;HCF C-terminal chain 2;HCF C-terminal chain 3;HCF C-terminal chain 4;HCF C-terminal chain 5;HCF C-terminal chain 6	Hcfc1	VTPGTTTLPATVKVASSPVMVSNPATRMLKT	S	597	1.2233	1.14863	1.23077	1.16925	*	0.00156036	3	0.177278	0.19992	0.29956	0.225586	1255700	AMP-activated protein kinase substrate motif;HMGCoA Reductase kinase substrate motif;PKA kinase substrate motif;PKC kinase substrate motif	biological regulation;cell cycle;cellular component organization;cellular component organization at cellular level;cellular component organization or biogenesis;cellular component organization or biogenesis at cellular level;cellular macromolecule metabolic process;cellular metabolic process;cellular process;cellular protein metabolic process;chromatin modification;chromatin organization;chromoso…	acetyltransferase activity;binding;catalytic activity;chromatin binding;H4 histone acetyltransferase activity;histone acetyltransferase activity;histone acetyltransferase activity (H4-K16 specific);histone acetyltransferase activity (H4-K5 specific);histone acetyltransferase activity (H4-K8 specific);lysine N-acetyltransferase activity;N-acetyltransferase activity;N-acyltransferase activity;prote…	Ada2/Gcn5/Ada3 transcription activator complex;cell body;cell part;chromatin remodeling complex;cytoplasm;cytoplasmic part;histone acetyltransferase complex;histone methyltransferase complex;intracellular membrane-bounded organelle;intracellular organelle;intracellular organelle part;intracellular part;macromolecular complex;membrane-bounded organelle;methyltransferase complex;mitochondrion;MLL1 …		3D-structure;Acetylation;Autocatalyticcleavage;Cellcycle;Chromatinregulator;Completeproteome;Cytoplasm;Glycoprotein;Isopeptidebond;Kelchrepeat;Nucleus;Phosphoprotein;Referenceproteome;Repeat;Ublconjugation	GO:0000122;GO:0006325;GO:0006355;GO:0006357;GO:0006464;GO:0006473;GO:0006475;GO:0006996;GO:0007049;GO:0008152;GO:0009889;GO:0009890;GO:0009892;GO:0009893;GO:0009987;GO:0010468;GO:0010556;GO:0010558;GO:0010604;GO:0010605;GO:0010608;GO:0010628;GO:0010629;GO:0016043;GO:0016568;GO:0016569;GO:0016570;GO:0016573;GO:0018193;GO:0018205;GO:0018393;GO:0018394;GO:0019046;GO:0019219;GO:0019222;GO:0019538;GO:…	GO:0000988;GO:0000989;GO:0003682;GO:0003712;GO:0003713;GO:0003824;GO:0004402;GO:0004468;GO:0005488;GO:0008080;GO:0010485;GO:0016407;GO:0016410;GO:0016740;GO:0016746;GO:0016747;GO:0043995;GO:0043996;GO:0046972	GO:0000123;GO:0005671;GO:0005737;GO:0005739;GO:0016585;GO:0032991;GO:0034708;GO:0035097;GO:0043025;GO:0043226;GO:0043227;GO:0043229;GO:0043231;GO:0043234;GO:0044297;GO:0044422;GO:0044424;GO:0044428;GO:0044444;GO:0044446;GO:0044451;GO:0044464;GO:0048188;GO:0070461;GO:0070688;GO:0071339
Q8BLH7	HIRA-interacting protein 3	Hirip3	RALKKAVESTDEDHQTDLDAKMGLEESSEGE	T	141	1.4368	1.59141	1.56988	1.49151	*	0.000385758	3	0.409359	0.670305	0.650655	0.576773	4916500	Casein kinase I substrate motif;Casein kinase II substrate motif;G protein-coupled receptor kinase 1 substrate motif			cell part;intracellular membrane-bounded organelle;intracellular organelle;intracellular part;membrane-bounded organelle;nucleus;organelle		Completeproteome;Nucleus;Phosphoprotein;Referenceproteome			GO:0005634;GO:0043226;GO:0043227;GO:0043229;GO:0043231;GO:0044424;GO:0044464
P97825	Hematological and neurological expressed 1 protein;Hematological and neurological expressed 1 protein, N-terminally processed	Hn1	GGREDSESPGTQRSNSSEASSGDFLDLKGEG	S	87	1.3376	1.3087	1.35634	1.29954	*	< 0.0001	3	0.306146	0.388129	0.439723	0.377999	7698200	14-3-3 domain binding motif;Calmodulin-dependent protein kinase II substrate motif;Casein kinase II substrate motif;G protein-coupled receptor kinase 1 substrate motif;GSK3 kinase substrate motif;PKA kinase substrate motif;PKC kinase substrate motif			cell part;intracellular membrane-bounded organelle;intracellular organelle;intracellular part;membrane-bounded organelle;nucleus;organelle		Acetylation;Completeproteome;Nucleus;Phosphoprotein;Referenceproteome			GO:0005634;GO:0043226;GO:0043227;GO:0043229;GO:0043231;GO:0044424;GO:0044464
Q6ZPR6	Inhibitor of Bruton tyrosine kinase	Ibtk	SEGSYAGVASPRDLQSPDFTAGFHSDKVEGK	S	1046	1.2953	1.32031	1.31467	1.27614	*	< 0.0001	3	0.259786	0.400878	0.394702	0.351789	16272000	Casein kinase I substrate motif;ERK1,2 kinase substrate motif;G protein-coupled receptor kinase 1 substrate motif;GSK-3, ERK1, ERK2, CDK5 substrate motif;WW domain binding motif	biological regulation;calcium ion homeostasis;calcium ion transport;calcium ion transport into cytosol;cation homeostasis;cation transport;cellular calcium ion homeostasis;cellular cation homeostasis;cellular chemical homeostasis;cellular divalent inorganic cation homeostasis;cellular homeostasis;cellular ion homeostasis;cellular metal ion homeostasis;cellular process;chemical homeostasis;cytosol…	enzyme inhibitor activity;enzyme regulator activity;kinase inhibitor activity;kinase regulator activity;protein kinase inhibitor activity;protein kinase regulator activity;protein tyrosine kinase inhibitor activity	cell part;cytoplasm;intracellular membrane-bounded organelle;intracellular organelle;intracellular part;membrane;membrane-bounded organelle;nucleus;organelle		Alternativesplicing;ANKrepeat;Completeproteome;Cytoplasm;Membrane;Phosphoprotein;Referenceproteome;Repeat	GO:0006810;GO:0006811;GO:0006812;GO:0006816;GO:0006873;GO:0006874;GO:0006875;GO:0007204;GO:0009987;GO:0019725;GO:0030001;GO:0030003;GO:0032844;GO:0032879;GO:0042592;GO:0048519;GO:0048878;GO:0050789;GO:0050794;GO:0050801;GO:0051209;GO:0051234;GO:0051282;GO:0051283;GO:0051480;GO:0055065;GO:0055074;GO:0055080;GO:0055082;GO:0060401;GO:0060402;GO:0065007;GO:0065008;GO:0070838;GO:0072503;GO:0072507;GO:…	GO:0004857;GO:0004860;GO:0019207;GO:0019210;GO:0019887;GO:0030234;GO:0030292	GO:0005634;GO:0005737;GO:0016020;GO:0043226;GO:0043227;GO:0043229;GO:0043231;GO:0044424;GO:0044464
P26011	Integrin beta-7	Itgb7	VNPRFQGTNGRSPSLSLTREAD_________	S	800	1.7166	2.13526	1.8931	1.85799	*	0.00165723	3	0.666053	1.09441	0.920754	0.893741	18703000	Casein kinase II substrate motif;MAPKAPK2 kinase substrate motif	biological adhesion;biological regulation;cell adhesion;cell migration;cell motility;cell surface receptor linked signaling pathway;cell-matrix adhesion;cell-substrate adhesion;cellular component movement;cellular process;cellular response to stimulus;developmental process;immune system process;integrin-mediated signaling pathway;leukocyte migration;locomotion;multicellular organismal development…	receptor activity	cell part;integrin complex;macromolecular complex;membrane part;plasma membrane part;protein complex;receptor complex	Arrhythmogenic right ventricular cardiomyopathy (ARVC);Cell adhesion molecules (CAMs);Dilated cardiomyopathy;ECM-receptor interaction;Focal adhesion;Hypertrophic cardiomyopathy (HCM);Intestinal immune network for IgA production;Regulation of actin cytoskeleton	Celladhesion;Completeproteome;Directproteinsequencing;Disulfidebond;Glycoprotein;Integrin;Membrane;Receptor;Referenceproteome;Repeat;Signal;Transmembrane;Transmembranehelix	GO:0002376;GO:0006928;GO:0007155;GO:0007160;GO:0007165;GO:0007166;GO:0007229;GO:0007275;GO:0009987;GO:0016477;GO:0022610;GO:0031589;GO:0032501;GO:0032502;GO:0040011;GO:0048870;GO:0050789;GO:0050794;GO:0050896;GO:0050900;GO:0051716;GO:0065007	GO:0004872	GO:0008305;GO:0032991;GO:0043234;GO:0043235;GO:0044425;GO:0044459;GO:0044464
Q8C1D8	Protein IWS1 homolog	Iws1	EQRDLEQMPQRRRLSSTGGQTPRRDLEKVLT	S	667	1.26	1.41314	1.39395	1.3189	*	0.00179288	3	0.219923	0.498907	0.479184	0.399338	4882300	14-3-3 domain binding motif;Akt kinase substrate motif;Calmodulin-dependent protein kinase II substrate motif;MAPKAPK1 kinase substrate motif;MDC1 BRCT domain binding motif;PKA kinase substrate motif;PKC kinase substrate motif;Plk1 PBD domain binding motif;ZIP kinase substrate motif	biosynthetic process;cellular biosynthetic process;cellular macromolecule biosynthetic process;cellular macromolecule metabolic process;cellular metabolic process;cellular nitrogen compound metabolic process;cellular process;macromolecule biosynthetic process;macromolecule metabolic process;metabolic process;nitrogen compound metabolic process;nucleic acid metabolic process;nucleobase-containing …	binding;DNA binding;nucleic acid binding	cell part;intracellular membrane-bounded organelle;intracellular organelle;intracellular part;membrane-bounded organelle;nucleus;organelle		Alternativesplicing;Completeproteome;Nucleus;Phosphoprotein;Referenceproteome	GO:0006139;GO:0006351;GO:0006807;GO:0008152;GO:0009058;GO:0009059;GO:0009987;GO:0016070;GO:0032774;GO:0034641;GO:0034645;GO:0043170;GO:0044237;GO:0044238;GO:0044249;GO:0044260;GO:0090304	GO:0003676;GO:0003677;GO:0005488	GO:0005634;GO:0043226;GO:0043227;GO:0043229;GO:0043231;GO:0044424;GO:0044464
Q62137	Tyrosine-protein kinase JAK3	Jak3	APPSEETPLIPQRSCSLSSSEAGALHVLLPP	S	17	1.3	1.48421	1.36827	1.34632	*	0.00202993	3	0.265011	0.569697	0.452354	0.429021	5862600	14-3-3 domain binding motif;Calmodulin-dependent protein kinase II substrate motif;Casein kinase II substrate motif;G protein-coupled receptor kinase 1 substrate motif;GSK3 kinase substrate motif;Phosphorylase kinase substrate motif;PKA kinase substrate motif;PKC kinase substrate motif	anatomical structure development;B cell activation;B cell differentiation;biological regulation;calcium ion homeostasis;cation homeostasis;cell activation;cell differentiation;cell surface receptor linked signaling pathway;cellular calcium ion homeostasis;cellular cation homeostasis;cellular chemical homeostasis;cellular developmental process;cellular divalent inorganic cation homeostasis;cellula…	adenyl nucleotide binding;adenyl ribonucleotide binding;ATP binding;binding;catalytic activity;kinase activity;non-membrane spanning protein tyrosine kinase activity;nucleotide binding;phosphotransferase activity, alcohol group as acceptor;protein kinase activity;protein tyrosine kinase activity;purine nucleotide binding;purine ribonucleoside triphosphate binding;purine ribonucleotide binding;rib…	cell part;cytoplasmic part;cytoskeleton;cytosol;endomembrane system;intracellular non-membrane-bounded organelle;intracellular organelle;intracellular part;membrane;non-membrane-bounded organelle;organelle	Chemokine signaling pathway;Jak-STAT signaling pathway;ko05152;Measles	Adaptiveimmunity;Alternativesplicing;ATP-binding;Completeproteome;Cytoplasm;Immunity;Innateimmunity;Kinase;Membrane;Nucleotide-binding;Phosphoprotein;Referenceproteome;Repeat;SH2domain;Transferase;Tyrosine-proteinkinase	GO:0001775;GO:0001776;GO:0001817;GO:0001818;GO:0002260;GO:0002376;GO:0002521;GO:0002682;GO:0002683;GO:0002684;GO:0002694;GO:0002695;GO:0002696;GO:0002697;GO:0002698;GO:0002700;GO:0002701;GO:0002718;GO:0002719;GO:0002730;GO:0002731;GO:0002819;GO:0002822;GO:0002825;GO:0006355;GO:0006357;GO:0006464;GO:0006468;GO:0006793;GO:0006796;GO:0006873;GO:0006874;GO:0006875;GO:0006950;GO:0006952;GO:0006955;GO:…	GO:0000166;GO:0003824;GO:0004672;GO:0004713;GO:0004715;GO:0005488;GO:0005524;GO:0016301;GO:0016740;GO:0016772;GO:0016773;GO:0017076;GO:0030554;GO:0032553;GO:0032555;GO:0032559;GO:0035639	GO:0005829;GO:0005856;GO:0012505;GO:0016020;GO:0043226;GO:0043228;GO:0043229;GO:0043232;GO:0044424;GO:0044444;GO:0044464
Q91W40	Kinesin light chain 3	Klc3	RGEGMAGAAGMKRAMSLNMLNVDGPRAARTQ	S	467	1.4693	1.36412	1.37675	1.36631	*	0.000261934	3	0.441629	0.44797	0.461264	0.450288	896210	14-3-3 domain binding motif;AMP-activated protein kinase substrate motif;Calmodulin-dependent protein kinase I substrate motif;Calmodulin-dependent protein kinase II alpha substrate motif;Calmodulin-dependent protein kinase II substrate motif;Calmodulin-dependent protein kinase IV substrate motif;Chk1 kinase substrate motif;Phosphorylase kinase substrate motif;PKA kinase substrate motif;PKC kinas…	axon cargo transport;cellular component movement;cellular process;cytoskeleton-dependent intracellular transport;establishment of localization;establishment of localization in cell;intracellular transport;intraflagellar transport;microtubule-based movement;microtubule-based process;microtubule-based transport;transport	binding;catalytic activity;cytoskeletal protein binding;hydrolase activity;hydrolase activity, acting on acid anhydrides;hydrolase activity, acting on acid anhydrides, in phosphorus-containing anhydrides;kinesin binding;microtubule binding;microtubule motor activity;motor activity;nucleoside-triphosphatase activity;protein binding;pyrophosphatase activity;tubulin binding	cell part;cell projection;cell projection part;ciliary rootlet;cilium part;cytoplasm;cytoskeletal part;intracellular organelle part;intracellular part;kinesin complex;macromolecular complex;microtubule;microtubule associated complex;neuron projection;organelle part;protein complex		Coiledcoil;Completeproteome;Cytoplasm;Cytoskeleton;Microtubule;Motorprotein;Phosphoprotein;Referenceproteome;Repeat;TPRrepeat	GO:0006810;GO:0006928;GO:0007017;GO:0007018;GO:0008088;GO:0009987;GO:0010970;GO:0030705;GO:0042073;GO:0046907;GO:0051234;GO:0051649	GO:0003774;GO:0003777;GO:0003824;GO:0005488;GO:0005515;GO:0008017;GO:0008092;GO:0015631;GO:0016462;GO:0016787;GO:0016817;GO:0016818;GO:0017111;GO:0019894	GO:0005737;GO:0005871;GO:0005874;GO:0005875;GO:0032991;GO:0035253;GO:0042995;GO:0043005;GO:0043234;GO:0044422;GO:0044424;GO:0044430;GO:0044441;GO:0044446;GO:0044463;GO:0044464
Q6PDK2	Histone-lysine N-methyltransferase 2D	Kmt2d	PEELRLCPQPEEPYLSPQPEEPRLCPQPEEL	S	727	1.6026	1.836	2.02162	1.765	*	0.00249068	3	0.566914	0.876569	1.01551	0.819666	3065800	ERK1,2 kinase substrate motif;GSK-3, ERK1, ERK2, CDK5 substrate motif;WW domain binding motif	biological regulation;biosynthetic process;cell growth;cellular biosynthetic process;cellular component organization;cellular component organization at cellular level;cellular component organization or biogenesis;cellular component organization or biogenesis at cellular level;cellular macromolecule biosynthetic process;cellular macromolecule metabolic process;cellular metabolic process;cellular n…	binding;catalytic activity;cation binding;histone methyltransferase activity;histone-lysine N-methyltransferase activity;ion binding;lysine N-methyltransferase activity;metal ion binding;methyltransferase activity;N-methyltransferase activity;protein methyltransferase activity;protein-lysine N-methyltransferase activity;S-adenosylmethionine-dependent methyltransferase activity;transferase activit…	cell part;intracellular membrane-bounded organelle;intracellular organelle;intracellular part;membrane-bounded organelle;nucleus;organelle		Acetylation;Chromatinregulator;Coiledcoil;Completeproteome;Metal-binding;Methyltransferase;Nucleus;Phosphoprotein;Referenceproteome;Repeat;S-adenosyl-L-methionine;Transcription;Transcriptionregulation;Transferase;Zinc;Zinc-finger	GO:0001555;GO:0001701;GO:0003006;GO:0006139;GO:0006325;GO:0006342;GO:0006351;GO:0006355;GO:0006464;GO:0006479;GO:0006730;GO:0006807;GO:0006996;GO:0008152;GO:0008213;GO:0009058;GO:0009059;GO:0009790;GO:0009792;GO:0009889;GO:0009890;GO:0009892;GO:0009987;GO:0010468;GO:0010556;GO:0010558;GO:0010605;GO:0010629;GO:0016043;GO:0016049;GO:0016070;GO:0016458;GO:0016568;GO:0016569;GO:0016570;GO:0016571;GO:…	GO:0003824;GO:0005488;GO:0008168;GO:0008170;GO:0008270;GO:0008276;GO:0008757;GO:0016278;GO:0016279;GO:0016740;GO:0016741;GO:0018024;GO:0042054;GO:0043167;GO:0043169;GO:0046872;GO:0046914	GO:0005634;GO:0043226;GO:0043227;GO:0043229;GO:0043231;GO:0044424;GO:0044464
Q8BLB7	Lethal(3)maligt brain tumor-like protein 3	L3mbtl3	NLSKERIFPDRLSGDTSPPTTPSFPRSKRMD	T	604	1.1204	1.19121	1.13793	1.11971	*	0.00214835	3	0.0505134	0.252428	0.186416	0.163119	3258400	b-Adrenergic Receptor kinase substrate motif;G protein-coupled receptor kinase 1 substrate motif	biological regulation;biosynthetic process;cellular biosynthetic process;cellular component organization;cellular component organization at cellular level;cellular component organization or biogenesis;cellular component organization or biogenesis at cellular level;cellular macromolecule biosynthetic process;cellular macromolecule metabolic process;cellular metabolic process;cellular nitrogen comp…		cell part;intracellular membrane-bounded organelle;intracellular organelle;intracellular part;membrane-bounded organelle;nucleus;organelle		Alternativesplicing;Chromatinregulator;Completeproteome;Nucleus;Referenceproteome;Repeat;Transcription;Transcriptionregulation	GO:0006139;GO:0006325;GO:0006351;GO:0006355;GO:0006807;GO:0006996;GO:0008152;GO:0009058;GO:0009059;GO:0009889;GO:0009987;GO:0010468;GO:0010556;GO:0016043;GO:0016070;GO:0016568;GO:0019219;GO:0019222;GO:0031323;GO:0031326;GO:0032774;GO:0034641;GO:0034645;GO:0043170;GO:0044237;GO:0044238;GO:0044249;GO:0044260;GO:0050789;GO:0050794;GO:0051171;GO:0051252;GO:0051276;GO:0060255;GO:0065007;GO:0071840;GO:…		GO:0005634;GO:0043226;GO:0043227;GO:0043229;GO:0043231;GO:0044424;GO:0044464
Q6ZQ58	La-related protein 1	Larp1	ANKLFGAPEPSTIARSLPTTVPESPNYRNAR	S	743	1.2147	1.2207	1.17889	1.17344	*	< 0.0001	3	0.1671	0.287708	0.237435	0.230748	12120000	Casein kinase II substrate motif;G protein-coupled receptor kinase 1 substrate motif		binding;nucleic acid binding;RNA binding	cell part;cytoplasm;intracellular part		Acetylation;Alternativesplicing;Completeproteome;Phosphoprotein;Referenceproteome;RNA-binding		GO:0003676;GO:0003723;GO:0005488	GO:0005737;GO:0044424;GO:0044464
O54957	Linker for activation of T-cells family member 1	Lat	SAEASLDGSREYVNVSPEQQPVTRAELASVN	S	199	2.0884	2.06329	2.24567	2.07579	*	< 0.0001	3	0.948898	1.04495	1.16714	1.05366	6398600	Casein kinase II substrate motif;ERK1,2 kinase substrate motif;GSK-3, ERK1, ERK2, CDK5 substrate motif;WW domain binding motif	biological regulation;calcium-mediated signaling;cell activation;cell activation involved in immune response;cell surface receptor linked signaling pathway;cellular defense response;cellular process;cellular response to stimulus;defense response;enzyme linked receptor protein signaling pathway;establishment of localization;establishment of localization in cell;exocytosis;gene expression;immune ef…	binding;binding, bridging;molecular transducer activity;protein binding;protein binding, bridging;receptor signaling protein activity;SH3/SH2 adaptor activity;signal transducer activity;signaling adaptor activity	cell part;immunological synapse;integral to membrane;integral to plasma membrane;intracellular organelle part;intracellular part;intrinsic to membrane;intrinsic to plasma membrane;macromolecular complex;membrane part;nuclear part;organelle part;plasma membrane part;protein complex;signalosome	Fc epsilon RI signaling pathway;Fc gamma R-mediated phagocytosis;Natural killer cell mediated cytotoxicity;T cell receptor signaling pathway	Adaptiveimmunity;Cellmembrane;Completeproteome;Immunity;Lipoprotein;Mastcelldegranulation;Membrane;Palmitate;Phosphoprotein;Referenceproteome;Signal-anchor;Transmembrane;Transmembranehelix	GO:0001775;GO:0002252;GO:0002263;GO:0002274;GO:0002275;GO:0002279;GO:0002366;GO:0002376;GO:0002682;GO:0002694;GO:0006810;GO:0006887;GO:0006950;GO:0006952;GO:0006954;GO:0006955;GO:0006968;GO:0007165;GO:0007166;GO:0007167;GO:0007169;GO:0007229;GO:0007264;GO:0007265;GO:0008152;GO:0009611;GO:0009987;GO:0010467;GO:0016192;GO:0019722;GO:0019932;GO:0032940;GO:0035556;GO:0043170;GO:0043299;GO:0043303;GO:…	GO:0004871;GO:0005057;GO:0005070;GO:0005488;GO:0005515;GO:0030674;GO:0035591;GO:0060089;GO:0060090	GO:0001772;GO:0005887;GO:0008180;GO:0016021;GO:0031224;GO:0031226;GO:0032991;GO:0043234;GO:0044422;GO:0044424;GO:0044425;GO:0044428;GO:0044446;GO:0044459;GO:0044464
Q9EQR5	Lck-interacting transmembrane adapter 1	Lime1	TQLTISCARLGPGAEYACIQKHKGTEQGCQE	Y	175	1.9398	2.09667	1.74779	1.87299	*	0.000775555	3	0.842407	1.0681	0.805528	0.905346	4096300	EGFR kinase substrate motif;JAK2 kinase substrate motif;Src kinase substrate motif;TC-PTP phosphatase substrate motif	activation of immune response;antigen receptor-mediated signaling pathway;B cell receptor signaling pathway;biological regulation;cell surface receptor linked signaling pathway;cellular process;cellular response to stimulus;immune response-activating cell surface receptor signaling pathway;immune response-activating signal transduction;immune response-regulating cell surface receptor signaling pa…		B cell receptor complex;cell part;immunoglobulin complex;integral to membrane;intrinsic to membrane;macromolecular complex;membrane part;plasma membrane part;protein complex;receptor complex		Adaptiveimmunity;Cellmembrane;Completeproteome;Immunity;Lipoprotein;Membrane;Palmitate;Phosphoprotein;Referenceproteome;Signal-anchor;Transmembrane;Transmembranehelix	GO:0001932;GO:0002253;GO:0002376;GO:0002429;GO:0002682;GO:0002684;GO:0002757;GO:0002764;GO:0002768;GO:0006355;GO:0006357;GO:0007165;GO:0007166;GO:0009889;GO:0009966;GO:0009987;GO:0010468;GO:0010522;GO:0010556;GO:0010959;GO:0014066;GO:0019219;GO:0019220;GO:0019222;GO:0023051;GO:0031323;GO:0031326;GO:0031399;GO:0032268;GO:0032386;GO:0032844;GO:0032879;GO:0032880;GO:0033157;GO:0034762;GO:0042306;GO:…		GO:0016021;GO:0019814;GO:0019815;GO:0031224;GO:0032991;GO:0043234;GO:0043235;GO:0044425;GO:0044459;GO:0044464
Q9D8N6	Protein lin-37 homolog	Lin37	TAPGPLGDACRSRIPSPLQPETEGTPDDEPS	S	182	1.4164	1.47814	1.63312	1.46752	*	0.00138911	3	0.388728	0.563786	0.707635	0.553383	8029700	14-3-3 domain binding motif;Akt kinase substrate motif;Calmodulin-dependent protein kinase II substrate motif;DNA dependent Protein kinase substrate motif;ERK1,2 kinase substrate motif;G protein-coupled receptor kinase 1 substrate motif;GSK-3, ERK1, ERK2, CDK5 substrate motif;MAPKAPK1 kinase substrate motif;MAPKAPK2 kinase substrate motif;PKA kinase substrate motif;PKC kinase substrate motif;WW d…					Completeproteome;Phosphoprotein;Referenceproteome
Q3UHZ5	Leiomodin-2	Lmod2	LGYHFELPGPRMSMTSILTRNMDKQRQKRMQ	S	353	1.5206	1.50199	1.56552	1.48956	*	< 0.0001	3	0.49114	0.586876	0.646638	0.574885	851010	Casein kinase II substrate motif			cell part;cytoskeleton;intracellular non-membrane-bounded organelle;intracellular organelle;intracellular part;non-membrane-bounded organelle;organelle		Actin-binding;Coiledcoil;Completeproteome;Referenceproteome			GO:0005856;GO:0043226;GO:0043228;GO:0043229;GO:0043232;GO:0044424;GO:0044464
Q3UZ39	Leucine-rich repeat flightless-interacting protein 1	Lrrfip1	RKKQGKSEQQAEALDSPQKKTKNKKKKNKKK	S	547	1.7877	2.18647	2.20217	1.99637	*	0.00145245	3	0.724604	1.1286	1.13892	0.997377	62612000	b-Adrenergic Receptor kinase substrate motif;Cdc2 kinase substrate motif;CDK kinase substrate motif;CDK1,2,4,6 kinase substrate motif;ERK1,2 kinase substrate motif;GSK-3, ERK1, ERK2, CDK5 substrate motif;WW domain binding motif	biological regulation;biosynthetic process;cellular biosynthetic process;cellular macromolecule biosynthetic process;cellular macromolecule metabolic process;cellular metabolic process;cellular nitrogen compound metabolic process;cellular process;macromolecule biosynthetic process;macromolecule metabolic process;metabolic process;nitrogen compound metabolic process;nucleic acid metabolic process;…	binding;DNA binding;nucleic acid binding	cell part;cytoplasm;intracellular membrane-bounded organelle;intracellular organelle;intracellular part;membrane-bounded organelle;nucleus;organelle		Acetylation;Alternativesplicing;Coiledcoil;Completeproteome;Cytoplasm;DNA-binding;Nucleus;Phosphoprotein;Referenceproteome;Repressor;Transcription;Transcriptionregulation	GO:0006139;GO:0006351;GO:0006355;GO:0006807;GO:0008152;GO:0009058;GO:0009059;GO:0009889;GO:0009987;GO:0010468;GO:0010556;GO:0016070;GO:0019219;GO:0019222;GO:0031323;GO:0031326;GO:0032774;GO:0034641;GO:0034645;GO:0043170;GO:0044237;GO:0044238;GO:0044249;GO:0044260;GO:0050789;GO:0050794;GO:0051171;GO:0051252;GO:0060255;GO:0065007;GO:0080090;GO:0090304;GO:2000112	GO:0003676;GO:0003677;GO:0005488	GO:0005634;GO:0005737;GO:0043226;GO:0043227;GO:0043229;GO:0043231;GO:0044424;GO:0044464
Q61084	Mitogen-activated protein kinase kinase kinase 3	Map3k3	AVQYLDPRGRLRSADSENALTVQERNVPTKS	S	340	1.3721	1.4671	1.54856	1.42299	*	0.000818316	3	0.342885	0.552964	0.630929	0.508926	4990200	AMP-activated protein kinase substrate motif;b-Adrenergic Receptor kinase substrate motif;G protein-coupled receptor kinase 1 substrate motif	activation of MAPKK activity;activation of protein kinase activity;biological regulation;cellular macromolecule metabolic process;cellular metabolic process;cellular process;cellular protein metabolic process;cellular response to stimulus;intracellular protein kinase cascade;intracellular signal transduction;macromolecule metabolic process;macromolecule modification;MAPKKK cascade;metabolic proce…	adenyl nucleotide binding;adenyl ribonucleotide binding;ATP binding;binding;catalytic activity;cation binding;ion binding;kinase activity;MAP kinase kinase kinase activity;metal ion binding;molecular transducer activity;nucleotide binding;phosphotransferase activity, alcohol group as acceptor;protein kinase activity;protein serine/threonine kinase activity;purine nucleotide binding;purine ribonuc…		GnRH signaling pathway;MAPK signaling pathway;Neurotrophin signaling pathway	ATP-binding;Completeproteome;Kinase;Magnesium;Metal-binding;Nucleotide-binding;Phosphoprotein;Referenceproteome;Serine/threonine-proteinkinase;Transferase	GO:0000165;GO:0000186;GO:0001932;GO:0006464;GO:0006468;GO:0006793;GO:0006796;GO:0007165;GO:0007243;GO:0008152;GO:0009966;GO:0009967;GO:0009987;GO:0010627;GO:0010646;GO:0010647;GO:0010740;GO:0016310;GO:0019220;GO:0019222;GO:0019538;GO:0023051;GO:0023056;GO:0031323;GO:0031399;GO:0032147;GO:0032268;GO:0033674;GO:0035556;GO:0042325;GO:0043085;GO:0043122;GO:0043123;GO:0043170;GO:0043412;GO:0043549;GO:…	GO:0000166;GO:0003824;GO:0004672;GO:0004674;GO:0004702;GO:0004709;GO:0004871;GO:0005057;GO:0005488;GO:0005524;GO:0016301;GO:0016740;GO:0016772;GO:0016773;GO:0017076;GO:0030554;GO:0032553;GO:0032555;GO:0032559;GO:0035639;GO:0043167;GO:0043169;GO:0046872;GO:0060089
O35099	Mitogen-activated protein kinase kinase kinase 5	Map3k5	LGIPDENFEDHSAPPSPEEKDSGFFMLRKDS	S	1040	1.2313	1.28281	1.18666	1.20105	*	0.00109488	3	0.186682	0.359306	0.246908	0.264299	5482600	Casein kinase II substrate motif;DNA dependent Protein kinase substrate motif;ERK1,2 kinase substrate motif;GSK-3, ERK1, ERK2, CDK5 substrate motif;MAPKAPK2 kinase substrate motif;WW domain binding motif	activation of MAPK activity;biological regulation;cell death;cellular macromolecule metabolic process;cellular metabolic process;cellular process;cellular protein metabolic process;cellular response to stimulus;cellular response to stress;death;defense response;hydrogen peroxide-mediated programmed cell death;immune response;immune system process;induction of apoptosis;induction of apoptosis by i…	adenyl nucleotide binding;adenyl ribonucleotide binding;apoptotic protease activator activity;ATP binding;binding;caspase activator activity;caspase regulator activity;catalytic activity;cation binding;enzyme activator activity;enzyme regulator activity;identical protein binding;ion binding;kinase activity;magnesium ion binding;MAP kinase kinase kinase activity;metal ion binding;molecular transdu…	cell part;cytoplasmic part;endoplasmic reticulum;intracellular membrane-bounded organelle;intracellular organelle;intracellular part;membrane-bounded organelle;organelle	Amyotrophic lateral sclerosis (ALS);MAPK signaling pathway;Neurotrophin signaling pathway;Protein processing in endoplasmic reticulum	Apoptosis;ATP-binding;Coiledcoil;Completeproteome;Cytoplasm;Endoplasmicreticulum;Immunity;Innateimmunity;Kinase;Magnesium;Metal-binding;Nucleotide-binding;Phosphoprotein;Referenceproteome;Serine/threonine-proteinkinase;Stressresponse;Transferase;Ublconjugation	GO:0000165;GO:0000187;GO:0001932;GO:0002376;GO:0006464;GO:0006468;GO:0006793;GO:0006796;GO:0006917;GO:0006950;GO:0006952;GO:0006955;GO:0007165;GO:0007243;GO:0007254;GO:0008152;GO:0008219;GO:0008629;GO:0008631;GO:0009966;GO:0009987;GO:0010421;GO:0010941;GO:0010942;GO:0012501;GO:0012502;GO:0016265;GO:0016310;GO:0019220;GO:0019222;GO:0019538;GO:0023051;GO:0031098;GO:0031323;GO:0031399;GO:0032268;GO:…	GO:0000166;GO:0000287;GO:0003824;GO:0004672;GO:0004674;GO:0004702;GO:0004709;GO:0004871;GO:0005057;GO:0005488;GO:0005515;GO:0005524;GO:0008047;GO:0008656;GO:0016301;GO:0016504;GO:0016505;GO:0016740;GO:0016772;GO:0016773;GO:0017076;GO:0030234;GO:0030554;GO:0032553;GO:0032555;GO:0032559;GO:0035639;GO:0042802;GO:0042803;GO:0043028;GO:0043167;GO:0043169;GO:0046872;GO:0046983;GO:0060089;GO:0061134	GO:0005783;GO:0043226;GO:0043227;GO:0043229;GO:0043231;GO:0044424;GO:0044444;GO:0044464
P97820	Mitogen-activated protein kinase kinase kinase kinase 4	Map4k4	MTPSKEGTLIVRQTQSASSTLQKHKSSSSFT	S	836	2.8841	3.15584	2.29632	2.68327	*	0.00217741	3	1.41462	1.65802	1.19933	1.42399	1662400	Casein kinase II substrate motif;G protein-coupled receptor kinase 1 substrate motif	biological regulation;cellular process;cellular response to stimulus;intracellular protein kinase cascade;intracellular signal transduction;regulation of biological process;regulation of cellular process;regulation of cellular response to stress;regulation of intracellular protein kinase cascade;regulation of JNK cascade;regulation of MAPKKK cascade;regulation of response to stimulus;regulation o…	adenyl nucleotide binding;adenyl ribonucleotide binding;ATP binding;binding;catalytic activity;enzyme regulator activity;GTPase regulator activity;kinase activity;nucleoside-triphosphatase regulator activity;nucleotide binding;phosphotransferase activity, alcohol group as acceptor;protein kinase activity;protein serine/threonine kinase activity;purine nucleotide binding;purine ribonucleoside trip…	cell part;cytoplasm;intracellular part	MAPK signaling pathway	Acetylation;ATP-binding;Completeproteome;Cytoplasm;Kinase;Nucleotide-binding;Phosphoprotein;Referenceproteome;Serine/threonine-proteinkinase;Transferase	GO:0006950;GO:0007165;GO:0007243;GO:0009966;GO:0009987;GO:0010627;GO:0023051;GO:0035556;GO:0043408;GO:0046328;GO:0048583;GO:0050789;GO:0050794;GO:0050896;GO:0051716;GO:0065007;GO:0070302;GO:0080134;GO:0080135	GO:0000166;GO:0003824;GO:0004672;GO:0004674;GO:0005083;GO:0005488;GO:0005524;GO:0016301;GO:0016740;GO:0016772;GO:0016773;GO:0017076;GO:0030234;GO:0030554;GO:0030695;GO:0032553;GO:0032555;GO:0032559;GO:0035639;GO:0060589	GO:0005737;GO:0044424;GO:0044464
P47811	Mitogen-activated protein kinase 14	Mapk14	LDFGLARHTDDEMTGYVATRWYRAPEIMLNW	Y	182	1.1614	1.15693	1.20229	1.143	*	0.00027428	3	0.102364	0.210304	0.26579	0.192819	20912000	TC-PTP phosphatase substrate motif	aging;alcohol metabolic process;anatomical structure development;anatomical structure formation involved in morphogenesis;anatomical structure morphogenesis;angiogenesis;apoptosis;biological adhesion;biological regulation;biosynthetic process;carbohydrate metabolic process;carboxylic acid metabolic process;cartilage condensation;cell adhesion;cell aging;cell cycle checkpoint;cell death;cell diffe…	adenyl nucleotide binding;adenyl ribonucleotide binding;ATP binding;binding;catalytic activity;kinase activity;MAP kinase activity;molecular transducer activity;nucleotide binding;phosphotransferase activity, alcohol group as acceptor;protein kinase activity;protein serine/threonine kinase activity;purine nucleotide binding;purine ribonucleoside triphosphate binding;purine ribonucleotide binding;…	cell part;cytoplasmic part;cytoskeletal part;cytosol;intracellular membrane-bounded organelle;intracellular organelle;intracellular organelle part;intracellular part;membrane-bounded organelle;mitochondrion;nucleus;organelle;organelle part;spindle pole	Amyotrophic lateral sclerosis (ALS);Chagas disease (American trypanosomiasis);Epithelial cell signaling in Helicobacter pylori infection;Fc epsilon RI signaling pathway;GnRH signaling pathway;Hepatitis C;ko05152;Leishmaniasis;Leukocyte transendothelial migration;MAPK signaling pathway;MAPK signaling pathway - yeast;Neurotrophin signaling pathway;NOD-like receptor signaling pathway;Osteoclast diff…	3D-structure;Acetylation;Alternativesplicing;Apoptosis;ATP-binding;Completeproteome;Cytoplasm;Directproteinsequencing;Kinase;Nucleotide-binding;Nucleus;Phosphoprotein;Referenceproteome;Serine/threonine-proteinkinase;Stressresponse;Transcription;Transcriptionregulation;Transferase;Ublconjugation	GO:0000075;GO:0000077;GO:0000902;GO:0001502;GO:0001525;GO:0002062;GO:0002237;GO:0002521;GO:0002573;GO:0002682;GO:0005975;GO:0005996;GO:0006006;GO:0006066;GO:0006082;GO:0006139;GO:0006351;GO:0006355;GO:0006357;GO:0006464;GO:0006468;GO:0006629;GO:0006631;GO:0006793;GO:0006796;GO:0006807;GO:0006915;GO:0006950;GO:0006974;GO:0007155;GO:0007165;GO:0007166;GO:0007167;GO:0007169;GO:0007519;GO:0007568;GO:…	GO:0000166;GO:0003824;GO:0004672;GO:0004674;GO:0004702;GO:0004707;GO:0004871;GO:0005057;GO:0005488;GO:0005524;GO:0016301;GO:0016740;GO:0016772;GO:0016773;GO:0017076;GO:0030554;GO:0032553;GO:0032555;GO:0032559;GO:0035639;GO:0060089	GO:0000922;GO:0005634;GO:0005739;GO:0005829;GO:0043226;GO:0043227;GO:0043229;GO:0043231;GO:0044422;GO:0044424;GO:0044430;GO:0044444;GO:0044446;GO:0044464
Q68FL6	Methionine--tRNA ligase, cytoplasmic	Mars	IENLRQRFGGGQAKGSPKPAAVEAVTAAGSQ	S	827	1.767	1.96202	1.74119	1.77367	*	0.000294004	3	0.707802	0.972342	0.800071	0.826738	3040800	ERK1,2 kinase substrate motif;G protein-coupled receptor kinase 1 substrate motif;Growth associated histone HI kinase substrate motif;GSK-3, ERK1, ERK2, CDK5 substrate motif;PKA kinase substrate motif;PKC kinase substrate motif;WW domain binding motif	amine metabolic process;amino acid activation;carboxylic acid metabolic process;cellular amine metabolic process;cellular amino acid metabolic process;cellular ketone metabolic process;cellular macromolecule metabolic process;cellular metabolic process;cellular nitrogen compound metabolic process;cellular process;macromolecule metabolic process;metabolic process;methionyl-tRNA aminoacylation;ncRN…	adenyl nucleotide binding;adenyl ribonucleotide binding;aminoacyl-tRNA ligase activity;ATP binding;binding;catalytic activity;ligase activity;ligase activity, forming aminoacyl-tRNA and related compounds;ligase activity, forming carbon-oxygen bonds;methionine-tRNA ligase activity;nucleic acid binding;nucleotide binding;purine nucleotide binding;purine ribonucleoside triphosphate binding;purine ri…	cell part;cytoplasmic part;intracellular membrane-bounded organelle;intracellular organelle;intracellular part;membrane-bounded organelle;mitochondrion;organelle	Aminoacyl-tRNA biosynthesis;Selenocompound metabolism	Aminoacyl-tRNAsynthetase;ATP-binding;Completeproteome;Cytoplasm;Ligase;Nucleotide-binding;Proteinbiosynthesis;Referenceproteome;RNA-binding;tRNA-binding	GO:0006082;GO:0006139;GO:0006399;GO:0006418;GO:0006431;GO:0006520;GO:0006807;GO:0008152;GO:0009308;GO:0009987;GO:0016070;GO:0019752;GO:0034641;GO:0034660;GO:0042180;GO:0043038;GO:0043039;GO:0043170;GO:0043436;GO:0044106;GO:0044237;GO:0044238;GO:0044260;GO:0044281;GO:0090304	GO:0000049;GO:0000166;GO:0003676;GO:0003723;GO:0003824;GO:0004812;GO:0004825;GO:0005488;GO:0005524;GO:0016874;GO:0016875;GO:0016876;GO:0017076;GO:0030554;GO:0032553;GO:0032555;GO:0032559;GO:0035639	GO:0005739;GO:0043226;GO:0043227;GO:0043229;GO:0043231;GO:0044424;GO:0044444;GO:0044464
P97311	DNA replication licensing factor MCM6	Mcm6	METDEGQGGVNGHADSPAPVNRFNGSSEDAS	S	689	2.1837	2.52442	1.93843	2.14559	*	0.00202022	3	1.01327	1.33595	0.954889	1.10137	95394000	b-Adrenergic Receptor kinase substrate motif;ERK1,2 kinase substrate motif;GSK-3, ERK1, ERK2, CDK5 substrate motif;WW domain binding motif	cell cycle;cellular macromolecule metabolic process;cellular metabolic process;cellular nitrogen compound metabolic process;cellular process;DNA conformation change;DNA duplex unwinding;DNA geometric change;DNA metabolic process;DNA unwinding involved in replication;DNA-dependent DNA replication initiation;macromolecule metabolic process;metabolic process;nitrogen compound metabolic process;nucle…	adenyl nucleotide binding;adenyl ribonucleotide binding;ATP binding;ATPase activity;ATPase activity, coupled;ATP-dependent DNA helicase activity;ATP-dependent helicase activity;binding;catalytic activity;DNA binding;DNA helicase activity;DNA-dependent ATPase activity;helicase activity;hydrolase activity;hydrolase activity, acting on acid anhydrides;hydrolase activity, acting on acid anhydrides, i…	cell part;chromosomal part;intracellular membrane-bounded organelle;intracellular organelle;intracellular organelle part;intracellular part;macromolecular complex;MCM complex;membrane-bounded organelle;nuclear chromosome part;nuclear part;nucleoplasm part;nucleus;organelle;organelle part;protein complex	Cell cycle;Cell cycle - yeast;DNA replication;Meiosis - yeast	Acetylation;ATP-binding;Cellcycle;Completeproteome;Directproteinsequencing;DNA-binding;DNAreplication;Glycoprotein;Helicase;Hydrolase;Nucleotide-binding;Nucleus;Phosphoprotein;Referenceproteome	GO:0006139;GO:0006259;GO:0006268;GO:0006270;GO:0006807;GO:0007049;GO:0008152;GO:0009987;GO:0032392;GO:0032508;GO:0034641;GO:0043170;GO:0044237;GO:0044238;GO:0044260;GO:0071103;GO:0090304	GO:0000166;GO:0003676;GO:0003677;GO:0003678;GO:0003697;GO:0003824;GO:0004003;GO:0004386;GO:0005488;GO:0005524;GO:0008026;GO:0008094;GO:0016462;GO:0016787;GO:0016817;GO:0016818;GO:0016887;GO:0017076;GO:0017111;GO:0030554;GO:0032553;GO:0032555;GO:0032559;GO:0035639;GO:0042623;GO:0043566;GO:0070035	GO:0005634;GO:0032991;GO:0042555;GO:0043226;GO:0043227;GO:0043229;GO:0043231;GO:0043234;GO:0044422;GO:0044424;GO:0044427;GO:0044428;GO:0044446;GO:0044451;GO:0044454;GO:0044464
Q60929	Myocyte-specific enhancer factor 2A	Mef2a	AGNSPVGNGFVNSRASPNLIGNTGANSLGKV	S	233	1.3757	1.39451	1.4642	1.37444	*	0.000106832	3	0.346665	0.479758	0.550116	0.458846	1481000	AMP-activated protein kinase substrate motif;ERK1,2 kinase substrate motif;GSK-3, ERK1, ERK2, CDK5 substrate motif;PKA kinase substrate motif;PKC kinase substrate motif;WW domain binding motif	actin cytoskeleton organization;actin filament-based process;actomyosin structure organization;anatomical structure development;anatomical structure formation involved in morphogenesis;apoptosis;biological regulation;BMK cascade;cardiac conduction;cardiac myofibril assembly;cell death;cellular component assembly;cellular component assembly at cellular level;cellular component assembly involved in…	binding;chromatin binding;DNA binding;enzyme binding;histone acetyltransferase binding;histone deacetylase binding;nucleic acid binding;nucleic acid binding transcription factor activity;protein binding;protein binding transcription factor activity;regulatory region DNA binding;regulatory region nucleic acid binding;RNA polymerase II core promoter proximal region sequence-specific DNA binding tra…	cell part;chromatin;chromosomal part;intracellular organelle part;intracellular part;nuclear chromatin;nuclear chromosome part;nuclear part;organelle part		Acetylation;Activator;Alternativesplicing;Apoptosis;Completeproteome;Developmentalprotein;Differentiation;DNA-binding;Isopeptidebond;Neurogenesis;Nucleus;Phosphoprotein;Referenceproteome;Transcription;Transcriptionregulation;Ublconjugation	GO:0000002;GO:0000122;GO:0000165;GO:0003008;GO:0003013;GO:0003015;GO:0006355;GO:0006357;GO:0006915;GO:0006937;GO:0006942;GO:0006996;GO:0007005;GO:0007010;GO:0007165;GO:0007243;GO:0007399;GO:0008016;GO:0008219;GO:0009889;GO:0009890;GO:0009892;GO:0009987;GO:0010035;GO:0010038;GO:0010468;GO:0010556;GO:0010558;GO:0010605;GO:0010629;GO:0010927;GO:0012501;GO:0016043;GO:0016265;GO:0019219;GO:0019222;GO:…	GO:0000975;GO:0000976;GO:0000977;GO:0000981;GO:0000982;GO:0000988;GO:0000989;GO:0001012;GO:0001067;GO:0001071;GO:0001076;GO:0001077;GO:0001104;GO:0001105;GO:0001190;GO:0003676;GO:0003677;GO:0003682;GO:0003700;GO:0003705;GO:0003712;GO:0003713;GO:0005488;GO:0005515;GO:0019899;GO:0035035;GO:0042826;GO:0043565;GO:0044212;GO:0046332	GO:0000785;GO:0000790;GO:0044422;GO:0044424;GO:0044427;GO:0044428;GO:0044446;GO:0044454;GO:0044464
Q9JM52	Misshapen-like kinase 1	Mink1	RVPLKPYAAPVPRSQSLQDQPTRNLAAFPAS	S	603	2.5335	3.06533	2.74791	2.70196	*	0.000322372	3	1.22763	1.61604	1.45834	1.434	4167000	14-3-3 domain binding motif;Calmodulin-dependent protein kinase II alpha substrate motif;Calmodulin-dependent protein kinase II substrate motif;Calmodulin-dependent protein kinase IV substrate motif;Casein kinase II substrate motif;Chk1 kinase substrate motif;Phosphorylase kinase substrate motif;PKA kinase substrate motif;PKC kinase substrate motif;Pyruvate dehydrogenase kinase substrate motif	anatomical structure morphogenesis;biological regulation;cell communication;cell part morphogenesis;cell projection morphogenesis;cell projection organization;cell-cell signaling;cellular component morphogenesis;cellular component organization;cellular component organization at cellular level;cellular component organization or biogenesis;cellular component organization or biogenesis at cellular l…	adenyl nucleotide binding;adenyl ribonucleotide binding;ATP binding;binding;catalytic activity;enzyme regulator activity;GTPase regulator activity;kinase activity;nucleoside-triphosphatase regulator activity;nucleotide binding;phosphotransferase activity, alcohol group as acceptor;protein kinase activity;protein serine/threonine kinase activity;purine nucleotide binding;purine ribonucleoside trip…	axon;cell junction;cell part;cell projection;cytoplasm;cytoskeletal part;intracellular organelle part;intracellular part;membrane;neuron projection;organelle part;plasma membrane;postsynaptic density;postsynaptic membrane;synapse part;synaptic membrane		Alternativesplicing;ATP-binding;Celljunction;Cellmembrane;Cellprojection;Completeproteome;Cytoplasm;Directproteinsequencing;Kinase;Membrane;Nucleotide-binding;Phosphoprotein;Postsynapticcellmembrane;Referenceproteome;Serine/threonine-proteinkinase;Synapse;Transferase	GO:0002376;GO:0006464;GO:0006468;GO:0006793;GO:0006796;GO:0006950;GO:0007154;GO:0007165;GO:0007243;GO:0007267;GO:0007268;GO:0008152;GO:0009653;GO:0009966;GO:0009987;GO:0010469;GO:0016043;GO:0016310;GO:0019538;GO:0023051;GO:0023052;GO:0030030;GO:0032502;GO:0032989;GO:0032990;GO:0035556;GO:0043170;GO:0043383;GO:0043412;GO:0044237;GO:0044238;GO:0044260;GO:0044267;GO:0045058;GO:0045060;GO:0045061;GO:…	GO:0000166;GO:0003824;GO:0004672;GO:0004674;GO:0005083;GO:0005488;GO:0005524;GO:0016301;GO:0016740;GO:0016772;GO:0016773;GO:0017076;GO:0030234;GO:0030554;GO:0030695;GO:0032553;GO:0032555;GO:0032559;GO:0035639;GO:0060589	GO:0005737;GO:0005886;GO:0014069;GO:0016020;GO:0030054;GO:0030424;GO:0042995;GO:0043005;GO:0044422;GO:0044424;GO:0044430;GO:0044446;GO:0044456;GO:0044464;GO:0045211;GO:0097060
E9PVX6		Mki67	LTSFQEETAKRISSKSPQPEEKETLAGLKRQ	S	2649	1.3648	1.52783	1.58628	1.45139	*	0.0017439	3	0.335189	0.611484	0.665643	0.537439	1672100	ERK1,2 kinase substrate motif;Growth associated histone HI kinase substrate motif;GSK-3, ERK1, ERK2, CDK5 substrate motif;WW domain binding motif	anatomical structure morphogenesis;cell cycle phase;cell cycle process;cell proliferation;cellular macromolecule metabolic process;cellular metabolic process;cellular nitrogen compound metabolic process;cellular process;cellular response to heat;cellular response to stimulus;cellular response to stress;developmental process;DNA metabolic process;macromolecule metabolic process;meiosis;metabolic p…		cell part;chromosomal part;chromosome;chromosome, centromeric region;condensed chromosome;cytoplasm;intracellular non-membrane-bounded organelle;intracellular organelle;intracellular organelle part;intracellular part;non-membrane-bounded organelle;nuclear part;nucleolus;organelle;organelle part		Completeproteome;Referenceproteome	GO:0006139;GO:0006259;GO:0006807;GO:0006950;GO:0007126;GO:0008152;GO:0008283;GO:0009266;GO:0009408;GO:0009628;GO:0009653;GO:0009887;GO:0009987;GO:0022402;GO:0022403;GO:0031099;GO:0031100;GO:0032502;GO:0033554;GO:0034605;GO:0034641;GO:0043170;GO:0044237;GO:0044238;GO:0044260;GO:0050896;GO:0051716;GO:0090304		GO:0000775;GO:0000793;GO:0005694;GO:0005730;GO:0005737;GO:0043226;GO:0043228;GO:0043229;GO:0043232;GO:0044422;GO:0044424;GO:0044427;GO:0044428;GO:0044446;GO:0044464
Q7TPH6	E3 ubiquitin-protein ligase MYCBP2	Mycbp2	SDAAKLRSDSHSRSLSPNHNTLQTLKSDGRT	S	2823	1.5637	1.40892	1.4005	1.41814	*	0.000992408	3	0.531463	0.494593	0.485945	0.504	12767000	14-3-3 domain binding motif;Calmodulin-dependent protein kinase II substrate motif;ERK1,2 kinase substrate motif;GSK-3, ERK1, ERK2, CDK5 substrate motif;MAPKAPK2 kinase substrate motif;PKA kinase substrate motif;PKC kinase substrate motif;WW domain binding motif	anatomical structure morphogenesis;axon guidance;axonogenesis;biological regulation;biosynthetic process;branchiomotor neuron axon guidance;cell part morphogenesis;cell projection morphogenesis;cell projection organization;cellular biosynthetic process;cellular component morphogenesis;cellular component organization;cellular component organization at cellular level;cellular component organization…	acid-amino acid ligase activity;binding;catalytic activity;cation binding;ion binding;ligase activity;ligase activity, forming carbon-nitrogen bonds;metal ion binding;small conjugating protein ligase activity;transition metal ion binding;ubiquitin-protein ligase activity;zinc ion binding	axon;cell part;cell projection;cytoskeleton;intracellular membrane-bounded organelle;intracellular non-membrane-bounded organelle;intracellular organelle;intracellular part;membrane-bounded organelle;microtubule cytoskeleton;neuron projection;non-membrane-bounded organelle;nucleus;organelle		3D-structure;Alternativesplicing;Completeproteome;Directproteinsequencing;Disulfidebond;Ligase;Metal-binding;Nucleus;Phosphoprotein;Referenceproteome;Repeat;Transcription;Transcriptionregulation;Ublconjugationpathway;Zinc;Zinc-finger	GO:0006139;GO:0006351;GO:0006355;GO:0006807;GO:0006935;GO:0007409;GO:0007411;GO:0008045;GO:0008152;GO:0009058;GO:0009059;GO:0009605;GO:0009653;GO:0009889;GO:0009987;GO:0010468;GO:0010556;GO:0016043;GO:0016070;GO:0019219;GO:0019222;GO:0021785;GO:0021952;GO:0021955;GO:0030030;GO:0031323;GO:0031326;GO:0032502;GO:0032774;GO:0032879;GO:0032880;GO:0032989;GO:0032990;GO:0033043;GO:0034641;GO:0034645;GO:…	GO:0003824;GO:0004842;GO:0005488;GO:0008270;GO:0016874;GO:0016879;GO:0016881;GO:0019787;GO:0043167;GO:0043169;GO:0046872;GO:0046914	GO:0005634;GO:0005856;GO:0015630;GO:0030424;GO:0042995;GO:0043005;GO:0043226;GO:0043227;GO:0043228;GO:0043229;GO:0043231;GO:0043232;GO:0044424;GO:0044464
Q9CQ19	Myosin regulatory light polypeptide 9;Myosin regulatory light chain 12B	Myl9;Myl12b	RAKAKTTKKRPQRATSNVFAMFDQSQIQEFK	S	20	4.3174	5.37028	3.85148	4.35405	*	0.00144322	3	1.99666	2.425	1.94541	2.12236	37953000	14-3-3 domain binding motif;Calmodulin-dependent protein kinase II substrate motif;G protein-coupled receptor kinase 1 substrate motif;PKA kinase substrate motif;PKC kinase substrate motif		binding;calcium ion binding;cation binding;ion binding;metal ion binding	actin filament bundle;actomyosin;cell part;contractile fiber part;cytoplasmic part;cytoskeletal part;intracellular organelle part;intracellular part;macromolecular complex;myosin complex;myosin II complex;organelle part;protein complex;stress fiber;Z disc	Focal adhesion;Leukocyte transendothelial migration;Regulation of actin cytoskeleton;Tight junction;Vascular smooth muscle contraction	Acetylation;Calcium;Completeproteome;Metal-binding;Motorprotein;Muscleprotein;Myosin;Phosphoprotein;Referenceproteome;Repeat		GO:0005488;GO:0005509;GO:0043167;GO:0043169;GO:0046872	GO:0001725;GO:0016459;GO:0016460;GO:0030018;GO:0032432;GO:0032991;GO:0042641;GO:0043234;GO:0044422;GO:0044424;GO:0044430;GO:0044444;GO:0044446;GO:0044449;GO:0044464
Q9R207	Nibrin	Nbn	RNHAVLTVNFPVTSLSQTDEIPTLTIKDNSK	S	58	1.649	2.11919	1.9633	1.85099	*	0.00275444	3	0.608091	1.08351	0.973282	0.888296	6061700	ATM kinase substrate motif;Casein kinase II substrate motif;DNA dependent Protein kinase substrate motif;Pyruvate dehydrogenase kinase substrate motif	anatomical structure homeostasis;B cell activation;B cell activation involved in immune response;biological regulation;blastocyst growth;cell activation;cell activation involved in immune response;cell cycle checkpoint;cell cycle phase;cell cycle process;cell proliferation;cellular component organization;cellular component organization at cellular level;cellular component organization or biogenes…	ATPase activity;ATPase activity, coupled;ATP-dependent DNA helicase activity;ATP-dependent helicase activity;binding;catalytic activity;damaged DNA binding;DNA binding;DNA helicase activity;DNA-dependent ATPase activity;helicase activity;hydrolase activity;hydrolase activity, acting on acid anhydrides;hydrolase activity, acting on acid anhydrides, in phosphorus-containing anhydrides;nucleic acid …	cell part;chromosomal part;chromosome, telomeric region;inclusion body;intracellular non-membrane-bounded organelle;intracellular organelle;intracellular organelle part;intracellular part;macromolecular complex;Mre11 complex;non-membrane-bounded organelle;nuclear body;nuclear chromosome part;nuclear chromosome, telomeric region;nuclear inclusion body;nuclear part;nucleolus;nucleoplasm part;organe…	Homologous recombination	Cellcycle;Chromosome;Completeproteome;DNAdamage;DNArepair;Meiosis;Nucleus;Phosphoprotein;Referenceproteome;Telomere	GO:0000075;GO:0000077;GO:0000086;GO:0000723;GO:0001775;GO:0001832;GO:0001932;GO:0001934;GO:0002200;GO:0002204;GO:0002208;GO:0002252;GO:0002263;GO:0002285;GO:0002312;GO:0002366;GO:0002376;GO:0002562;GO:0003008;GO:0006139;GO:0006259;GO:0006281;GO:0006302;GO:0006310;GO:0006807;GO:0006950;GO:0006974;GO:0006996;GO:0007093;GO:0007095;GO:0007126;GO:0007346;GO:0008152;GO:0008283;GO:0009893;GO:0009987;GO:…	GO:0003676;GO:0003677;GO:0003678;GO:0003684;GO:0003824;GO:0004003;GO:0004386;GO:0005488;GO:0005515;GO:0008026;GO:0008094;GO:0008134;GO:0016462;GO:0016787;GO:0016817;GO:0016818;GO:0016887;GO:0017111;GO:0042623;GO:0047485;GO:0070035	GO:0000781;GO:0000784;GO:0005657;GO:0005730;GO:0016234;GO:0016604;GO:0016605;GO:0030870;GO:0032991;GO:0042405;GO:0043226;GO:0043228;GO:0043229;GO:0043232;GO:0043234;GO:0044422;GO:0044424;GO:0044427;GO:0044428;GO:0044446;GO:0044451;GO:0044454;GO:0044464
O09000	Nuclear receptor coactivator 3	Ncoa3	YGMGQPPEPAFGRGSSPPSAMMSSRMGPSQN	S	1304	1.155	1.09985	1.13748	1.10128	*	0.00130012	3	0.0943924	0.137305	0.185837	0.139178	4297800	14-3-3 domain binding motif;Calmodulin-dependent protein kinase II substrate motif;Calmodulin-dependent protein kinase IV substrate motif;Casein kinase II substrate motif;ERK1,2 kinase substrate motif;G protein-coupled receptor kinase 1 substrate motif;GSK-3, ERK1, ERK2, CDK5 substrate motif;MDC1 BRCT domain binding motif;PKA kinase substrate motif;PKC kinase substrate motif;Plk1 PBD domain bindi…	anatomical structure development;anatomical structure morphogenesis;biological regulation;biosynthetic process;branching involved in mammary gland duct morphogenesis;branching morphogenesis of a tube;cellular biosynthetic process;cellular component organization;cellular component organization at cellular level;cellular component organization or biogenesis;cellular component organization or biogen…	acetyltransferase activity;binding;catalytic activity;chromatin binding;histone acetyltransferase activity;lysine N-acetyltransferase activity;molecular transducer activity;N-acetyltransferase activity;N-acyltransferase activity;protein binding transcription factor activity;signal transducer activity;transcription coactivator activity;transcription cofactor activity;transcription factor binding t…	cell part;cytoplasm;intracellular organelle part;intracellular part;nuclear part;nucleoplasm;organelle part		Acetylation;Activator;Acyltransferase;Completeproteome;Cytoplasm;Methylation;Nucleus;Phosphoprotein;Referenceproteome;Repeat;Transcription;Transcriptionregulation;Transferase	GO:0001763;GO:0002009;GO:0003006;GO:0006139;GO:0006325;GO:0006351;GO:0006355;GO:0006464;GO:0006473;GO:0006475;GO:0006807;GO:0006996;GO:0008152;GO:0009058;GO:0009059;GO:0009653;GO:0009889;GO:0009987;GO:0010468;GO:0010556;GO:0016043;GO:0016070;GO:0016568;GO:0016569;GO:0016570;GO:0016573;GO:0018193;GO:0018205;GO:0018393;GO:0018394;GO:0019219;GO:0019222;GO:0019538;GO:0022414;GO:0031323;GO:0031326;GO:…	GO:0000988;GO:0000989;GO:0003682;GO:0003712;GO:0003713;GO:0003824;GO:0004402;GO:0004468;GO:0004871;GO:0005488;GO:0008080;GO:0016407;GO:0016410;GO:0016740;GO:0016746;GO:0016747;GO:0060089	GO:0005654;GO:0005737;GO:0044422;GO:0044424;GO:0044428;GO:0044446;GO:0044464
O88491	Histone-lysine N-methyltransferase, H3 lysine-36 and H4 lysine-20 specific	Nsd1	MDLIDLTPRQKERAASPQEVTPQADEKTAML	S	2369	1.83	1.50398	1.7122	1.63316	*	0.00201809	3	0.758343	0.588788	0.775855	0.707662	2283100	14-3-3 domain binding motif;Calmodulin-dependent protein kinase II substrate motif;Casein kinase II substrate motif;ERK1,2 kinase substrate motif;GSK-3, ERK1, ERK2, CDK5 substrate motif;MAPKAPK1 kinase substrate motif;PKA kinase substrate motif;PKC kinase substrate motif;WW domain binding motif	anatomical structure morphogenesis;biological regulation;biosynthetic process;cellular biosynthetic process;cellular macromolecule biosynthetic process;cellular macromolecule metabolic process;cellular metabolic process;cellular nitrogen compound metabolic process;cellular process;developmental process;embryonic morphogenesis;gastrulation;gastrulation with mouth forming second;macromolecule biosy…	androgen receptor binding;binding;catalytic activity;cation binding;chromatin binding;histone methyltransferase activity;histone methyltransferase activity (H3-K36 specific);histone methyltransferase activity (H4-K20 specific);histone-lysine N-methyltransferase activity;hormone receptor binding;ion binding;lysine N-methyltransferase activity;metal ion binding;methyltransferase activity;N-methyltr…	cell part;chromosome;histone methyltransferase complex;intracellular non-membrane-bounded organelle;intracellular organelle;intracellular organelle part;intracellular part;macromolecular complex;methyltransferase complex;non-membrane-bounded organelle;nuclear part;nucleoplasm part;organelle;organelle part;protein complex		Activator;Chromatinregulator;Chromosome;Completeproteome;Developmentalprotein;Metal-binding;Methyltransferase;Nucleus;Phosphoprotein;Receptor;Referenceproteome;Repeat;Repressor;S-adenosyl-L-methionine;Transcription;Transcriptionregulation;Transferase;Zinc;Zinc-finger	GO:0000122;GO:0001702;GO:0006139;GO:0006351;GO:0006355;GO:0006357;GO:0006807;GO:0007369;GO:0008152;GO:0009058;GO:0009059;GO:0009653;GO:0009889;GO:0009890;GO:0009891;GO:0009892;GO:0009893;GO:0009987;GO:0010468;GO:0010556;GO:0010557;GO:0010558;GO:0010604;GO:0010605;GO:0010628;GO:0010629;GO:0016070;GO:0019219;GO:0019222;GO:0031323;GO:0031324;GO:0031325;GO:0031326;GO:0031327;GO:0031328;GO:0032502;GO:…	GO:0000988;GO:0000989;GO:0003682;GO:0003712;GO:0003714;GO:0003824;GO:0005102;GO:0005488;GO:0005515;GO:0008168;GO:0008170;GO:0008270;GO:0008276;GO:0008757;GO:0016278;GO:0016279;GO:0016740;GO:0016741;GO:0018024;GO:0035257;GO:0035258;GO:0042054;GO:0042799;GO:0043167;GO:0043169;GO:0046872;GO:0046914;GO:0046975;GO:0050681;GO:0051427	GO:0005694;GO:0032991;GO:0034708;GO:0035097;GO:0043226;GO:0043228;GO:0043229;GO:0043232;GO:0043234;GO:0044422;GO:0044424;GO:0044428;GO:0044446;GO:0044451;GO:0044464
Q8BJ71	Nuclear pore complex protein Nup93	Nup93	QQAGERLRSRTLTRTSQETADVKASVLLGSR	S	52	1.2655	1.33662	1.20696	1.23576	*	0.00197826	3	0.226207	0.41859	0.271383	0.305393	4720600	ATM kinase substrate motif;Casein kinase II substrate motif;DNA dependent Protein kinase substrate motif;G protein-coupled receptor kinase 1 substrate motif;PKA kinase substrate motif;PKC kinase substrate motif	cellular component assembly;cellular component assembly at cellular level;cellular component organization;cellular component organization at cellular level;cellular component organization or biogenesis;cellular component organization or biogenesis at cellular level;cellular macromolecular complex assembly;cellular macromolecular complex subunit organization;cellular process;cellular protein compl…	structural constituent of nuclear pore;structural molecule activity	cell part;intracellular organelle part;intracellular part;macromolecular complex;membrane;membrane part;nuclear membrane;nuclear part;nuclear periphery;nuclear pore;organelle membrane;organelle part;pore complex;protein complex	RNA transport	Alternativesplicing;Completeproteome;Membrane;mRNAtransport;Nuclearporecomplex;Nucleus;Phosphoprotein;Proteintransport;Referenceproteome;Translocation;Transport	GO:0006461;GO:0006810;GO:0006996;GO:0006997;GO:0006999;GO:0009987;GO:0015031;GO:0015931;GO:0016043;GO:0022607;GO:0034621;GO:0034622;GO:0043623;GO:0043933;GO:0045184;GO:0046931;GO:0050657;GO:0050658;GO:0051028;GO:0051234;GO:0051236;GO:0051292;GO:0065003;GO:0071822;GO:0071840;GO:0071841;GO:0071842;GO:0071844	GO:0005198;GO:0017056	GO:0005643;GO:0016020;GO:0031090;GO:0031965;GO:0032991;GO:0034399;GO:0043234;GO:0044422;GO:0044424;GO:0044425;GO:0044428;GO:0044446;GO:0044464;GO:0046930
Q8BJ71	Nuclear pore complex protein Nup93	Nup93	IQQAGERLRSRTLTRTSQETADVKASVLLGS	T	51	1.4028	1.44477	1.27442	1.33653	*	0.00187359	3	0.374809	0.530836	0.349842	0.418495	7158500	Casein kinase II substrate motif;G protein-coupled receptor kinase 1 substrate motif	cellular component assembly;cellular component assembly at cellular level;cellular component organization;cellular component organization at cellular level;cellular component organization or biogenesis;cellular component organization or biogenesis at cellular level;cellular macromolecular complex assembly;cellular macromolecular complex subunit organization;cellular process;cellular protein compl…	structural constituent of nuclear pore;structural molecule activity	cell part;intracellular organelle part;intracellular part;macromolecular complex;membrane;membrane part;nuclear membrane;nuclear part;nuclear periphery;nuclear pore;organelle membrane;organelle part;pore complex;protein complex	RNA transport	Alternativesplicing;Completeproteome;Membrane;mRNAtransport;Nuclearporecomplex;Nucleus;Phosphoprotein;Proteintransport;Referenceproteome;Translocation;Transport	GO:0006461;GO:0006810;GO:0006996;GO:0006997;GO:0006999;GO:0009987;GO:0015031;GO:0015931;GO:0016043;GO:0022607;GO:0034621;GO:0034622;GO:0043623;GO:0043933;GO:0045184;GO:0046931;GO:0050657;GO:0050658;GO:0051028;GO:0051234;GO:0051236;GO:0051292;GO:0065003;GO:0071822;GO:0071840;GO:0071841;GO:0071842;GO:0071844	GO:0005198;GO:0017056	GO:0005643;GO:0016020;GO:0031090;GO:0031965;GO:0032991;GO:0034399;GO:0043234;GO:0044422;GO:0044424;GO:0044425;GO:0044428;GO:0044446;GO:0044464;GO:0046930
Q3B7Z2	Oxysterol-binding protein 1	Osbp	NDLIAKHGTALQRSLSELESLKLPAESNEKI	S	238	1.1463	1.14347	1.15539	1.11865	*	< 0.0001	3	0.0834842	0.193414	0.208385	0.161761	8630200	14-3-3 domain binding motif;Calmodulin-dependent protein kinase II substrate motif;Calmodulin-dependent protein kinase IV substrate motif;Casein kinase II substrate motif;Chk1 kinase substrate motif;G protein-coupled receptor kinase 1 substrate motif;GSK3 kinase substrate motif;PKA kinase substrate motif;PKC kinase substrate motif	establishment of localization;lipid transport;organic substance transport;transport	binding;lipid binding;phospholipid binding	cell part;cytoplasmic part;Golgi apparatus part;Golgi membrane;intracellular organelle part;intracellular part;membrane;organelle membrane;organelle part		Acetylation;Alternativesplicing;Coiledcoil;Completeproteome;Cytoplasm;Golgiapparatus;Lipid-binding;Lipidtransport;Membrane;Phosphoprotein;Referenceproteome;Transport	GO:0006810;GO:0006869;GO:0051234;GO:0071702	GO:0005488;GO:0005543;GO:0008289	GO:0000139;GO:0016020;GO:0031090;GO:0044422;GO:0044424;GO:0044431;GO:0044444;GO:0044446;GO:0044464
Q9DBS9	Oxysterol-binding protein-related protein 3	Osbpl3	IQVPKPFSGPVRLHSSNPNLSTLDFGEEKSY	S	272	1.3429	1.36834	1.39162	1.33208	*	< 0.0001	3	0.311851	0.452425	0.476765	0.413681	26837000	AMP-activated protein kinase substrate motif;MDC1 BRCT domain binding motif;Plk1 PBD domain binding motif	establishment of localization;lipid transport;organic substance transport;transport	binding;cholesterol binding;lipid binding;phospholipid binding;steroid binding;sterol binding	cell part;cytoplasmic part;cytosol;endoplasmic reticulum part;intracellular organelle part;intracellular part;membrane;nuclear membrane;nuclear part;organelle membrane;organelle part;perinuclear endoplasmic reticulum;plasma membrane		Completeproteome;Lipid-binding;Lipidtransport;Phosphoprotein;Referenceproteome;Transport	GO:0006810;GO:0006869;GO:0051234;GO:0071702	GO:0005488;GO:0005496;GO:0005543;GO:0008289;GO:0015485;GO:0032934	GO:0005829;GO:0005886;GO:0016020;GO:0031090;GO:0031965;GO:0044422;GO:0044424;GO:0044428;GO:0044432;GO:0044444;GO:0044446;GO:0044464;GO:0097038
B2RRE7	OTU domain-containing protein 4	Otud4	GANSVDRLQRPKEESSEDENEVSNILRSGRS	S	1017	1.6408	1.47165	1.47704	1.48832	*	0.000672764	3	0.600899	0.557433	0.562714	0.573682	4160500	BARD1 BRCT domain binding motif;Casein kinase I substrate motif;Casein kinase II substrate motif;G protein-coupled receptor kinase 1 substrate motif;MDC1 BRCT domain binding motif;PKA kinase substrate motif;Plk1 PBD domain binding motif					Acetylation;Completeproteome;Phosphoprotein;Referenceproteome
Q5SPL2	PHD finger protein 12	Phf12	ESRPLGSPPNATRVLTPPQAAGDSILATGAN	T	670	1.5275	1.69647	1.49912	1.53132	*	0.000736465	3	0.497672	0.762538	0.58412	0.614777	3249600	Calmodulin-dependent protein kinase II substrate motif;G protein-coupled receptor kinase 1 substrate motif;GSK-3, ERK1, ERK2, CDK5 substrate motif;PKC kinase substrate motif;RAF1 kinase substrate motif;WW domain binding motif		binding;cation binding;ion binding;lipid binding;metal ion binding;phosphatidylinositol binding;phospholipid binding;protein binding transcription factor activity;RNA polymerase II transcription cofactor activity;RNA polymerase II transcription corepressor activity;RNA polymerase II transcription factor binding transcription factor activity;RNA polymerase II transcription factor binding transcrip…	cell part;chromatin remodeling complex;chromosomal part;histone deacetylase complex;intracellular organelle part;intracellular part;macromolecular complex;nuclear chromosome part;nuclear part;nucleoplasm part;organelle part;protein complex;Sin3 complex;Sin3-type complex;transcriptional repressor complex		Alternativesplicing;Completeproteome;Metal-binding;Nucleus;Phosphoprotein;Referenceproteome;Repeat;Repressor;Transcription;Transcriptionregulation;Zinc;Zinc-finger		GO:0000988;GO:0000989;GO:0001076;GO:0001104;GO:0001106;GO:0001191;GO:0003712;GO:0003714;GO:0005488;GO:0005543;GO:0008270;GO:0008289;GO:0035091;GO:0043167;GO:0043169;GO:0046872;GO:0046914	GO:0000118;GO:0016580;GO:0016585;GO:0017053;GO:0032991;GO:0043234;GO:0044422;GO:0044424;GO:0044427;GO:0044428;GO:0044446;GO:0044451;GO:0044454;GO:0044464;GO:0070822
Q9Z1T6	1-phosphatidylinositol 3-phosphate 5-kinase	Pikfyve	KASGMLSFFRGTAGKSPDLSSQKRETLRGAD	S	1753	1.4226	1.34112	1.37878	1.3447	*	< 0.0001	3	0.39503	0.423443	0.46339	0.427288	4928800	ERK1,2 kinase substrate motif;G protein-coupled receptor kinase 1 substrate motif;Growth associated histone HI kinase substrate motif;GSK3 kinase substrate motif;GSK-3, ERK1, ERK2, CDK5 substrate motif;WW domain binding motif	anatomical structure formation involved in morphogenesis;biological regulation;cellular component assembly;cellular component assembly at cellular level;cellular component assembly involved in morphogenesis;cellular component organization;cellular component organization at cellular level;cellular component organization or biogenesis;cellular component organization or biogenesis at cellular level;…	1-phosphatidylinositol-3-phosphate 5-kinase activity;1-phosphatidylinositol-4-phosphate 5-kinase activity;adenyl nucleotide binding;adenyl ribonucleotide binding;ATP binding;binding;catalytic activity;cation binding;inositol or phosphatidylinositol kinase activity;ion binding;kinase activity;lipid kinase activity;metal ion binding;nucleotide binding;phosphatidylinositol phosphate kinase activity;…	cell part;cytoplasmic part;cytoplasmic vesicle;cytoplasmic vesicle membrane;cytoplasmic vesicle part;cytosol;early endosome membrane;endosomal part;endosome membrane;Golgi apparatus part;Golgi membrane;intracellular organelle;intracellular organelle part;intracellular part;late endosome membrane;membrane;organelle;organelle membrane;organelle part;perinuclear region of cytoplasm;vesicle;vesicle m…	Inositol phosphate metabolism;Phagosome;Phosphatidylinositol signaling system;Regulation of actin cytoskeleton	Acetylation;Alternativesplicing;ATP-binding;Completeproteome;Cytoplasmicvesicle;Endosome;Kinase;Membrane;Metal-binding;Nucleotide-binding;Phosphoprotein;Referenceproteome;Transferase;Zinc;Zinc-finger	GO:0007165;GO:0008152;GO:0009987;GO:0010927;GO:0016043;GO:0019538;GO:0022607;GO:0032288;GO:0032502;GO:0035556;GO:0043170;GO:0044237;GO:0044238;GO:0044260;GO:0044267;GO:0048646;GO:0050789;GO:0050794;GO:0050896;GO:0051716;GO:0065007;GO:0071840;GO:0071841;GO:0071842;GO:0071844	GO:0000166;GO:0000285;GO:0001727;GO:0003824;GO:0004428;GO:0005488;GO:0005524;GO:0008270;GO:0016301;GO:0016307;GO:0016308;GO:0016740;GO:0016772;GO:0016773;GO:0017076;GO:0030554;GO:0032553;GO:0032555;GO:0032559;GO:0035639;GO:0043167;GO:0043169;GO:0046872;GO:0046914	GO:0000139;GO:0005829;GO:0010008;GO:0012506;GO:0016020;GO:0030659;GO:0031090;GO:0031410;GO:0031901;GO:0031902;GO:0031982;GO:0043226;GO:0043229;GO:0044422;GO:0044424;GO:0044431;GO:0044433;GO:0044440;GO:0044444;GO:0044446;GO:0044464;GO:0048471
O55176	E3 ubiquitin-protein ligase Praja-1	Pja1	AEVPMHRSTANQSKRSRSPFASTRRRWDDSE	S	30	1.2226	1.32723	1.21747	1.22229	*	0.00202252	3	0.176452	0.408422	0.283887	0.289587	920520	Casein kinase II substrate motif;PKA kinase substrate motif;PKC kinase substrate motif	catabolic process;macromolecule catabolic process;macromolecule metabolic process;metabolic process;primary metabolic process;protein catabolic process;protein metabolic process	acid-amino acid ligase activity;binding;catalytic activity;cation binding;ion binding;ligase activity;ligase activity, forming carbon-nitrogen bonds;metal ion binding;small conjugating protein ligase activity;transition metal ion binding;ubiquitin-protein ligase activity;zinc ion binding	cell part;cytoplasm;intracellular part		Alternativesplicing;Completeproteome;Ligase;Metal-binding;Phosphoprotein;Referenceproteome;Ublconjugation;Ublconjugationpathway;Zinc;Zinc-finger	GO:0008152;GO:0009056;GO:0009057;GO:0019538;GO:0030163;GO:0043170;GO:0044238	GO:0003824;GO:0004842;GO:0005488;GO:0008270;GO:0016874;GO:0016879;GO:0016881;GO:0019787;GO:0043167;GO:0043169;GO:0046872;GO:0046914	GO:0005737;GO:0044424;GO:0044464
Q8C8U0	Liprin-beta-1	Ppfibp1	ATAGPRLGWSRDLGQSNSDLDMPFAKWTKEQ	S	595	1.6008	1.44225	1.54628	1.48879	*	0.000338748	3	0.565293	0.528324	0.6288	0.574139	392910	Casein kinase II substrate motif;Pyruvate dehydrogenase kinase substrate motif					3D-structure;Acetylation;Alternativesplicing;Coiledcoil;Completeproteome;Phosphoprotein;Referenceproteome;Repeat
Q8BQ30	Phostensin	Ppp1r18	GDDSPKRKEVLESILSPGEPGDQKASPTDVH	S	224	1.4912	1.71212	1.46441	1.51189	*	0.00209752	3	0.462973	0.775782	0.550316	0.596357	504100	Casein kinase II substrate motif;ERK1,2 kinase substrate motif;G protein-coupled receptor kinase 1 substrate motif;GSK-3, ERK1, ERK2, CDK5 substrate motif;WW domain binding motif			cell part;cytoplasm;cytoskeleton;intracellular non-membrane-bounded organelle;intracellular organelle;intracellular part;non-membrane-bounded organelle;organelle		Actin-binding;Alternativesplicing;Completeproteome;Cytoplasm;Cytoskeleton;Phosphoprotein;Referenceproteome			GO:0005737;GO:0005856;GO:0043226;GO:0043228;GO:0043229;GO:0043232;GO:0044424;GO:0044464
Q5EG47	5'-AMP-activated protein kinase catalytic subunit alpha-1	Prkaa1	LLDFRSIDDEITEAKSGTATPQRSGSISNYR	S	486	1.3973	1.29205	1.41614	1.332	*	0.000672989	3	0.369141	0.369666	0.50196	0.413589	11139000	Casein kinase I substrate motif;Casein kinase II substrate motif;G protein-coupled receptor kinase 1 substrate motif	alcohol metabolic process;autophagy;biological regulation;biosynthetic process;carbohydrate homeostasis;carbohydrate metabolic process;carboxylic acid biosynthetic process;carboxylic acid metabolic process;catabolic process;cell communication;cell surface receptor linked signaling pathway;cellular biosynthetic process;cellular carbohydrate metabolic process;cellular catabolic process;cellular com…	[acetyl-CoA carboxylase] kinase activity;[hydroxymethylglutaryl-CoA reductase (NADPH)] kinase activity;adenyl nucleotide binding;adenyl ribonucleotide binding;AMP-activated protein kinase activity;ATP binding;binding;catalytic activity;cation binding;chromatin binding;histone kinase activity;histone serine kinase activity;ion binding;kinase activity;metal ion binding;nucleotide binding;phosphotra…	AMP-activated protein kinase complex;apical plasma membrane;cell part;cytoplasm;intracellular membrane-bounded organelle;intracellular organelle;intracellular part;macromolecular complex;membrane part;membrane-bounded organelle;nucleus;organelle;plasma membrane part;protein complex	Adipocytokine signaling pathway;Hypertrophic cardiomyopathy (HCM);Insulin signaling pathway;mTOR signaling pathway;Regulation of autophagy	ATP-binding;Autophagy;Biologicalrhythms;Cholesterolbiosynthesis;Cholesterolmetabolism;Chromatinregulator;Completeproteome;Cytoplasm;Fattyacidbiosynthesis;Fattyacidmetabolism;Kinase;Lipidbiosynthesis;Lipidmetabolism;Magnesium;Metal-binding;Nucleotide-binding;Nucleus;Phosphoprotein;Referenceproteome;Serine/threonine-proteinkinase;Steroidbiosynthesis;Steroidmetabolism;Sterolbiosynthesis;Sterolmetabo…	GO:0000302;GO:0001666;GO:0005975;GO:0005996;GO:0006006;GO:0006066;GO:0006082;GO:0006109;GO:0006110;GO:0006139;GO:0006351;GO:0006355;GO:0006461;GO:0006629;GO:0006631;GO:0006633;GO:0006694;GO:0006695;GO:0006807;GO:0006914;GO:0006950;GO:0006979;GO:0007154;GO:0007165;GO:0007166;GO:0008152;GO:0008202;GO:0008203;GO:0008284;GO:0008610;GO:0009056;GO:0009058;GO:0009059;GO:0009266;GO:0009267;GO:0009409;GO:…	GO:0000166;GO:0003682;GO:0003824;GO:0004672;GO:0004674;GO:0004679;GO:0005488;GO:0005524;GO:0016301;GO:0016740;GO:0016772;GO:0016773;GO:0017076;GO:0030554;GO:0032553;GO:0032555;GO:0032559;GO:0035173;GO:0035174;GO:0035639;GO:0043167;GO:0043169;GO:0046872;GO:0047322;GO:0050321;GO:0050405	GO:0005634;GO:0005737;GO:0016324;GO:0031588;GO:0032991;GO:0043226;GO:0043227;GO:0043229;GO:0043231;GO:0043234;GO:0044424;GO:0044425;GO:0044459;GO:0044464
Q8R574	Phosphoribosyl pyrophosphate synthase-associated protein 2	Prpsap2	GEAQDAESDLVDGRHSPPMVRSVAAIHPSLE	S	227	1.4574	1.32794	1.2966	1.32373	*	0.00184563	3	0.429896	0.409195	0.374735	0.404609	74375000	AMP-activated protein kinase substrate motif;ERK1,2 kinase substrate motif;GSK-3, ERK1, ERK2, CDK5 substrate motif;PKA kinase substrate motif;PKC kinase substrate motif;WW domain binding motif	anatomical structure development;biosynthetic process;bone development;cellular biosynthetic process;cellular metabolic process;cellular nitrogen compound biosynthetic process;cellular nitrogen compound metabolic process;cellular process;developmental process;metabolic process;nitrogen compound metabolic process;nucleobase-containing compound biosynthetic process;nucleobase-containing compound me…	binding;catalytic activity;cation binding;diphosphotransferase activity;ion binding;magnesium ion binding;metal ion binding;ribose phosphate diphosphokinase activity;transferase activity;transferase activity, transferring phosphorus-containing groups	macromolecular complex;protein complex;ribose phosphate diphosphokinase complex		Acetylation;Completeproteome;Nucleotidebiosynthesis;Phosphoprotein;Referenceproteome	GO:0006139;GO:0006753;GO:0006807;GO:0008152;GO:0009058;GO:0009117;GO:0009165;GO:0009987;GO:0032502;GO:0034641;GO:0034654;GO:0044237;GO:0044238;GO:0044249;GO:0044271;GO:0044281;GO:0048856;GO:0055086;GO:0060348	GO:0000287;GO:0003824;GO:0004749;GO:0005488;GO:0016740;GO:0016772;GO:0016778;GO:0043167;GO:0043169;GO:0046872	GO:0002189;GO:0032991;GO:0043234
P49769	Presenilin-1;Presenilin-1 NTF subunit;Presenilin-1 CTF subunit;Presenilin-1 CTF12	Psen1	RSTPESRAAVQELSGSILTSEDPEERGVKLG	S	367	1.1543	1.16973	1.24173	1.15724	*	0.00219258	3	0.0935177	0.226179	0.312355	0.210684	5755400	Casein kinase II substrate motif;G protein-coupled receptor kinase 1 substrate motif;GSK3 kinase substrate motif	acidic amino acid transport;activation of immune response;activation of MAPKK activity;activation of protein kinase activity;amine transport;amino acid transport;amyloid precursor protein catabolic process;amyloid precursor protein metabolic process;anagen;anatomical structure development;anatomical structure formation involved in morphogenesis;anatomical structure morphogenesis;anion transport;a…	aspartic-type endopeptidase activity;aspartic-type peptidase activity;calcium channel activity;catalytic activity;cation channel activity;cation transmembrane transporter activity;channel activity;endopeptidase activity;hydrolase activity;ion channel activity;ion transmembrane transporter activity;passive transmembrane transporter activity;peptidase activity;peptidase activity, acting on L-amino …	apical plasma membrane;axon;cell body;cell cortex;cell part;cell projection;cell projection part;cell surface;centrosome;chromosomal part;ciliary rootlet;cilium part;contractile fiber part;cytoplasmic part;cytoplasmic vesicle;cytoskeletal part;dendritic shaft;endoplasmic reticulum;endoplasmic reticulum membrane;endoplasmic reticulum part;gamma-secretase complex;Golgi apparatus;Golgi apparatus par…	Alzheimer's disease;Neurotrophin signaling pathway;Notch signaling pathway;Wnt signaling pathway	Alternativesplicing;Apoptosis;Celladhesion;Completeproteome;Endoplasmicreticulum;Golgiapparatus;Hydrolase;Membrane;Notchsignalingpathway;Phosphoprotein;Protease;Referenceproteome;Transmembrane;Transmembranehelix	GO:0000045;GO:0000122;GO:0000186;GO:0001568;GO:0001708;GO:0001756;GO:0001764;GO:0001775;GO:0001919;GO:0001921;GO:0001932;GO:0001947;GO:0002244;GO:0002252;GO:0002253;GO:0002263;GO:0002285;GO:0002286;GO:0002366;GO:0002376;GO:0002429;GO:0002521;GO:0002573;GO:0002682;GO:0002684;GO:0002757;GO:0002764;GO:0002768;GO:0003002;GO:0003008;GO:0005975;GO:0006355;GO:0006357;GO:0006464;GO:0006468;GO:0006469;GO:…	GO:0003824;GO:0004175;GO:0004190;GO:0005215;GO:0005216;GO:0005261;GO:0005262;GO:0008233;GO:0008324;GO:0015075;GO:0015267;GO:0016787;GO:0022803;GO:0022838;GO:0022857;GO:0022891;GO:0022892;GO:0070001;GO:0070011	GO:0000139;GO:0000776;GO:0005634;GO:0005640;GO:0005743;GO:0005765;GO:0005774;GO:0005783;GO:0005789;GO:0005790;GO:0005791;GO:0005794;GO:0005813;GO:0005815;GO:0005887;GO:0005938;GO:0009986;GO:0016020;GO:0016021;GO:0016324;GO:0019866;GO:0019867;GO:0030018;GO:0030424;GO:0030426;GO:0030427;GO:0031090;GO:0031224;GO:0031226;GO:0031410;GO:0031594;GO:0031965;GO:0031966;GO:0031968;GO:0031982;GO:0032991;GO:…
P29352	Tyrosine-protein phosphatase non-receptor type 22	Ptpn22	NVKLRSPKSDRHQDGSPPPPLPERTLESFFL	S	687	1.2001	1.14622	1.22437	1.15898	*	0.00118435	3	0.149654	0.19688	0.292044	0.212859	9427100	ERK1,2 kinase substrate motif;G protein-coupled receptor kinase 1 substrate motif;GSK-3, ERK1, ERK2, CDK5 substrate motif;WW domain binding motif	activation of immune response;antigen receptor-mediated signaling pathway;biological regulation;cell activation;cell differentiation;cell surface receptor linked signaling pathway;cellular developmental process;cellular metabolic process;cellular process;cellular response to stimulus;dephosphorylation;developmental process;immune response-activating cell surface receptor signaling pathway;immune …	catalytic activity;hydrolase activity;hydrolase activity, acting on ester bonds;phosphatase activity;phosphoprotein phosphatase activity;phosphoric ester hydrolase activity;protein tyrosine phosphatase activity	cell part;cytoplasmic part;internal side of plasma membrane;intracellular membrane-bounded organelle;intracellular organelle;intracellular part;membrane part;membrane-bounded organelle;nucleus;organelle;perinuclear region of cytoplasm;plasma membrane part		3D-structure;Completeproteome;Cytoplasm;Hydrolase;Immunity;Phosphoprotein;Proteinphosphatase;Referenceproteome	GO:0001775;GO:0002253;GO:0002376;GO:0002429;GO:0002521;GO:0002682;GO:0002683;GO:0002684;GO:0002694;GO:0002695;GO:0002757;GO:0002764;GO:0002768;GO:0006793;GO:0006796;GO:0007165;GO:0007166;GO:0008152;GO:0009966;GO:0009968;GO:0009987;GO:0010646;GO:0010648;GO:0016311;GO:0023051;GO:0023057;GO:0030098;GO:0030154;GO:0030217;GO:0032502;GO:0032814;GO:0032817;GO:0032944;GO:0035644;GO:0042110;GO:0042127;GO:…	GO:0003824;GO:0004721;GO:0004725;GO:0016787;GO:0016788;GO:0016791;GO:0042578	GO:0005634;GO:0009898;GO:0043226;GO:0043227;GO:0043229;GO:0043231;GO:0044424;GO:0044425;GO:0044444;GO:0044459;GO:0044464;GO:0048471
Q8BUM3	Tyrosine-protein phosphatase non-receptor type 7	Ptpn7	KAPAKKHVRLQERRGSSVALMLDVQSLGTVE	S	44	1.8405	1.56031	1.9667	1.73476	*	0.00277491	3	0.766597	0.64183	0.975779	0.794736	40455000	14-3-3 domain binding motif;Calmodulin-dependent protein kinase II substrate motif;PAK2 kinase substrate motif;PKA kinase substrate motif;PKC epsilon kinase substrate motif;PKC kinase substrate motif		catalytic activity;hydrolase activity;hydrolase activity, acting on ester bonds;phosphatase activity;phosphoprotein phosphatase activity;phosphoric ester hydrolase activity;protein tyrosine phosphatase activity	cell part;cytoplasmic part;cytoskeleton;cytosol;internal side of plasma membrane;intracellular non-membrane-bounded organelle;intracellular organelle;intracellular part;membrane part;non-membrane-bounded organelle;organelle;plasma membrane part	MAPK signaling pathway	Completeproteome;Cytoplasm;Cytoskeleton;Hydrolase;Oxidation;Phosphoprotein;Proteinphosphatase;Referenceproteome		GO:0003824;GO:0004721;GO:0004725;GO:0016787;GO:0016788;GO:0016791;GO:0042578	GO:0005829;GO:0005856;GO:0009898;GO:0043226;GO:0043228;GO:0043229;GO:0043232;GO:0044424;GO:0044425;GO:0044444;GO:0044459;GO:0044464
Q9ERD6	Ras-specific guanine nucleotide-releasing factor RalGPS2	Ralgps2	SAASREDLAGPDIGASPQGGRKSSAAAAAAA	S	308	1.4488	1.37014	1.34665	1.35193	*	0.000229911	3	0.421358	0.454324	0.429374	0.435018	6186900	ERK1,2 kinase substrate motif;GSK-3, ERK1, ERK2, CDK5 substrate motif;WW domain binding motif	biological regulation;cellular process;cellular response to stimulus;intracellular signal transduction;regulation of biological process;regulation of cellular process;response to stimulus;signal transduction;small GTPase mediated signal transduction	binding;enzyme regulator activity;GTPase regulator activity;guanyl-nucleotide exchange factor activity;lipid binding;nucleoside-triphosphatase regulator activity;phospholipid binding	cell part;cytoplasm;intracellular part;membrane;plasma membrane		Alternativesplicing;Cellmembrane;Completeproteome;Cytoplasm;Guanine-nucleotidereleasingfactor;Membrane;Phosphoprotein;Referenceproteome	GO:0007165;GO:0007264;GO:0009987;GO:0035556;GO:0050789;GO:0050794;GO:0050896;GO:0051716;GO:0065007	GO:0005085;GO:0005488;GO:0005543;GO:0008289;GO:0030234;GO:0030695;GO:0060589	GO:0005737;GO:0005886;GO:0016020;GO:0044424;GO:0044464
Q9CT10	Ran-binding protein 3	Ranbp3	STKFVFGQNMSERVLSPPKLNEANSDTSRET	S	257	1.3496	1.40831	1.4106	1.35326	*	< 0.0001	3	0.319031	0.493961	0.496312	0.436435	8882900	14-3-3 domain binding motif;Calmodulin-dependent protein kinase II substrate motif;Cdc2 kinase substrate motif;CDK kinase substrate motif;CDK1,2,4,6 kinase substrate motif;ERK1,2 kinase substrate motif;GSK-3, ERK1, ERK2, CDK5 substrate motif;PKA kinase substrate motif;PKC kinase substrate motif;WW domain binding motif	establishment of localization;establishment of localization in cell;establishment of protein localization;intracellular transport;protein transport;transport		cell part;cytoplasm;intracellular membrane-bounded organelle;intracellular organelle;intracellular part;membrane-bounded organelle;nucleus;organelle		Acetylation;Completeproteome;Cytoplasm;Nucleus;Phosphoprotein;Proteintransport;Referenceproteome;Transport	GO:0006810;GO:0015031;GO:0045184;GO:0046907;GO:0051234;GO:0051649		GO:0005634;GO:0005737;GO:0043226;GO:0043227;GO:0043229;GO:0043231;GO:0044424;GO:0044464
Q9CQT2	RNA-binding protein 7	Rbm7	TSTSPNSYERTVGNVSPTAQMVQRSFSSPED	S	125	1.5241	1.75839	1.90052	1.67601	*	0.002684	3	0.494457	0.814257	0.926391	0.745035	7020700	Casein kinase II substrate motif;ERK1,2 kinase substrate motif;GSK-3, ERK1, ERK2, CDK5 substrate motif;WW domain binding motif	cell cycle phase;cell cycle process;cellular process;meiosis	binding;nucleic acid binding;nucleotide binding;RNA binding			Completeproteome;Meiosis;Phosphoprotein;Referenceproteome;RNA-binding	GO:0007126;GO:0009987;GO:0022402;GO:0022403	GO:0000166;GO:0003676;GO:0003723;GO:0005488
Q3UZA1	CapZ-interacting protein	Rcsd1	ASEERVADEDRLGQKSPDANMPEEEGVVREK	S	333	1.4254	1.69714	1.53379	1.50806	*	0.00220306	3	0.397866	0.763102	0.617103	0.592691	9783500	ERK1,2 kinase substrate motif;Growth associated histone HI kinase substrate motif;GSK-3, ERK1, ERK2, CDK5 substrate motif;WW domain binding motif	cellular hyperosmotic response;cellular process;cellular response to abiotic stimulus;cellular response to osmotic stress;cellular response to stimulus;cellular response to stress;hyperosmotic response;multicellular organismal process;muscle contraction;muscle system process;response to abiotic stimulus;response to osmotic stress;response to stimulus;response to stress;skeletal muscle contraction…				Alternativesplicing;Completeproteome;Phosphoprotein;Referenceproteome	GO:0003008;GO:0003009;GO:0003012;GO:0006936;GO:0006941;GO:0006950;GO:0006970;GO:0006972;GO:0009628;GO:0009987;GO:0032501;GO:0033554;GO:0050896;GO:0051716;GO:0071214;GO:0071470;GO:0071474
P97492	Regulator of G-protein signaling 14	Rgs14	PKHLGVPNGRMVLAVSDGELTSTAGSQAQGE	S	20	1.8647	1.73179	1.98751	1.8103	*	0.000308767	3	0.785443	0.792267	0.990965	0.856225	10662000	Casein kinase II substrate motif	associative learning;asymmetric cell division;behavior;biological regulation;cell cycle phase;cell cycle process;cell division;cell surface receptor linked signaling pathway;cellular component organization;cellular component organization at cellular level;cellular component organization or biogenesis;cellular component organization or biogenesis at cellular level;cellular process;cellular respons…	binding;cytoskeletal protein binding;enzyme activator activity;enzyme regulator activity;GDP-dissociation inhibitor activity;GTPase activator activity;GTPase regulator activity;microtubule binding;molecular transducer activity;nucleoside-triphosphatase regulator activity;protein binding;protein complex scaffold;receptor signaling complex scaffold activity;receptor signaling protein activity;signa…	cell junction;cell part;centrosome;cytoplasm;cytoplasmic part;cytoskeletal part;cytoskeleton;intermediate filament cytoskeleton;intracellular non-membrane-bounded organelle;intracellular organelle;intracellular organelle part;intracellular part;macromolecular complex;membrane;microtubule;microtubule organizing center;non-membrane-bounded organelle;nuclear body;nuclear part;nucleoplasm part;organe…		3D-structure;Cellcycle;Celldivision;Celljunction;Cellmembrane;Cellprojection;Completeproteome;Cytoplasm;Cytoskeleton;Developmentalprotein;GTPaseactivation;Membrane;Microtubule;Nucleus;Phosphoprotein;Postsynapticcellmembrane;Referenceproteome;Repeat;Signaltransductioninhibitor;Synapse	GO:0000226;GO:0000280;GO:0001932;GO:0003008;GO:0006355;GO:0006469;GO:0006810;GO:0006913;GO:0006950;GO:0006979;GO:0006996;GO:0007010;GO:0007017;GO:0007051;GO:0007059;GO:0007067;GO:0007165;GO:0007166;GO:0007167;GO:0007169;GO:0007186;GO:0007610;GO:0007611;GO:0007612;GO:0007613;GO:0007616;GO:0007632;GO:0008277;GO:0008306;GO:0008356;GO:0008542;GO:0009314;GO:0009416;GO:0009628;GO:0009889;GO:0009966;GO:…	GO:0004871;GO:0005057;GO:0005083;GO:0005092;GO:0005096;GO:0005198;GO:0005488;GO:0005515;GO:0008017;GO:0008047;GO:0008092;GO:0015631;GO:0030159;GO:0030234;GO:0030695;GO:0032947;GO:0060089;GO:0060589	GO:0000922;GO:0005737;GO:0005813;GO:0005815;GO:0005856;GO:0005874;GO:0005886;GO:0014069;GO:0016020;GO:0016604;GO:0016605;GO:0030054;GO:0032991;GO:0043226;GO:0043228;GO:0043229;GO:0043232;GO:0043234;GO:0044422;GO:0044424;GO:0044428;GO:0044430;GO:0044444;GO:0044446;GO:0044451;GO:0044456;GO:0044464;GO:0045111;GO:0045211;GO:0097060
Q9CQJ4	E3 ubiquitin-protein ligase RING2	Rnf2	RTPQEAITDGLEIVVSPRSLHSELMCPICLD	S	41	1.4888	1.58444	1.39487	1.44886	*	0.000864917	3	0.460649	0.663973	0.480129	0.534917	2414600	Casein kinase II substrate motif;ERK1,2 kinase substrate motif;Growth associated histone HI kinase substrate motif;GSK-3, ERK1, ERK2, CDK5 substrate motif;PKA kinase substrate motif;PKC kinase substrate motif;WW domain binding motif	anatomical structure morphogenesis;anterior/posterior axis specification;axis specification;biological regulation;biosynthetic process;cell cycle;cellular biosynthetic process;cellular component organization;cellular component organization at cellular level;cellular component organization or biogenesis;cellular component organization or biogenesis at cellular level;cellular macromolecule biosynth…	acid-amino acid ligase activity;binding;catalytic activity;cation binding;chromatin binding;ion binding;ligase activity;ligase activity, forming carbon-nitrogen bonds;metal ion binding;small conjugating protein ligase activity;transition metal ion binding;ubiquitin-protein ligase activity;zinc ion binding	cell part;chromatin;chromosomal part;heterochromatin;histone methyltransferase complex;intracellular organelle part;intracellular part;macromolecular complex;methyltransferase complex;MLL1 complex;nuclear body;nuclear chromatin;nuclear chromosome part;nuclear heterochromatin;nuclear part;nucleoplasm part;organelle part;PcG protein complex;PRC1 complex;protein complex;sex chromatin;ubiquitin ligas…		3D-structure;Acetylation;Chromosome;Completeproteome;Isopeptidebond;Ligase;Metal-binding;Nucleus;Referenceproteome;Repressor;Transcription;Transcriptionregulation;Ublconjugation;Ublconjugationpathway;Zinc;Zinc-finger	GO:0000122;GO:0000278;GO:0001702;GO:0006139;GO:0006325;GO:0006351;GO:0006355;GO:0006357;GO:0006464;GO:0006513;GO:0006807;GO:0006996;GO:0007049;GO:0007369;GO:0007389;GO:0008152;GO:0009058;GO:0009059;GO:0009653;GO:0009798;GO:0009889;GO:0009890;GO:0009892;GO:0009948;GO:0009987;GO:0010390;GO:0010468;GO:0010556;GO:0010558;GO:0010605;GO:0010629;GO:0016043;GO:0016070;GO:0016567;GO:0016568;GO:0016569;GO:…	GO:0003682;GO:0003824;GO:0004842;GO:0005488;GO:0008270;GO:0016874;GO:0016879;GO:0016881;GO:0019787;GO:0043167;GO:0043169;GO:0046872;GO:0046914	GO:0000151;GO:0000785;GO:0000790;GO:0000792;GO:0001739;GO:0005720;GO:0016604;GO:0031519;GO:0032991;GO:0034708;GO:0035097;GO:0035102;GO:0043234;GO:0044422;GO:0044424;GO:0044427;GO:0044428;GO:0044446;GO:0044451;GO:0044454;GO:0044464;GO:0071339
Q5DTM8	E3 ubiquitin-protein ligase BRE1A	Rnf20	ERKALVVPEPEPDSDSNQERKDDRERGDGQE	S	138	1.4057	1.57643	1.42705	1.42981	*	0.00094177	3	0.377788	0.656658	0.513035	0.515827	25529000	b-Adrenergic Receptor kinase substrate motif;Casein kinase I substrate motif;Casein kinase II substrate motif	biological regulation;catabolic process;cellular catabolic process;cellular component organization;cellular component organization at cellular level;cellular component organization or biogenesis;cellular component organization or biogenesis at cellular level;cellular macromolecule catabolic process;cellular macromolecule metabolic process;cellular metabolic process;cellular process;cellular prote…	acid-amino acid ligase activity;binding;catalytic activity;cation binding;chromatin binding;ion binding;ligase activity;ligase activity, forming carbon-nitrogen bonds;metal ion binding;protein binding transcription factor activity;small conjugating protein ligase activity;transcription coactivator activity;transcription cofactor activity;transcription factor binding transcription factor activity;…	cell part;chromosomal part;HULC complex;intracellular non-membrane-bounded organelle;intracellular organelle;intracellular organelle part;intracellular part;macromolecular complex;non-membrane-bounded organelle;nuclear part;nucleolus;organelle;organelle part;protein complex;ubiquitin conjugating enzyme complex;ubiquitin ligase complex		Acetylation;Alternativesplicing;Chromatinregulator;Coiledcoil;Completeproteome;Ligase;Metal-binding;Nucleus;Phosphoprotein;Referenceproteome;Ublconjugationpathway;Zinc;Zinc-finger	GO:0000209;GO:0006325;GO:0006355;GO:0006464;GO:0006508;GO:0006511;GO:0006513;GO:0006996;GO:0008152;GO:0009056;GO:0009057;GO:0009889;GO:0009891;GO:0009893;GO:0009987;GO:0010390;GO:0010468;GO:0010556;GO:0010557;GO:0010604;GO:0010628;GO:0010638;GO:0016043;GO:0016567;GO:0016568;GO:0016569;GO:0016570;GO:0016574;GO:0019219;GO:0019222;GO:0019538;GO:0019941;GO:0030334;GO:0030336;GO:0031056;GO:0031058;GO:…	GO:0000988;GO:0000989;GO:0003682;GO:0003712;GO:0003713;GO:0003824;GO:0004842;GO:0005488;GO:0008270;GO:0016874;GO:0016879;GO:0016881;GO:0019787;GO:0043167;GO:0043169;GO:0046872;GO:0046914	GO:0000151;GO:0005730;GO:0031371;GO:0032991;GO:0033503;GO:0043226;GO:0043228;GO:0043229;GO:0043232;GO:0043234;GO:0044422;GO:0044424;GO:0044427;GO:0044428;GO:0044446;GO:0044464
Q8BFU3	RING finger protein 214	Rnf214	DGLSPKDSAQKQKNLSPPSVSSQMITKESNR	S	48	1.5909	1.76726	1.46238	1.56055	*	0.00235534	3	0.556343	0.821512	0.548314	0.642056	1309300	Casein kinase II substrate motif;ERK1,2 kinase substrate motif;GSK-3, ERK1, ERK2, CDK5 substrate motif;PKA kinase substrate motif;PKC kinase substrate motif;WW domain binding motif		binding;cation binding;ion binding;metal ion binding;transition metal ion binding;zinc ion binding			Acetylation;Alternativesplicing;Coiledcoil;Completeproteome;Metal-binding;Phosphoprotein;Referenceproteome;Zinc;Zinc-finger		GO:0005488;GO:0008270;GO:0043167;GO:0043169;GO:0046872;GO:0046914
Q8K2Y0	RING finger protein 219	Rnf219	CNNGFKSVEVEGPSKSPQGREFLEEPDKLQE	S	566	1.3995	1.39721	1.57054	1.41592	*	0.0013623	3	0.371411	0.482551	0.651261	0.501741	7757600	ERK1,2 kinase substrate motif;Growth associated histone HI kinase substrate motif;GSK-3, ERK1, ERK2, CDK5 substrate motif;WW domain binding motif		binding;cation binding;ion binding;metal ion binding;transition metal ion binding;zinc ion binding			Alternativesplicing;Coiledcoil;Completeproteome;Metal-binding;Phosphoprotein;Referenceproteome;Zinc;Zinc-finger		GO:0005488;GO:0008270;GO:0043167;GO:0043169;GO:0046872;GO:0046914
Q9DBU5	E3 ubiquitin-protein ligase RNF6	Rnf6	IPLSGVNREHRQQRPSSPVARRTRSQTSMSS	S	182	1.8271	1.67751	1.80403	1.72253	*	< 0.0001	3	0.756055	0.74632	0.851219	0.784531	1864500	DNA dependent Protein kinase substrate motif;G protein-coupled receptor kinase 1 substrate motif;PKA kinase substrate motif;PKC kinase substrate motif	biological regulation;catabolic process;cellular catabolic process;cellular macromolecule catabolic process;cellular macromolecule metabolic process;cellular metabolic process;cellular process;cellular protein metabolic process;macromolecule catabolic process;macromolecule metabolic process;macromolecule modification;metabolic process;modification-dependent macromolecule catabolic process;modific…	acid-amino acid ligase activity;androgen receptor binding;binding;catalytic activity;cation binding;DNA binding;hormone receptor binding;ion binding;ligase activity;ligase activity, forming carbon-nitrogen bonds;metal ion binding;nuclear hormone receptor binding;nucleic acid binding;protein binding;receptor binding;small conjugating protein ligase activity;steroid hormone receptor binding;transit…	axon;cell part;cell projection;cytoplasm;intracellular organelle part;intracellular part;neuron projection;nuclear body;nuclear part;nucleoplasm part;organelle part;PML body		Cellprojection;Completeproteome;Cytoplasm;Ligase;Metal-binding;Nucleus;Referenceproteome;Ublconjugationpathway;Zinc;Zinc-finger	GO:0000209;GO:0001558;GO:0006355;GO:0006464;GO:0006508;GO:0006511;GO:0008152;GO:0009056;GO:0009057;GO:0009889;GO:0009891;GO:0009893;GO:0009966;GO:0009987;GO:0010468;GO:0010556;GO:0010557;GO:0010604;GO:0010628;GO:0010721;GO:0010769;GO:0010975;GO:0016567;GO:0019219;GO:0019222;GO:0019538;GO:0019941;GO:0022603;GO:0022604;GO:0023051;GO:0030308;GO:0030516;GO:0030517;GO:0031323;GO:0031325;GO:0031326;GO:…	GO:0003676;GO:0003677;GO:0003824;GO:0004842;GO:0005102;GO:0005488;GO:0005515;GO:0008270;GO:0016874;GO:0016879;GO:0016881;GO:0019787;GO:0035257;GO:0035258;GO:0043167;GO:0043169;GO:0046872;GO:0046914;GO:0050681;GO:0051427	GO:0005737;GO:0016604;GO:0016605;GO:0030424;GO:0042995;GO:0043005;GO:0044422;GO:0044424;GO:0044428;GO:0044446;GO:0044451;GO:0044464
P18654	Ribosomal protein S6 kinase alpha-3	Rps6ka3	TFYFDPEFTAKTPKDSPGIPPSANAHQLFRG	S	369	1.3481	1.49886	1.59186	1.43794	*	0.00250748	3	0.317427	0.583868	0.670712	0.524002	10145000	b-Adrenergic Receptor kinase substrate motif;ERK1,2 kinase substrate motif;G protein-coupled receptor kinase 1 substrate motif;GSK-3, ERK1, ERK2, CDK5 substrate motif;PKA kinase substrate motif;PKC kinase substrate motif;WW domain binding motif	activation of immune response;activation of innate immune response;biological regulation;cell cycle;cellular process;cellular response to stimulus;immune response-activating signal transduction;immune response-regulating signaling pathway;immune system process;innate immune response-activating signal transduction;intracellular protein kinase cascade;intracellular signal transduction;pattern recog…	adenyl nucleotide binding;adenyl ribonucleotide binding;ATP binding;binding;caspase inhibitor activity;caspase regulator activity;catalytic activity;cation binding;cysteine-type endopeptidase inhibitor activity;endopeptidase inhibitor activity;endopeptidase regulator activity;enzyme inhibitor activity;enzyme regulator activity;ion binding;kinase activity;magnesium ion binding;metal ion binding;nu…	cell part;cytoplasm;intracellular membrane-bounded organelle;intracellular organelle;intracellular part;membrane-bounded organelle;nucleus;organelle	Long-term potentiation;MAPK signaling pathway;mTOR signaling pathway;Neurotrophin signaling pathway;Oocyte meiosis;Progesterone-mediated oocyte maturation	3D-structure;ATP-binding;Cellcycle;Completeproteome;Cytoplasm;Kinase;Nucleotide-binding;Nucleus;Phosphoprotein;Referenceproteome;Repeat;Serine/threonine-proteinkinase;Stressresponse;Transferase	GO:0002218;GO:0002221;GO:0002224;GO:0002237;GO:0002253;GO:0002376;GO:0002682;GO:0002684;GO:0002757;GO:0002758;GO:0002764;GO:0006355;GO:0006357;GO:0006950;GO:0007049;GO:0007165;GO:0007243;GO:0009607;GO:0009889;GO:0009891;GO:0009893;GO:0009987;GO:0010033;GO:0010468;GO:0010556;GO:0010557;GO:0010604;GO:0010628;GO:0019219;GO:0019222;GO:0031323;GO:0031325;GO:0031326;GO:0031328;GO:0031347;GO:0031349;GO:…	GO:0000166;GO:0000287;GO:0003824;GO:0004672;GO:0004674;GO:0004857;GO:0004866;GO:0004869;GO:0005488;GO:0005524;GO:0016301;GO:0016740;GO:0016772;GO:0016773;GO:0017076;GO:0030234;GO:0030414;GO:0030554;GO:0032553;GO:0032555;GO:0032559;GO:0035639;GO:0043027;GO:0043028;GO:0043167;GO:0043169;GO:0046872;GO:0061134;GO:0061135	GO:0005634;GO:0005737;GO:0043226;GO:0043227;GO:0043229;GO:0043231;GO:0044424;GO:0044464
Q80U72	Protein scribble homolog	Scrib	TAKAERRHQERLRMQSPELPAPERALSPAER	S	1457	1.3676	1.48431	1.35106	1.36353	*	0.000668057	3	0.338146	0.569789	0.434097	0.447344	10084000	14-3-3 domain binding motif;Akt kinase substrate motif;Calmodulin-dependent protein kinase II substrate motif;Casein kinase II substrate motif;ERK1,2 kinase substrate motif;G protein-coupled receptor kinase 1 substrate motif;GSK-3, ERK1, ERK2, CDK5 substrate motif;MAPKAPK1 kinase substrate motif;PKA kinase substrate motif;PKC kinase substrate motif;WW domain binding motif	activation of Rac GTPase activity;activation of Ras GTPase activity;activation of Rho GTPase activity;anatomical structure formation involved in morphogenesis;anatomical structure morphogenesis;apoptosis;apoptosis involved in morphogenesis;asymmetric protein localization;biological adhesion;biological regulation;cell adhesion;cell death;cell migration;cell motility;cell proliferation;cell-cell ad…		adherens junction;anchoring junction;basolateral plasma membrane;cell junction;cell leading edge;cell part;cell-cell adherens junction;cell-cell junction;cytoplasmic part;intracellular part;macromolecular complex;membrane;membrane part;myelin sheath abaxonal region;plasma membrane part;postsynaptic membrane;presynaptic membrane;protein complex;Scrib-APC-beta-catenin complex;synapse part;synaptic …		Alternativesplicing;Celljunction;Cellmembrane;Coiledcoil;Completeproteome;Cytoplasm;Developmentalprotein;Differentiation;Leucine-richrepeat;Membrane;Phosphoprotein;Referenceproteome;Repeat;Ublconjugation	GO:0001843;GO:0001919;GO:0001921;GO:0002009;GO:0006140;GO:0006810;GO:0006897;GO:0006903;GO:0006915;GO:0006928;GO:0006935;GO:0006950;GO:0007155;GO:0007163;GO:0007346;GO:0008104;GO:0008105;GO:0008219;GO:0008283;GO:0009605;GO:0009611;GO:0009653;GO:0009893;GO:0009894;GO:0009987;GO:0010324;GO:0010604;GO:0010623;GO:0010941;GO:0010942;GO:0012501;GO:0016043;GO:0016044;GO:0016080;GO:0016192;GO:0016265;GO:…		GO:0005911;GO:0005912;GO:0005913;GO:0016020;GO:0016323;GO:0030054;GO:0031252;GO:0032991;GO:0034750;GO:0035748;GO:0042734;GO:0043234;GO:0044424;GO:0044425;GO:0044444;GO:0044456;GO:0044459;GO:0044464;GO:0045211;GO:0070161;GO:0097060
Q6P4S6	Serine/threonine-protein kinase SIK3	Sik3	MAPFSYGHRPLSKQLSADSAEAHSLNMNRFS	S	856	1.5235	1.51768	1.64536	1.52068	*	0.000173906	3	0.493889	0.601872	0.718401	0.60472	4476200	Calmodulin-dependent protein kinase II substrate motif;Casein kinase II substrate motif;Chk1 kinase substrate motif;G protein-coupled receptor kinase 1 substrate motif;MAPKAPK2 kinase substrate motif;PKA kinase substrate motif;PKC kinase substrate motif		adenyl nucleotide binding;adenyl ribonucleotide binding;ATP binding;binding;catalytic activity;cation binding;ion binding;kinase activity;magnesium ion binding;metal ion binding;nucleotide binding;phosphotransferase activity, alcohol group as acceptor;protein kinase activity;protein serine/threonine kinase activity;purine nucleotide binding;purine ribonucleoside triphosphate binding;purine ribonu…	cell part;cytoplasm;intracellular part		Alternativesplicing;ATP-binding;Completeproteome;Cytoplasm;Kinase;Magnesium;Metal-binding;Nucleotide-binding;Phosphoprotein;Referenceproteome;Serine/threonine-proteinkinase;Transferase		GO:0000166;GO:0000287;GO:0003824;GO:0004672;GO:0004674;GO:0005488;GO:0005524;GO:0016301;GO:0016740;GO:0016772;GO:0016773;GO:0017076;GO:0030554;GO:0032553;GO:0032555;GO:0032559;GO:0035639;GO:0043167;GO:0043169;GO:0046872	GO:0005737;GO:0044424;GO:0044464
Q8CI08	SLAIN motif-containing protein 2	Slain2	STRRGTFSDQELDAQSLDDEDDSLQHAVHPA	S	324	1.9847	2.41414	2.04319	2.08385	*	0.00103521	3	0.87542	1.27151	1.03083	1.05925	8722900	Casein kinase I substrate motif;Casein kinase II substrate motif;Pyruvate dehydrogenase kinase substrate motif	biological regulation;cellular component organization;cellular component organization at cellular level;cellular component organization or biogenesis;cellular component organization or biogenesis at cellular level;cellular process;cytoplasmic microtubule organization;cytoskeleton organization;microtubule cytoskeleton organization;microtubule nucleation;microtubule-based process;organelle organiza…		cell part;centrosome;cytoplasm;cytoplasmic part;cytoskeletal part;cytoskeleton;intracellular non-membrane-bounded organelle;intracellular organelle;intracellular organelle part;intracellular part;microtubule cytoskeleton;microtubule organizing center;microtubule plus end;non-membrane-bounded organelle;organelle;organelle part		Acetylation;Alternativesplicing;Coiledcoil;Completeproteome;Cytoplasm;Cytoskeleton;Phosphoprotein;Referenceproteome	GO:0000226;GO:0006996;GO:0007010;GO:0007017;GO:0007020;GO:0009987;GO:0010638;GO:0016043;GO:0031110;GO:0031112;GO:0031113;GO:0031116;GO:0031122;GO:0031334;GO:0032271;GO:0032273;GO:0032886;GO:0033043;GO:0043254;GO:0044087;GO:0048518;GO:0048522;GO:0050789;GO:0050794;GO:0051128;GO:0051130;GO:0051493;GO:0051495;GO:0065007;GO:0070507;GO:0071840;GO:0071841;GO:0071842		GO:0005737;GO:0005813;GO:0005815;GO:0005856;GO:0015630;GO:0035371;GO:0043226;GO:0043228;GO:0043229;GO:0043232;GO:0044422;GO:0044424;GO:0044430;GO:0044444;GO:0044446;GO:0044464
Q8BTY2	Sodium bicarbonate cotransporter 3	Slc4a7	LVRSFADIGILASPQSAPGNLDNSKSGEMKG	S	250	1.6955	1.9414	1.56572	1.68262	*	0.00263326	3	0.64821	0.957097	0.646825	0.750711	1922900		anatomical structure development;anatomical structure morphogenesis;auditory receptor cell development;cation transport;cell death;cell development;cellular developmental process;cellular process;cochlear nucleus development;death;developmental process;developmental programmed cell death;establishment of localization;inner ear receptor cell development;ion transport;metal ion transport;monovalent…	active transmembrane transporter activity;anion transmembrane transporter activity;anion:anion antiporter activity;antiporter activity;inorganic anion exchanger activity;ion transmembrane transporter activity;secondary active transmembrane transporter activity;solute:solute antiporter activity;substrate-specific transmembrane transporter activity;substrate-specific transporter activity;symporter …	apical plasma membrane;basolateral plasma membrane;cell part;cell projection;cytoplasm;integral to membrane;intracellular part;intrinsic to membrane;membrane part;microvillus;organelle part;plasma membrane part;stereocilium		Alternativesplicing;Cellmembrane;Cellprojection;Completeproteome;Glycoprotein;Iontransport;Membrane;Phosphoprotein;Referenceproteome;Sodium;Sodiumtransport;Symport;Transmembrane;Transmembranehelix;Transport	GO:0006810;GO:0006811;GO:0006812;GO:0006814;GO:0008219;GO:0009653;GO:0009987;GO:0010623;GO:0012501;GO:0015672;GO:0016265;GO:0021747;GO:0030001;GO:0032502;GO:0046666;GO:0048468;GO:0048666;GO:0048856;GO:0048857;GO:0048869;GO:0051234;GO:0060117;GO:0060119;GO:0061299	GO:0005215;GO:0005452;GO:0008509;GO:0015075;GO:0015291;GO:0015293;GO:0015297;GO:0015300;GO:0015301;GO:0022804;GO:0022857;GO:0022891;GO:0022892	GO:0005737;GO:0005902;GO:0016021;GO:0016323;GO:0016324;GO:0031224;GO:0032420;GO:0042995;GO:0044422;GO:0044424;GO:0044425;GO:0044459;GO:0044464
Q7TN29	Stromal membrane-associated protein 2	Smap2	SRKAVGSMPTAGSAGSVPENLNLFPEPGSKS	S	239	1.4283	1.41509	1.43395	1.38885	*	< 0.0001	3	0.400799	0.50089	0.519996	0.473895	3510500	Casein kinase II substrate motif	biological regulation;positive regulation of catalytic activity;positive regulation of GTPase activity;positive regulation of hydrolase activity;positive regulation of molecular function;regulation of ARF GTPase activity;regulation of biological process;regulation of catabolic process;regulation of catalytic activity;regulation of cellular catabolic process;regulation of cellular metabolic proces…	ARF GTPase activator activity;binding;cation binding;enzyme activator activity;enzyme regulator activity;GTPase activator activity;GTPase regulator activity;ion binding;metal ion binding;nucleoside-triphosphatase regulator activity;small GTPase regulator activity;transition metal ion binding;zinc ion binding	cell part;cytoplasm;intracellular membrane-bounded organelle;intracellular organelle;intracellular part;membrane-bounded organelle;nucleus;organelle	Endocytosis	Alternativesplicing;Completeproteome;Cytoplasm;GTPaseactivation;Metal-binding;Phosphoprotein;Referenceproteome;Zinc;Zinc-finger	GO:0006140;GO:0009894;GO:0019219;GO:0019222;GO:0030811;GO:0031323;GO:0031329;GO:0032312;GO:0032318;GO:0033121;GO:0033124;GO:0043085;GO:0043087;GO:0043547;GO:0044093;GO:0050789;GO:0050790;GO:0050794;GO:0051171;GO:0051336;GO:0051345;GO:0065007;GO:0065009;GO:0080090	GO:0005083;GO:0005096;GO:0005488;GO:0008047;GO:0008060;GO:0008270;GO:0030234;GO:0030695;GO:0043167;GO:0043169;GO:0046872;GO:0046914;GO:0060589	GO:0005634;GO:0005737;GO:0043226;GO:0043227;GO:0043229;GO:0043231;GO:0044424;GO:0044464
Q64337	Sequestosome-1	Sqstm1	YLLGKEEATREIRRFSFCFSPEPEAEAQAAA	S	24	1.656	1.7272	1.8323	1.69204	*	0.000134351	3	0.614202	0.788431	0.873653	0.758762	4439900	14-3-3 domain binding motif;Calmodulin-dependent protein kinase II substrate motif;G protein-coupled receptor kinase 1 substrate motif;GSK3 kinase substrate motif;PAK2 kinase substrate motif;PKA kinase substrate motif;PKC epsilon kinase substrate motif;PKC kinase substrate motif	apoptosis;autophagy;biological regulation;catabolic process;cell communication;cell death;cell differentiation;cellular catabolic process;cellular component assembly;cellular component organization;cellular component organization or biogenesis;cellular developmental process;cellular metabolic process;cellular process;cellular response to external stimulus;cellular response to extracellular stimul…	binding;cation binding;enzyme binding;identical protein binding;ion binding;K63-linked polyubiquitin binding;kinase binding;metal ion binding;polyubiquitin binding;protein binding;protein binding transcription factor activity;protein domain specific binding;protein kinase binding;protein kinase C binding;SH2 domain binding;small conjugating protein binding;transcription cofactor activity;transcri…	aggresome;autophagic vacuole;cell part;cytoplasmic mRNA processing body;cytoplasmic part;cytoplasmic vesicle;endoplasmic reticulum;endosome;inclusion body;intracellular membrane-bounded organelle;intracellular non-membrane-bounded organelle;intracellular organelle;intracellular part;late endosome;lysosome;lytic vacuole;macromolecular complex;membrane-bounded organelle;non-membrane-bounded organel…	Osteoclast differentiation	3D-structure;Alternativesplicing;Apoptosis;Autophagy;Completeproteome;Cytoplasm;Cytoplasmicvesicle;Differentiation;Endoplasmicreticulum;Endosome;Immunity;Lysosome;Metal-binding;Nucleus;Phosphoprotein;Referenceproteome;Zinc;Zinc-finger	GO:0001932;GO:0001934;GO:0006461;GO:0006914;GO:0006915;GO:0006950;GO:0007154;GO:0008152;GO:0008219;GO:0009056;GO:0009267;GO:0009605;GO:0009893;GO:0009966;GO:0009987;GO:0009991;GO:0010562;GO:0010604;GO:0010627;GO:0012501;GO:0016043;GO:0016236;GO:0016265;GO:0019220;GO:0019222;GO:0022607;GO:0023051;GO:0030154;GO:0031323;GO:0031325;GO:0031399;GO:0031401;GO:0031667;GO:0031668;GO:0031669;GO:0032268;GO:…	GO:0000988;GO:0000989;GO:0003712;GO:0005080;GO:0005488;GO:0005515;GO:0008270;GO:0019899;GO:0019900;GO:0019901;GO:0019904;GO:0031593;GO:0032182;GO:0042169;GO:0042802;GO:0043130;GO:0043167;GO:0043169;GO:0046872;GO:0046914;GO:0070530	GO:0000323;GO:0000407;GO:0000932;GO:0005634;GO:0005764;GO:0005768;GO:0005770;GO:0005773;GO:0005776;GO:0005783;GO:0016234;GO:0016235;GO:0030529;GO:0031410;GO:0031982;GO:0032991;GO:0035770;GO:0043226;GO:0043227;GO:0043228;GO:0043229;GO:0043231;GO:0043232;GO:0044424;GO:0044444;GO:0044464
P42230	Signal transducer and activator of transcription 5A	Stat5a	LYNEQRLVREANNCSSPAGVLVDAMSQKHLQ	S	128	1.6098	1.74246	1.8156	1.67596	*	0.000276672	3	0.573381	0.801127	0.860445	0.744984	21142000	ERK1,2 kinase substrate motif;GSK-3, ERK1, ERK2, CDK5 substrate motif;MDC1 BRCT domain binding motif;Plk1 PBD domain binding motif;WW domain binding motif	2-oxoglutarate metabolic process;allantoin metabolic process;amine metabolic process;anatomical structure development;anatomical structure morphogenesis;biological regulation;biosynthetic process;body fluid secretion;branched chain family amino acid metabolic process;carboxylic acid metabolic process;cell activation;cell differentiation;cell surface receptor linked signaling pathway;cellular amid…	binding;calcium ion binding;cation binding;core promoter binding;core promoter sequence-specific DNA binding;DNA binding;ion binding;metal ion binding;molecular transducer activity;nucleic acid binding;nucleic acid binding transcription factor activity;regulatory region DNA binding;regulatory region nucleic acid binding;RNA polymerase II core promoter sequence-specific DNA binding;RNA polymerase …	cell part;cytoplasmic part;cytosol;intracellular membrane-bounded organelle;intracellular organelle;intracellular part;membrane-bounded organelle;nucleus;organelle	Acute myeloid leukemia;Chronic myeloid leukemia;ErbB signaling pathway;Jak-STAT signaling pathway;ko05152;Measles;Pathways in cancer	3D-structure;Activator;Completeproteome;Cytoplasm;DNA-binding;Lactation;Nucleus;Phosphoprotein;Referenceproteome;SH2domain;Transcription;Transcriptionregulation	GO:0000255;GO:0001553;GO:0001775;GO:0001776;GO:0001779;GO:0001817;GO:0001910;GO:0001912;GO:0002009;GO:0002260;GO:0002376;GO:0002521;GO:0002682;GO:0002684;GO:0002694;GO:0002696;GO:0002697;GO:0002699;GO:0002703;GO:0002705;GO:0002706;GO:0002708;GO:0002715;GO:0002717;GO:0002761;GO:0002763;GO:0003006;GO:0006082;GO:0006101;GO:0006103;GO:0006105;GO:0006107;GO:0006139;GO:0006351;GO:0006355;GO:0006357;GO:…	GO:0000975;GO:0000976;GO:0000977;GO:0000979;GO:0001012;GO:0001046;GO:0001047;GO:0001067;GO:0001071;GO:0003676;GO:0003677;GO:0003700;GO:0004871;GO:0005488;GO:0005509;GO:0043167;GO:0043169;GO:0043565;GO:0044212;GO:0046872;GO:0060089	GO:0005634;GO:0005829;GO:0043226;GO:0043227;GO:0043229;GO:0043231;GO:0044424;GO:0044444;GO:0044464
P58404	Striatin-4	Strn4	VLEQIPFLQNCEDEDSDEDDELDSVQHKKQR	S	276	2.1581	2.4075	2.01244	2.13009	*	0.000493716	3	0.996261	1.26754	1.00894	1.09091	8502400	b-Adrenergic Receptor kinase substrate motif;Casein kinase I substrate motif;Casein kinase II substrate motif;Pyruvate dehydrogenase kinase substrate motif			cell part;cell projection;cell projection part;cytoplasm;dendritic spine;intracellular part;macromolecular complex;membrane;neuron projection;neuron spine;protein complex		Alternativesplicing;Calmodulin-binding;Cellprojection;Coiledcoil;Completeproteome;Cytoplasm;Membrane;Phosphoprotein;Referenceproteome;Repeat;WDrepeat			GO:0005737;GO:0016020;GO:0032991;GO:0042995;GO:0043005;GO:0043197;GO:0043234;GO:0044309;GO:0044424;GO:0044463;GO:0044464
P70452	Syntaxin-4	Stx4	KAIEPQKEEADENYNSVNTRMKKTQHGVLSQ	S	117	2.232	2.57211	2.09446	2.23167	*	0.000790461	3	1.04484	1.36295	1.06658	1.15812	37710000	Casein kinase II substrate motif	cellular process;establishment of localization;establishment of localization in cell;establishment of protein localization;exocytosis;intracellular protein transport;intracellular transport;protein transport;secretion;secretion by cell;synaptic vesicle exocytosis;synaptic vesicle transport;transport;vesicle-mediated transport		basolateral plasma membrane;cell part;cell surface;cytoplasmic membrane-bounded vesicle;cytoplasmic part;cytoplasmic vesicle;Golgi apparatus part;integral to membrane;intracellular membrane-bounded organelle;intracellular organelle;intracellular organelle part;intracellular part;intrinsic to membrane;lateral loop;macromolecular complex;membrane part;membrane-bounded organelle;membrane-bounded ves…	SNARE interactions in vesicular transport;Vasopressin-regulated water reabsorption	3D-structure;Cellmembrane;Coiledcoil;Completeproteome;Membrane;Neurotransmittertransport;Phosphoprotein;Referenceproteome;Transmembrane;Transmembranehelix;Transport	GO:0006810;GO:0006886;GO:0006887;GO:0009987;GO:0015031;GO:0016079;GO:0016192;GO:0032940;GO:0045184;GO:0046903;GO:0046907;GO:0048489;GO:0051234;GO:0051649		GO:0005802;GO:0009986;GO:0016021;GO:0016023;GO:0016323;GO:0030141;GO:0031201;GO:0031224;GO:0031410;GO:0031982;GO:0031988;GO:0032991;GO:0035749;GO:0042581;GO:0043219;GO:0043226;GO:0043227;GO:0043229;GO:0043231;GO:0043234;GO:0044422;GO:0044424;GO:0044425;GO:0044431;GO:0044444;GO:0044446;GO:0044459;GO:0044464;GO:0048471
O70439	Syntaxin-7	Stx7	VEIQRTLNQLGTPQDSPELRQLLQQKQQYTN	S	45	1.75	1.8663	1.62419	1.69888	*	0.000434957	3	0.693854	0.900181	0.699721	0.764586	1077800	b-Adrenergic Receptor kinase substrate motif;Casein kinase II substrate motif;ERK1,2 kinase substrate motif;GSK-3, ERK1, ERK2, CDK5 substrate motif;WW domain binding motif	cellular process;establishment of localization;establishment of localization in cell;establishment of protein localization;exocytosis;intracellular protein transport;intracellular transport;protein transport;secretion;secretion by cell;synaptic vesicle exocytosis;synaptic vesicle transport;transport;vesicle-mediated transport	binding;protein binding;SNAP receptor activity;SNARE binding	cell part;cytoplasmic part;early endosome membrane;endosomal part;endosome membrane;integral to membrane;intracellular organelle part;intracellular part;intrinsic to membrane;macromolecular complex;membrane;membrane part;organelle membrane;organelle part;perinuclear region of cytoplasm;protein complex;SNARE complex		3D-structure;Acetylation;Coiledcoil;Completeproteome;Endosome;Iron;Membrane;Phosphoprotein;Referenceproteome;Transmembrane;Transmembranehelix	GO:0006810;GO:0006886;GO:0006887;GO:0009987;GO:0015031;GO:0016079;GO:0016192;GO:0032940;GO:0045184;GO:0046903;GO:0046907;GO:0048489;GO:0051234;GO:0051649	GO:0000149;GO:0005484;GO:0005488;GO:0005515	GO:0010008;GO:0016020;GO:0016021;GO:0031090;GO:0031201;GO:0031224;GO:0031901;GO:0032991;GO:0043234;GO:0044422;GO:0044424;GO:0044425;GO:0044440;GO:0044444;GO:0044446;GO:0044464;GO:0048471
Q62311	Transcription initiation factor TFIID subunit 6	Taf6	PGTPKANGSQPTGPGSPQPAL__________	S	673	1.7169	2.04836	1.99487	1.8648	*	0.000860175	3	0.666306	1.03447	0.996297	0.899024	8094400	ERK1,2 kinase substrate motif;G protein-coupled receptor kinase 1 substrate motif;GSK-3, ERK1, ERK2, CDK5 substrate motif;WW domain binding motif	biological regulation;biosynthetic process;cellular biosynthetic process;cellular macromolecule metabolic process;cellular metabolic process;cellular nitrogen compound metabolic process;cellular process;macromolecule metabolic process;metabolic process;negative regulation of biological process;negative regulation of cell cycle;negative regulation of cell proliferation;negative regulation of cellu…	binding;DNA binding;nucleic acid binding;nucleic acid binding transcription factor activity;sequence-specific DNA binding transcription factor activity	cell part;cytoplasm;histone acetyltransferase complex;histone methyltransferase complex;intracellular organelle part;intracellular part;macromolecular complex;methyltransferase complex;MLL1 complex;nuclear part;nucleoplasm part;organelle part;protein complex;SAGA-type complex;transcription factor complex;transcription factor TFIID complex;transcription factor TFTC complex	Basal transcription factors	Completeproteome;Nucleus;Phosphoprotein;Referenceproteome;Transcription;Transcriptionregulation	GO:0006139;GO:0006352;GO:0006355;GO:0006367;GO:0006807;GO:0008152;GO:0008285;GO:0009058;GO:0009889;GO:0009987;GO:0010468;GO:0010556;GO:0016070;GO:0019219;GO:0019222;GO:0031323;GO:0031326;GO:0032774;GO:0034641;GO:0042127;GO:0043170;GO:0044237;GO:0044238;GO:0044249;GO:0044260;GO:0045786;GO:0048519;GO:0048523;GO:0050789;GO:0050794;GO:0051090;GO:0051171;GO:0051252;GO:0051726;GO:0060255;GO:0065007;GO:…	GO:0001071;GO:0003676;GO:0003677;GO:0003700;GO:0005488	GO:0000123;GO:0005667;GO:0005669;GO:0005737;GO:0032991;GO:0033276;GO:0034708;GO:0035097;GO:0043234;GO:0044422;GO:0044424;GO:0044428;GO:0044446;GO:0044451;GO:0044464;GO:0070461;GO:0071339
Q62312	TGF-beta receptor type-2	Tgfbr2	FSELEHPERLSGRSCSQEKIPEDGSLNTTK_	S	578	1.6522	1.59108	1.55826	1.55863	*	< 0.0001	3	0.610888	0.670004	0.639933	0.640275	11104000	14-3-3 domain binding motif;ATM kinase substrate motif;Calmodulin-dependent protein kinase II substrate motif;Casein kinase II substrate motif;DNA dependent Protein kinase substrate motif;PKA kinase substrate motif;PKC kinase substrate motif	activation of protein kinase activity;aging;anatomical structure development;anatomical structure formation involved in morphogenesis;anatomical structure morphogenesis;biological regulation;brain development;branching morphogenesis of a tube;bronchus morphogenesis;cartilage development;cell activation;cell differentiation;cell surface receptor linked signaling pathway;cellular component organiza…	adenyl nucleotide binding;adenyl ribonucleotide binding;ATP binding;binding;carbohydrate binding;catalytic activity;cation binding;glycosaminoglycan binding;ion binding;kinase activity;metal ion binding;molecular transducer activity;nucleotide binding;pattern binding;phosphotransferase activity, alcohol group as acceptor;polysaccharide binding;protein binding;protein kinase activity;protein serin…	caveola;cell part;cytoplasmic part;cytosol;external side of plasma membrane;integral to membrane;integral to plasma membrane;intracellular part;intrinsic to membrane;intrinsic to plasma membrane;macromolecular complex;membrane part;membrane raft;plasma membrane part;protein complex;receptor complex	Adherens junction;Chagas disease (American trypanosomiasis);Chronic myeloid leukemia;Colorectal cancer;Cytokine-cytokine receptor interaction;Endocytosis;MAPK signaling pathway;Osteoclast differentiation;Pancreatic cancer;Pathways in cancer;TGF-beta signaling pathway	Alternativesplicing;Apoptosis;ATP-binding;Cellmembrane;Completeproteome;Differentiation;Disulfidebond;Glycoprotein;Growthregulation;Kinase;Magnesium;Manganese;Membrane;Metal-binding;Nucleotide-binding;Phosphoprotein;Receptor;Referenceproteome;Serine/threonine-proteinkinase;Signal;Transferase;Transmembrane;Transmembranehelix	GO:0001569;GO:0001570;GO:0001701;GO:0001763;GO:0001773;GO:0001775;GO:0001932;GO:0002009;GO:0002053;GO:0002088;GO:0002274;GO:0002376;GO:0002521;GO:0002573;GO:0002643;GO:0002645;GO:0002649;GO:0002651;GO:0002661;GO:0002663;GO:0002664;GO:0002666;GO:0002682;GO:0002684;GO:0002694;GO:0002696;GO:0006464;GO:0006468;GO:0006793;GO:0006796;GO:0006810;GO:0006897;GO:0006898;GO:0006950;GO:0007165;GO:0007166;GO:…	GO:0000166;GO:0001871;GO:0003824;GO:0004672;GO:0004674;GO:0004675;GO:0004702;GO:0004871;GO:0004872;GO:0004888;GO:0005024;GO:0005026;GO:0005057;GO:0005488;GO:0005515;GO:0005524;GO:0005539;GO:0016301;GO:0016740;GO:0016772;GO:0016773;GO:0017076;GO:0019199;GO:0030246;GO:0030247;GO:0030554;GO:0032553;GO:0032555;GO:0032559;GO:0035639;GO:0038023;GO:0043167;GO:0043169;GO:0046332;GO:0046872;GO:0060089	GO:0005829;GO:0005887;GO:0005901;GO:0009897;GO:0016021;GO:0031224;GO:0031226;GO:0032991;GO:0043234;GO:0043235;GO:0044424;GO:0044425;GO:0044444;GO:0044459;GO:0044464;GO:0045121
O35714	Tumor necrosis factor receptor superfamily member 18	Tnfrsf18	TQPFAEVQLSAEDACSFQFPEEERGEQTEEK	S	205	1.9523	2.11464	1.74119	1.87998	*	0.000979017	3	0.851674	1.08041	0.800071	0.910719	61906000	Casein kinase I substrate motif;G protein-coupled receptor kinase 1 substrate motif	apoptosis;cell death;cellular process;death;programmed cell death		cell part;external side of plasma membrane;extracellular region;integral to membrane;integral to plasma membrane;intrinsic to membrane;intrinsic to plasma membrane;membrane part;plasma membrane part	Cytokine-cytokine receptor interaction	Alternativesplicing;Apoptosis;Cellmembrane;Completeproteome;Disulfidebond;Glycoprotein;Membrane;Receptor;Referenceproteome;Repeat;Secreted;Signal;Transmembrane;Transmembranehelix	GO:0006915;GO:0008219;GO:0009987;GO:0012501;GO:0016265		GO:0005576;GO:0005887;GO:0009897;GO:0016021;GO:0031224;GO:0031226;GO:0044425;GO:0044459;GO:0044464
P70399	Tumor suppressor p53-binding protein 1	Tp53bp1	TKRTDASSSTLRRSDSPEIPFQAATGSSDGL	S	1459	1.4692	1.41878	1.65911	1.47311	*	0.00213665	3	0.44153	0.504655	0.730411	0.558866	32623000	14-3-3 domain binding motif;b-Adrenergic Receptor kinase substrate motif;Calmodulin-dependent protein kinase II substrate motif;Calmodulin-dependent protein kinase IV substrate motif;Casein kinase II substrate motif;Chk1 kinase substrate motif;ERK1,2 kinase substrate motif;G protein-coupled receptor kinase 1 substrate motif;GSK-3, ERK1, ERK2, CDK5 substrate motif;PKA kinase substrate motif;PKC ki…	biological regulation;biosynthetic process;cellular biosynthetic process;cellular macromolecule biosynthetic process;cellular macromolecule metabolic process;cellular metabolic process;cellular nitrogen compound metabolic process;cellular process;cellular response to stimulus;cellular response to stress;DNA metabolic process;DNA repair;macromolecule biosynthetic process;macromolecule metabolic pr…	binding;damaged DNA binding;DNA binding;histone binding;methylated histone residue binding;nucleic acid binding;protein binding;sequence-specific DNA binding;telomeric DNA binding;transcription factor binding	cell part;chromosomal part;condensed chromosome kinetochore;intracellular membrane-bounded organelle;intracellular non-membrane-bounded organelle;intracellular organelle;intracellular organelle part;intracellular part;kinetochore;macromolecular complex;membrane-bounded organelle;non-membrane-bounded organelle;nucleus;organelle;organelle part;protein complex;replication fork		3D-structure;Activator;Alternativesplicing;Centromere;Chromosome;Completeproteome;DNA-binding;DNAdamage;DNArepair;Kinetochore;Methylation;Nucleus;Phosphoprotein;Referenceproteome;Repeat;Transcription;Transcriptionregulation	GO:0006139;GO:0006259;GO:0006281;GO:0006351;GO:0006355;GO:0006807;GO:0006950;GO:0006974;GO:0008152;GO:0009058;GO:0009059;GO:0009889;GO:0009987;GO:0010468;GO:0010556;GO:0016070;GO:0019219;GO:0019222;GO:0031323;GO:0031326;GO:0032774;GO:0033554;GO:0034641;GO:0034645;GO:0043170;GO:0044237;GO:0044238;GO:0044249;GO:0044260;GO:0050789;GO:0050794;GO:0050896;GO:0051171;GO:0051252;GO:0051716;GO:0060255;GO:…	GO:0003676;GO:0003677;GO:0003684;GO:0005488;GO:0005515;GO:0008134;GO:0035064;GO:0042162;GO:0042393;GO:0043565	GO:0000776;GO:0000777;GO:0005634;GO:0005657;GO:0032991;GO:0043226;GO:0043227;GO:0043228;GO:0043229;GO:0043231;GO:0043232;GO:0043234;GO:0044422;GO:0044424;GO:0044427;GO:0044446;GO:0044464
A2AI08	Taperin	Tprn	PVRPGLPVTFIDEVDSEEEAFQEAKLPSSAV	S	501	1.4473	1.72805	1.69647	1.577	*	0.00216049	3	0.419864	0.789144	0.762536	0.657181	4565800	b-Adrenergic Receptor kinase substrate motif;BARD1 BRCT domain binding motif;Casein kinase I substrate motif;Casein kinase II substrate motif;G protein-coupled receptor kinase 1 substrate motif	multicellular organismal process;neurological system process;sensory perception;sensory perception of mechanical stimulus;sensory perception of sound;system process		cell part;cell projection;intracellular part;microvillus;organelle part;stereocilium		Cellprojection;Completeproteome;Hearing;Phosphoprotein;Referenceproteome	GO:0003008;GO:0007600;GO:0007605;GO:0032501;GO:0050877;GO:0050954		GO:0005902;GO:0032420;GO:0042995;GO:0044422;GO:0044424;GO:0044464
Q3TLI0	Trafficking protein particle complex subunit 10	Trappc10	CRNVHMLLRRQESGSSLEPPSGLALEDGAHV	S	711	1.4804	1.44979	1.60622	1.47155	*	0.000432297	3	0.452487	0.535845	0.683672	0.557335	9356900	Casein kinase II substrate motif;G protein-coupled receptor kinase 1 substrate motif;MDC1 BRCT domain binding motif;Plk1 PBD domain binding motif	cellular process;establishment of localization;transport;vesicle-mediated transport		cell part;cytoplasmic part;Golgi apparatus;intracellular membrane-bounded organelle;intracellular organelle;intracellular part;membrane-bounded organelle;organelle		Completeproteome;ER-Golgitransport;Golgiapparatus;Referenceproteome;Transport	GO:0006810;GO:0009987;GO:0016192;GO:0051234		GO:0005794;GO:0043226;GO:0043227;GO:0043229;GO:0043231;GO:0044424;GO:0044444;GO:0044464
Q8C1Z8	tRNA methyltransferase 10 homolog A	Trmt10a	PASIESPNVEEKLGTSDGEEERQEPRVDAGA	S	22	1.2001	1.29732	1.21569	1.20496	*	0.00139878	3	0.149654	0.375531	0.28178	0.268988	4851700	Casein kinase II substrate motif;PKA kinase substrate motif		catalytic activity;methyltransferase activity;transferase activity;transferase activity, transferring one-carbon groups			Coiledcoil;Completeproteome;Methyltransferase;Referenceproteome;S-adenosyl-L-methionine;Transferase		GO:0003824;GO:0008168;GO:0016740;GO:0016741
Q3V3E1	Ubiquitin-associated and SH3 domain-containing protein A	Ubash3a	_______MAAGETQLYAKVSNKLKGRSTPSL	Y	9	1.504	1.54324	1.33056	1.41857	*	0.0021589	3	0.475304	0.625962	0.412032	0.504433	2004300	Csk SH2 domain binding motif;JAK2 kinase substrate motif;Src kinase substrate motif	biological regulation;cellular macromolecule metabolic process;cellular metabolic process;cellular nitrogen compound metabolic process;cellular process;macromolecule metabolic process;metabolic process;negative regulation of antigen receptor-mediated signaling pathway;negative regulation of biological process;negative regulation of cell communication;negative regulation of cellular process;negati…	catalytic activity	cell part;cytoplasmic part;cytosol;intracellular membrane-bounded organelle;intracellular organelle;intracellular part;membrane-bounded organelle;nucleus;organelle		3D-structure;Completeproteome;Cytoplasm;Nucleus;Referenceproteome;SH3domain	GO:0001817;GO:0002682;GO:0002683;GO:0006139;GO:0006807;GO:0008152;GO:0009966;GO:0009968;GO:0009987;GO:0010646;GO:0010648;GO:0016070;GO:0023051;GO:0023057;GO:0034641;GO:0043170;GO:0044237;GO:0044238;GO:0044260;GO:0048519;GO:0048523;GO:0048583;GO:0048585;GO:0050789;GO:0050794;GO:0050854;GO:0050856;GO:0050858;GO:0050860;GO:0051239;GO:0065007;GO:0090304	GO:0003824	GO:0005634;GO:0005829;GO:0043226;GO:0043227;GO:0043229;GO:0043231;GO:0044424;GO:0044444;GO:0044464
Q9CZY3	Ubiquitin-conjugating enzyme E2 variant 1	Ube2v1	KENMKLPQPPEGQCYSN______________	S	146	2.1303	2.17613	2.69985	2.26169	*	0.00186299	3	0.977556	1.12177	1.43288	1.1774	2353900		cellular macromolecule metabolic process;cellular metabolic process;cellular nitrogen compound metabolic process;cellular process;cellular protein metabolic process;cellular response to stimulus;cellular response to stress;DNA metabolic process;DNA repair;error-free postreplication DNA repair;macromolecule metabolic process;macromolecule modification;metabolic process;nitrogen compound metabolic …	acid-amino acid ligase activity;catalytic activity;ligase activity;ligase activity, forming carbon-nitrogen bonds	cell part;intracellular membrane-bounded organelle;intracellular organelle;intracellular part;macromolecular complex;membrane-bounded organelle;nucleus;organelle;protein complex;UBC13-UEV1A complex;ubiquitin conjugating enzyme complex;ubiquitin ligase complex		Acetylation;Alternativesplicing;Completeproteome;Nucleus;Referenceproteome;Ublconjugationpathway	GO:0000209;GO:0006139;GO:0006259;GO:0006281;GO:0006301;GO:0006464;GO:0006807;GO:0006950;GO:0006974;GO:0008152;GO:0009987;GO:0016567;GO:0019538;GO:0032446;GO:0033554;GO:0034641;GO:0042275;GO:0043170;GO:0043412;GO:0044237;GO:0044238;GO:0044260;GO:0044267;GO:0050896;GO:0051716;GO:0070534;GO:0070647;GO:0090304	GO:0003824;GO:0016874;GO:0016879;GO:0016881	GO:0000151;GO:0005634;GO:0031371;GO:0032991;GO:0035370;GO:0043226;GO:0043227;GO:0043229;GO:0043231;GO:0043234;GO:0044424;GO:0044464
A2AN08	E3 ubiquitin-protein ligase UBR4	Ubr4	TVKTLSDVEDQKELASPVSPELRQKEVQMNF	S	178	1.3972	1.43078	1.50461	1.40614	*	0.00015093	3	0.369038	0.516801	0.589386	0.491742	3404100	Casein kinase I substrate motif;Casein kinase II substrate motif;ERK1,2 kinase substrate motif;G protein-coupled receptor kinase 1 substrate motif;GSK-3, ERK1, ERK2, CDK5 substrate motif;PKA kinase substrate motif;WW domain binding motif		acid-amino acid ligase activity;binding;catalytic activity;cation binding;ion binding;ligase activity;ligase activity, forming carbon-nitrogen bonds;metal ion binding;small conjugating protein ligase activity;transition metal ion binding;ubiquitin-protein ligase activity;zinc ion binding	cell part;cytoplasm;cytoskeleton;integral to membrane;intracellular membrane-bounded organelle;intracellular non-membrane-bounded organelle;intracellular organelle;intracellular part;intrinsic to membrane;membrane part;membrane-bounded organelle;non-membrane-bounded organelle;nucleus;organelle		Acetylation;Alternativesplicing;Calmodulin-binding;Completeproteome;Cytoplasm;Cytoskeleton;Ligase;Membrane;Metal-binding;Nucleus;Phosphoprotein;Referenceproteome;Transmembrane;Transmembranehelix;Ublconjugationpathway;Zinc;Zinc-finger		GO:0003824;GO:0004842;GO:0005488;GO:0008270;GO:0016874;GO:0016879;GO:0016881;GO:0019787;GO:0043167;GO:0043169;GO:0046872;GO:0046914	GO:0005634;GO:0005737;GO:0005856;GO:0016021;GO:0031224;GO:0043226;GO:0043227;GO:0043228;GO:0043229;GO:0043231;GO:0043232;GO:0044424;GO:0044425;GO:0044464
P52479	Ubiquitin carboxyl-terminal hydrolase 10	Usp10	EFMDVLPPVMPRTCDSPQNPVDFISGPVPDS	S	208	1.479	1.41788	1.42339	1.40256	*	< 0.0001	3	0.451122	0.503739	0.509335	0.488065	33805000	b-Adrenergic Receptor kinase substrate motif;ERK1,2 kinase substrate motif;G protein-coupled receptor kinase 1 substrate motif;GSK-3, ERK1, ERK2, CDK5 substrate motif;WW domain binding motif	autophagy;biological regulation;catabolic process;cellular catabolic process;cellular macromolecule catabolic process;cellular macromolecule metabolic process;cellular metabolic process;cellular nitrogen compound metabolic process;cellular process;cellular protein metabolic process;cellular response to stimulus;cellular response to stress;DNA damage response, signal transduction by p53 class medi…	binding;catalytic activity;cysteine-type endopeptidase activity;cysteine-type peptidase activity;endopeptidase activity;hydrolase activity;hydrolase activity, acting on ester bonds;ion channel binding;p53 binding;peptidase activity;peptidase activity, acting on L-amino acid peptides;protein binding;small conjugating protein-specific protease activity;thiolester hydrolase activity;ubiquitin thiole…	cell part;cytoplasmic part;cytoskeleton;early endosome;endosome;intermediate filament cytoskeleton;intracellular membrane-bounded organelle;intracellular non-membrane-bounded organelle;intracellular organelle;intracellular part;membrane-bounded organelle;non-membrane-bounded organelle;nucleus;organelle		Acetylation;Alternativesplicing;Autophagy;Completeproteome;Cytoplasm;DNAdamage;DNArepair;Endosome;Hydrolase;Nucleus;Phosphoprotein;Protease;Referenceproteome;Thiolprotease;Ublconjugation;Ublconjugationpathway	GO:0006139;GO:0006259;GO:0006281;GO:0006464;GO:0006508;GO:0006511;GO:0006807;GO:0006914;GO:0006950;GO:0006974;GO:0007165;GO:0008152;GO:0009056;GO:0009057;GO:0009894;GO:0009987;GO:0010506;GO:0016579;GO:0019222;GO:0019538;GO:0019941;GO:0030330;GO:0031323;GO:0031329;GO:0033554;GO:0034641;GO:0035556;GO:0042770;GO:0043170;GO:0043412;GO:0043632;GO:0044237;GO:0044238;GO:0044248;GO:0044260;GO:0044265;GO:…	GO:0002039;GO:0003824;GO:0004175;GO:0004197;GO:0004221;GO:0004843;GO:0005488;GO:0005515;GO:0008233;GO:0008234;GO:0016787;GO:0016788;GO:0016790;GO:0019783;GO:0044325;GO:0070011	GO:0005634;GO:0005768;GO:0005769;GO:0005856;GO:0043226;GO:0043227;GO:0043228;GO:0043229;GO:0043231;GO:0043232;GO:0044424;GO:0044444;GO:0044464;GO:0045111
P59328	WD repeat and HMG-box DNA-binding protein 1	Wdhd1	SELAAEKAAELAETQSEEEKEEDFREKLNAG	S	821	1.1925	1.18983	1.13976	1.1434	*	0.00053129	3	0.140489	0.250762	0.188731	0.193327	15073000	BARD1 BRCT domain binding motif;Casein kinase I substrate motif;Casein kinase II substrate motif;G protein-coupled receptor kinase 1 substrate motif	biological regulation;cellular component maintece;cellular component maintece at cellular level;cellular component organization;cellular component organization at cellular level;cellular component organization or biogenesis;cellular component organization or biogenesis at cellular level;cellular macromolecule metabolic process;cellular metabolic process;cellular nitrogen compound metabolic proces…	binding;chromatin binding;DNA binding;enzyme binding;nucleic acid binding;protein binding;RNA binding;RNA polymerase binding	cell part;chromosomal part;chromosome, centromeric region;intracellular organelle part;intracellular part;nuclear part;nucleoplasm;organelle part		Acetylation;Alternativesplicing;Completeproteome;DNA-binding;Nucleus;Phosphoprotein;Referenceproteome;Repeat;WDrepeat	GO:0006139;GO:0006325;GO:0006396;GO:0006807;GO:0006996;GO:0008152;GO:0009987;GO:0016043;GO:0016070;GO:0033043;GO:0033044;GO:0034641;GO:0043170;GO:0043954;GO:0044237;GO:0044238;GO:0044260;GO:0050789;GO:0050794;GO:0051128;GO:0051276;GO:0065007;GO:0070827;GO:0070828;GO:0070829;GO:0071840;GO:0071841;GO:0071842;GO:0071956;GO:0090304	GO:0003676;GO:0003677;GO:0003682;GO:0003723;GO:0005488;GO:0005515;GO:0019899;GO:0070063	GO:0000775;GO:0005654;GO:0044422;GO:0044424;GO:0044427;GO:0044428;GO:0044446;GO:0044464
P97789	5'-3' exoribonuclease 1	Xrn1	GGSARCSIKLLKRNESPGTSEAQKVVTSYPN	S	1328	1.1627	1.17604	1.25498	1.16624	*	0.00234779	3	0.103978	0.233935	0.327665	0.22186	6134100	14-3-3 domain binding motif;b-Adrenergic Receptor kinase substrate motif;Calmodulin-dependent protein kinase II substrate motif;Calmodulin-dependent protein kinase IV substrate motif;Casein kinase II substrate motif;Chk1 kinase substrate motif;ERK1,2 kinase substrate motif;G protein-coupled receptor kinase 1 substrate motif;GSK3 kinase substrate motif;GSK-3, ERK1, ERK2, CDK5 substrate motif;PKA k…	aging;anatomical structure homeostasis;biological regulation;catabolic process;cell aging;cell cycle phase;cell cycle process;cellular catabolic process;cellular component organization;cellular component organization at cellular level;cellular component organization or biogenesis;cellular component organization or biogenesis at cellular level;cellular macromolecule catabolic process;cellular macr…	5'-3' exonuclease activity;5'-3' exoribonuclease activity;binding;catalytic activity;DNA binding;exonuclease activity;exonuclease activity, active with either ribo- or deoxyribonucleic acids and producing 5'-phosphomonoesters;exoribonuclease activity;exoribonuclease activity, producing 5'-phosphomonoesters;hydrolase activity;hydrolase activity, acting on ester bonds;nuclease activity;nucleic acid…	cell part;cytoplasmic mRNA processing body;cytoplasmic part;intracellular non-membrane-bounded organelle;intracellular organelle;intracellular part;macromolecular complex;non-membrane-bounded organelle;organelle;ribonucleoprotein complex;RNA granule	Ribosome biogenesis in eukaryotes;RNA degradation	Alternativesplicing;Completeproteome;Cytoplasm;DNA-binding;Exonuclease;Hydrolase;Nuclease;Referenceproteome;RNA-binding	GO:0000723;GO:0000956;GO:0006139;GO:0006259;GO:0006396;GO:0006401;GO:0006402;GO:0006807;GO:0006996;GO:0007126;GO:0007568;GO:0007569;GO:0008152;GO:0008334;GO:0009056;GO:0009057;GO:0009987;GO:0016043;GO:0016070;GO:0016071;GO:0022402;GO:0022403;GO:0032200;GO:0032502;GO:0034641;GO:0042592;GO:0043170;GO:0044237;GO:0044238;GO:0044248;GO:0044260;GO:0044265;GO:0051276;GO:0060249;GO:0065007;GO:0065008;GO:…	GO:0003676;GO:0003677;GO:0003723;GO:0003824;GO:0004518;GO:0004527;GO:0004532;GO:0004534;GO:0004540;GO:0005488;GO:0008409;GO:0016787;GO:0016788;GO:0016796;GO:0016896	GO:0000932;GO:0030529;GO:0032991;GO:0035770;GO:0043226;GO:0043228;GO:0043229;GO:0043232;GO:0044424;GO:0044444;GO:0044464
Q5BLK4	Terminal uridylyltransferase 7	Zcchc6	EEEEEEEEPRLSINLTEDEEGVANEHQVDSR	T	865	1.7477	1.55182	1.73977	1.63384	*	0.000445178	3	0.691957	0.633962	0.798893	0.708271	1589400	Casein kinase II substrate motif;G protein-coupled receptor kinase 1 substrate motif;MAPKAPK2 kinase substrate motif	cellular macromolecule metabolic process;cellular metabolic process;cellular nitrogen compound metabolic process;cellular process;macromolecule metabolic process;metabolic process;nitrogen compound metabolic process;nucleic acid metabolic process;nucleobase-containing compound metabolic process;primary metabolic process;RNA 3'-end processing;RNA metabolic process;RNA processing	binding;catalytic activity;cation binding;ion binding;metal ion binding;nucleic acid binding;nucleotidyltransferase activity;RNA uridylyltransferase activity;transferase activity;transferase activity, transferring phosphorus-containing groups;transition metal ion binding;uridylyltransferase activity;zinc ion binding			Completeproteome;Magnesium;Manganese;Metal-binding;Nucleotidyltransferase;Phosphoprotein;Referenceproteome;Repeat;Transferase;Zinc;Zinc-finger	GO:0006139;GO:0006396;GO:0006807;GO:0008152;GO:0009987;GO:0016070;GO:0031123;GO:0034641;GO:0043170;GO:0044237;GO:0044238;GO:0044260;GO:0090304	GO:0003676;GO:0003824;GO:0005488;GO:0008270;GO:0016740;GO:0016772;GO:0016779;GO:0043167;GO:0043169;GO:0046872;GO:0046914;GO:0050265;GO:0070569
P23949	Zinc finger protein 36, C3H1 type-like 2	Zfp36l2	SGTALVTKESKFRDRSFSENGERSQHLLHLQ	S	125	1.2009	1.31007	1.21514	1.20898	*	0.00211876	3	0.150616	0.389644	0.281118	0.273792	3063300	14-3-3 domain binding motif;Calmodulin-dependent protein kinase II substrate motif;Casein kinase II substrate motif;MAPKAPK1 kinase substrate motif;PKA kinase substrate motif;PKC kinase substrate motif	biological regulation;catabolic process;cell activation;cell differentiation;cellular catabolic process;cellular developmental process;cellular macromolecule catabolic process;cellular macromolecule metabolic process;cellular metabolic process;cellular nitrogen compound metabolic process;cellular process;developmental process;immune system process;leukocyte activation;leukocyte differentiation;ly…	binding;cation binding;DNA binding;ion binding;metal ion binding;nucleic acid binding;RNA binding;transition metal ion binding;zinc ion binding	cell part;cytoplasm;intracellular membrane-bounded organelle;intracellular organelle;intracellular part;membrane-bounded organelle;nucleus;organelle		Completeproteome;DNA-binding;Metal-binding;Nucleus;Phosphoprotein;Referenceproteome;Repeat;RNA-binding;Zinc;Zinc-finger	GO:0000288;GO:0000956;GO:0001775;GO:0002376;GO:0002521;GO:0006139;GO:0006401;GO:0006402;GO:0006807;GO:0008152;GO:0009056;GO:0009057;GO:0009987;GO:0010468;GO:0010608;GO:0016070;GO:0016071;GO:0019219;GO:0019222;GO:0030098;GO:0030154;GO:0030217;GO:0031323;GO:0032502;GO:0033077;GO:0034641;GO:0042110;GO:0043170;GO:0043487;GO:0043488;GO:0044237;GO:0044238;GO:0044248;GO:0044260;GO:0044265;GO:0045321;GO:…	GO:0003676;GO:0003677;GO:0003723;GO:0005488;GO:0008270;GO:0043167;GO:0043169;GO:0046872;GO:0046914	GO:0005634;GO:0005737;GO:0043226;GO:0043227;GO:0043229;GO:0043231;GO:0044424;GO:0044464
Q9DAU9	Zinc finger protein 654	Znf654	AHLAQKKCQTLFGFDSDDESA__________	S	566	1.1494	1.22117	1.15296	1.14366	*	0.00171422	3	0.0873805	0.288269	0.20534	0.193663	782400	b-Adrenergic Receptor kinase substrate motif;BARD1 BRCT domain binding motif;Casein kinase II substrate motif;G protein-coupled receptor kinase 1 substrate motif;GSK3 kinase substrate motif	biological regulation;biosynthetic process;cellular biosynthetic process;cellular macromolecule biosynthetic process;cellular macromolecule metabolic process;cellular metabolic process;cellular nitrogen compound metabolic process;cellular process;macromolecule biosynthetic process;macromolecule metabolic process;metabolic process;nitrogen compound metabolic process;nucleic acid metabolic process;…	binding;cation binding;DNA binding;ion binding;metal ion binding;nucleic acid binding;transition metal ion binding;zinc ion binding	cell part;intracellular membrane-bounded organelle;intracellular organelle;intracellular part;membrane-bounded organelle;nucleus;organelle		Completeproteome;DNA-binding;Metal-binding;Nucleus;Phosphoprotein;Referenceproteome;Repeat;Transcription;Transcriptionregulation;Zinc;Zinc-finger	GO:0006139;GO:0006351;GO:0006355;GO:0006807;GO:0008152;GO:0009058;GO:0009059;GO:0009889;GO:0009987;GO:0010468;GO:0010556;GO:0016070;GO:0019219;GO:0019222;GO:0031323;GO:0031326;GO:0032774;GO:0034641;GO:0034645;GO:0043170;GO:0044237;GO:0044238;GO:0044249;GO:0044260;GO:0050789;GO:0050794;GO:0051171;GO:0051252;GO:0060255;GO:0065007;GO:0080090;GO:0090304;GO:2000112	GO:0003676;GO:0003677;GO:0005488;GO:0008270;GO:0043167;GO:0043169;GO:0046872;GO:0046914	GO:0005634;GO:0043226;GO:0043227;GO:0043229;GO:0043231;GO:0044424;GO:0044464
Q8K207	Uncharacterized protein C1orf21 homolog		PGLVHQPRANMHISESQQEFFRMLDEKIEKG	S	95	1.5873	1.65859	1.71997	1.61158	*	< 0.0001	3	0.553074	0.729958	0.782384	0.688472	8688000	AMP-activated protein kinase substrate motif;ATM kinase substrate motif;b-Adrenergic Receptor kinase substrate motif;Casein kinase II substrate motif;DNA dependent Protein kinase substrate motif					Completeproteome;Phosphoprotein;Referenceproteome
Q80WR5	UPF0688 protein C1orf174 homolog		ASVLQMDSSIFLDDDSNQPMPVSRFFGNVEL	S	180	1.9148	2.11066	2.1811	2.01226	*	0.000178502	3	0.823693	1.07769	1.12506	1.00881	5962900	b-Adrenergic Receptor kinase substrate motif;Casein kinase I substrate motif			cell part;intracellular membrane-bounded organelle;intracellular organelle;intracellular part;membrane-bounded organelle;nucleus;organelle		Completeproteome;Nucleus;Phosphoprotein;Referenceproteome			GO:0005634;GO:0043226;GO:0043227;GO:0043229;GO:0043231;GO:0044424;GO:0044464

## Sheet: Downregulated by IL-23
Protein	Protein names	Gene names	Sequence window	Amino acid	Position	ratio_IL-23/Ctrl_Exp.1_linear	ratio_IL-23/Ctrl_Exp.2_linear	ratio_IL-23/Ctrl_Exp.3_linear	ratio_IL-23/Ctrl_AVG_linear	Discovery_FDR-5%	Adjusted P value	N exp.	ratio_IL-23/Ctrl_Exp.1_log2	ratio_IL-23/Ctrl_Exp.2_log2	ratio_IL-23/Ctrl_Exp.3_log2	ratio_IL-23/Ctrl_AVG_log2	MS Intensity	Motifs	GOBP name	GOMF name	GOCC name	KEGG name	Keywords	GOBP	GOMF	GOCC
Q6P542	ATP-binding cassette sub-family F member 1	Abcf1	EKSKGKAKSKPAAADSEGEEEEEDTAKEKEP	S	194	0.52752	0.433515	0.517778	0.478343	*	< 0.0001	3	-1.0362	-1.20585	-0.949595	-1.06388	19242000	b-Adrenergic Receptor kinase substrate motif;Casein kinase II substrate motif;G protein-coupled receptor kinase 1 substrate motif	ATP catabolic process;ATP metabolic process;catabolic process;cellular catabolic process;cellular metabolic process;cellular nitrogen compound catabolic process;cellular nitrogen compound metabolic process;cellular process;heterocycle catabolic process;heterocycle metabolic process;metabolic process;nitrogen compound metabolic process;nucleobase-containing compound catabolic process;nucleobase-co…	adenyl nucleotide binding;adenyl ribonucleotide binding;ATP binding;ATPase activity;binding;catalytic activity;hydrolase activity;hydrolase activity, acting on acid anhydrides;hydrolase activity, acting on acid anhydrides, in phosphorus-containing anhydrides;nucleic acid binding;nucleoside-triphosphatase activity;nucleotide binding;purine nucleotide binding;purine ribonucleoside triphosphate bind…	cell part;cytoplasmic part;envelope;intracellular non-membrane-bounded organelle;intracellular organelle;intracellular organelle part;intracellular part;macromolecular complex;non-membrane-bounded organelle;nuclear envelope;nuclear part;nucleoplasm;organelle;organelle envelope;organelle part;polysomal ribosome;ribonucleoprotein complex;ribosome		Activator;ATP-binding;Completeproteome;Cytoplasm;Isopeptidebond;Nucleotide-binding;Nucleus;Phosphoprotein;Referenceproteome;Repeat;Ublconjugation	GO:0006139;GO:0006163;GO:0006195;GO:0006200;GO:0006413;GO:0006753;GO:0006807;GO:0008152;GO:0009056;GO:0009117;GO:0009141;GO:0009143;GO:0009144;GO:0009146;GO:0009150;GO:0009154;GO:0009166;GO:0009199;GO:0009203;GO:0009205;GO:0009207;GO:0009259;GO:0009261;GO:0009987;GO:0034641;GO:0034655;GO:0044237;GO:0044238;GO:0044248;GO:0044270;GO:0044281;GO:0046034;GO:0046483;GO:0046700;GO:0055086;GO:0072521;GO:…	GO:0000166;GO:0003676;GO:0003824;GO:0005488;GO:0005524;GO:0008494;GO:0016462;GO:0016787;GO:0016817;GO:0016818;GO:0016887;GO:0017076;GO:0017111;GO:0030554;GO:0032553;GO:0032555;GO:0032559;GO:0035639;GO:0043021;GO:0043022;GO:0045182;GO:0090079	GO:0005635;GO:0005654;GO:0005840;GO:0030529;GO:0031967;GO:0031975;GO:0032991;GO:0042788;GO:0043226;GO:0043228;GO:0043229;GO:0043232;GO:0044422;GO:0044424;GO:0044428;GO:0044444;GO:0044446;GO:0044464
Q91YE5	Bromodomain adjacent to zinc finger domain protein 2A	Baz2a	TDNRLPKKLETQEILSEDDKAKMTKNKKKMR	S	695	0.80103	0.781529	0.791564	0.770852	*	< 0.0001	3	-0.433572	-0.35563	-0.337222	-0.375475	2297800	Casein kinase I substrate motif;Casein kinase II substrate motif;G protein-coupled receptor kinase 1 substrate motif;Pyruvate dehydrogenase kinase substrate motif	biological regulation;biosynthetic process;cellular biosynthetic process;cellular component assembly;cellular component assembly at cellular level;cellular component organization;cellular component organization at cellular level;cellular component organization or biogenesis;cellular component organization or biogenesis at cellular level;cellular macromolecule biosynthetic process;cellular macromo…	binding;cation binding;DNA binding;histone acetyl-lysine binding;histone binding;ion binding;metal ion binding;nucleic acid binding;protein binding;RNA binding;transition metal ion binding;zinc ion binding	cell part;chromatin;chromatin remodeling complex;chromatin silencing complex;chromosomal part;heterochromatin;intracellular non-membrane-bounded organelle;intracellular organelle;intracellular organelle part;intracellular part;macromolecular complex;non-membrane-bounded organelle;nuclear part;nucleolus;organelle;organelle part;protein complex;rDNA heterochromatin		Acetylation;Alternativesplicing;Bromodomain;Chromatinregulator;Coiledcoil;Completeproteome;DNA-binding;Metal-binding;Nucleus;Phosphoprotein;Referenceproteome;Repeat;Repressor;RNA-binding;Transcription;Transcriptionregulation;Zinc;Zinc-finger	GO:0000183;GO:0006139;GO:0006259;GO:0006304;GO:0006305;GO:0006306;GO:0006325;GO:0006333;GO:0006338;GO:0006342;GO:0006351;GO:0006355;GO:0006464;GO:0006476;GO:0006479;GO:0006730;GO:0006807;GO:0006996;GO:0008152;GO:0008213;GO:0009058;GO:0009059;GO:0009889;GO:0009890;GO:0009892;GO:0009987;GO:0010468;GO:0010556;GO:0010558;GO:0010605;GO:0010629;GO:0016043;GO:0016070;GO:0016458;GO:0016568;GO:0016569;GO:…	GO:0003676;GO:0003677;GO:0003723;GO:0005488;GO:0005515;GO:0008270;GO:0042393;GO:0043167;GO:0043169;GO:0046872;GO:0046914;GO:0070577	GO:0000785;GO:0000792;GO:0005677;GO:0005730;GO:0016585;GO:0032991;GO:0033553;GO:0043226;GO:0043228;GO:0043229;GO:0043232;GO:0043234;GO:0044422;GO:0044424;GO:0044427;GO:0044428;GO:0044446;GO:0044464
Q91YE5	Bromodomain adjacent to zinc finger domain protein 2A	Baz2a	DGLGRRRSSRIMEETSGIEEEEEEENTTAVH	S	1042	0.8324	0.890859	0.863589	0.839641	*	0.00123086	3	-0.378152	-0.166731	-0.211583	-0.252155	44191000	Casein kinase I substrate motif;Casein kinase II substrate motif	biological regulation;biosynthetic process;cellular biosynthetic process;cellular component assembly;cellular component assembly at cellular level;cellular component organization;cellular component organization at cellular level;cellular component organization or biogenesis;cellular component organization or biogenesis at cellular level;cellular macromolecule biosynthetic process;cellular macromo…	binding;cation binding;DNA binding;histone acetyl-lysine binding;histone binding;ion binding;metal ion binding;nucleic acid binding;protein binding;RNA binding;transition metal ion binding;zinc ion binding	cell part;chromatin;chromatin remodeling complex;chromatin silencing complex;chromosomal part;heterochromatin;intracellular non-membrane-bounded organelle;intracellular organelle;intracellular organelle part;intracellular part;macromolecular complex;non-membrane-bounded organelle;nuclear part;nucleolus;organelle;organelle part;protein complex;rDNA heterochromatin		Acetylation;Alternativesplicing;Bromodomain;Chromatinregulator;Coiledcoil;Completeproteome;DNA-binding;Metal-binding;Nucleus;Phosphoprotein;Referenceproteome;Repeat;Repressor;RNA-binding;Transcription;Transcriptionregulation;Zinc;Zinc-finger	GO:0000183;GO:0006139;GO:0006259;GO:0006304;GO:0006305;GO:0006306;GO:0006325;GO:0006333;GO:0006338;GO:0006342;GO:0006351;GO:0006355;GO:0006464;GO:0006476;GO:0006479;GO:0006730;GO:0006807;GO:0006996;GO:0008152;GO:0008213;GO:0009058;GO:0009059;GO:0009889;GO:0009890;GO:0009892;GO:0009987;GO:0010468;GO:0010556;GO:0010558;GO:0010605;GO:0010629;GO:0016043;GO:0016070;GO:0016458;GO:0016568;GO:0016569;GO:…	GO:0003676;GO:0003677;GO:0003723;GO:0005488;GO:0005515;GO:0008270;GO:0042393;GO:0043167;GO:0043169;GO:0046872;GO:0046914;GO:0070577	GO:0000785;GO:0000792;GO:0005677;GO:0005730;GO:0016585;GO:0032991;GO:0033553;GO:0043226;GO:0043228;GO:0043229;GO:0043232;GO:0043234;GO:0044422;GO:0044424;GO:0044427;GO:0044428;GO:0044446;GO:0044464
Q8VEB3	UNC119-binding protein C5orf30 homolog	D1Ertd622e	SRSTLTTLPLPVAEGSSPGKAEAEKPRCSST	S	24	0.74086	0.807984	0.738928	0.742207	*	0.000472615	3	-0.546228	-0.307601	-0.436493	-0.430107	5131200		anatomical structure morphogenesis;cell part morphogenesis;cell projection morphogenesis;cell projection organization;cellular component morphogenesis;cellular component organization;cellular component organization at cellular level;cellular component organization or biogenesis;cellular component organization or biogenesis at cellular level;cellular developmental process;cellular process;cilium m…		cell part;cell projection part;ciliary transition zone;cilium part;cytoplasm;intracellular organelle part;intracellular part;organelle part		Cellprojection;Cilium;Ciliumbiogenesis/degradation;Completeproteome;Cytoplasm;Phosphoprotein;Proteintransport;Referenceproteome;Transport	GO:0006810;GO:0009653;GO:0009987;GO:0015031;GO:0016043;GO:0030030;GO:0032502;GO:0032989;GO:0032990;GO:0045184;GO:0048858;GO:0048869;GO:0051234;GO:0060271;GO:0071840;GO:0071841;GO:0071842		GO:0005737;GO:0035869;GO:0044422;GO:0044424;GO:0044441;GO:0044446;GO:0044463;GO:0044464
Q9JIK5	Nucleolar RNA helicase 2	Ddx21	KMKKGKEANGDAGEKSPKLKNGLSQPSEEEA	S	144	0.61367	0.511616	0.496977	0.524424	*	0.00023467	3	-0.817966	-0.966867	-1.00875	-0.931194	8522900	ERK1,2 kinase substrate motif;Growth associated histone HI kinase substrate motif;GSK-3, ERK1, ERK2, CDK5 substrate motif;PKA kinase substrate motif;PKC kinase substrate motif;WW domain binding motif	multi-organism process;response to biotic stimulus;response to chemical stimulus;response to dsRNA;response to exogenous dsRNA;response to organic substance;response to other organism;response to stimulus;response to virus	adenyl nucleotide binding;adenyl ribonucleotide binding;ATP binding;ATPase activity;ATPase activity, coupled;ATP-dependent helicase activity;binding;catalytic activity;double-stranded RNA binding;helicase activity;hydrolase activity;hydrolase activity, acting on acid anhydrides;hydrolase activity, acting on acid anhydrides, in phosphorus-containing anhydrides;nucleic acid binding;nucleoside-triph…	cell part;intracellular non-membrane-bounded organelle;intracellular organelle;intracellular organelle part;intracellular part;non-membrane-bounded organelle;nuclear part;nucleolus;organelle;organelle part		Acetylation;ATP-binding;Completeproteome;Helicase;Hydrolase;Nucleotide-binding;Nucleus;Phosphoprotein;Referenceproteome;Repeat;RNA-binding	GO:0009607;GO:0009615;GO:0010033;GO:0042221;GO:0043330;GO:0043331;GO:0050896;GO:0051704;GO:0051707	GO:0000166;GO:0003676;GO:0003723;GO:0003724;GO:0003725;GO:0003824;GO:0004386;GO:0005488;GO:0005524;GO:0008026;GO:0016462;GO:0016787;GO:0016817;GO:0016818;GO:0016887;GO:0017076;GO:0017111;GO:0030554;GO:0032553;GO:0032555;GO:0032559;GO:0035639;GO:0042623;GO:0070035	GO:0005730;GO:0043226;GO:0043228;GO:0043229;GO:0043232;GO:0044422;GO:0044424;GO:0044428;GO:0044446;GO:0044464
P13864	DNA (cytosine-5)-methyltransferase 1	Dnmt1	ADDDEEADDDVSEMPSPKKLHQGKKKKQNKD	S	717	0.71127	0.668073	0.781463	0.700164	*	0.00106667	3	-0.605031	-0.581922	-0.35575	-0.514234	22174000	Casein kinase I substrate motif;Cdc2 kinase substrate motif;CDK kinase substrate motif;CDK1,2,4,6 kinase substrate motif;DNA dependent Protein kinase substrate motif;ERK1,2 kinase substrate motif;Growth associated histone HI kinase substrate motif;GSK-3, ERK1, ERK2, CDK5 substrate motif;MAPKAPK2 kinase substrate motif;PKA kinase substrate motif;PKC kinase substrate motif;WW domain binding motif	biological regulation;biosynthetic process;cellular biosynthetic process;cellular component organization;cellular component organization at cellular level;cellular component organization or biogenesis;cellular component organization or biogenesis at cellular level;cellular macromolecule biosynthetic process;cellular macromolecule metabolic process;cellular metabolic process;cellular nitrogen comp…	binding;catalytic activity;cation binding;DNA (cytosine-5-)-methyltransferase activity;DNA binding;DNA-methyltransferase activity;ion binding;metal ion binding;methyl-CpG binding;methyltransferase activity;nucleic acid binding;nucleotide binding;RNA binding;S-adenosylmethionine-dependent methyltransferase activity;sequence-specific DNA binding;transferase activity;transferase activity, transferri…	cell part;centromeric heterochromatin;chromatin;chromosomal part;cytoplasm;heterochromatin;intracellular membrane-bounded organelle;intracellular organelle;intracellular organelle part;intracellular part;membrane-bounded organelle;nucleus;organelle;organelle part;replication fork	Cysteine and methionine metabolism	3D-structure;Acetylation;Activator;Allostericenzyme;Alternativesplicing;Chromatinregulator;Completeproteome;Cytoplasm;Directproteinsequencing;DNA-binding;Metal-binding;Methylation;Methyltransferase;Nucleus;Phosphoprotein;Referenceproteome;Repeat;Repressor;S-adenosyl-L-methionine;Transcription;Transcriptionregulation;Transferase;Ublconjugation;Zinc;Zinc-finger	GO:0000122;GO:0001101;GO:0006139;GO:0006259;GO:0006325;GO:0006351;GO:0006355;GO:0006357;GO:0006807;GO:0006996;GO:0008152;GO:0009058;GO:0009059;GO:0009719;GO:0009889;GO:0009890;GO:0009892;GO:0009893;GO:0009987;GO:0010033;GO:0010216;GO:0010243;GO:0010468;GO:0010556;GO:0010558;GO:0010604;GO:0010605;GO:0010628;GO:0010629;GO:0010638;GO:0010639;GO:0014075;GO:0016043;GO:0016070;GO:0016458;GO:0016568;GO:…	GO:0000166;GO:0003676;GO:0003677;GO:0003723;GO:0003824;GO:0003886;GO:0005488;GO:0008168;GO:0008270;GO:0008327;GO:0008757;GO:0009008;GO:0016740;GO:0016741;GO:0043167;GO:0043169;GO:0043565;GO:0046872;GO:0046914	GO:0000785;GO:0000792;GO:0005634;GO:0005657;GO:0005721;GO:0005737;GO:0043226;GO:0043227;GO:0043229;GO:0043231;GO:0044422;GO:0044424;GO:0044427;GO:0044446;GO:0044464
Q66JX5	FGFR1 oncogene partner	Fgfr1op	VEGALDLSDGHPPSKSPEGKSSANSTPSKIP	S	160	0.69851	0.716338	0.631729	0.663567	*	0.00024769	3	-0.631148	-0.481288	-0.662623	-0.591686	4429400	Casein kinase II substrate motif;ERK1,2 kinase substrate motif;Growth associated histone HI kinase substrate motif;GSK-3, ERK1, ERK2, CDK5 substrate motif;WW domain binding motif	biological regulation;cellular component organization;cellular component organization at cellular level;cellular component organization or biogenesis;cellular component organization or biogenesis at cellular level;cellular process;cytoskeleton organization;maintece of location;maintece of location in cell;maintece of protein location;maintece of protein location in cell;microtubule anchoring;micr…	enzyme inhibitor activity;enzyme regulator activity;kinase inhibitor activity;kinase regulator activity;protein kinase inhibitor activity;protein kinase regulator activity;protein tyrosine kinase inhibitor activity	cell part;centrosome;cytoplasmic part;cytoskeletal part;intracellular membrane-bounded organelle;intracellular non-membrane-bounded organelle;intracellular organelle;intracellular organelle part;intracellular part;membrane-bounded organelle;microtubule organizing center;non-membrane-bounded organelle;nucleus;organelle;organelle part;perinuclear region of cytoplasm		Alternativesplicing;Completeproteome;Cytoplasm;Cytoskeleton;Phosphoprotein;Polymorphism;Referenceproteome	GO:0000226;GO:0001558;GO:0006996;GO:0007010;GO:0007017;GO:0008284;GO:0009987;GO:0016043;GO:0030307;GO:0030334;GO:0030335;GO:0032507;GO:0032879;GO:0034453;GO:0040008;GO:0040012;GO:0040017;GO:0042127;GO:0045185;GO:0045927;GO:0048518;GO:0048522;GO:0050789;GO:0050794;GO:0051128;GO:0051235;GO:0051270;GO:0051272;GO:0051651;GO:0065007;GO:0065008;GO:0071840;GO:0071841;GO:0071842;GO:2000145;GO:2000147	GO:0004857;GO:0004860;GO:0019207;GO:0019210;GO:0019887;GO:0030234;GO:0030292	GO:0005634;GO:0005813;GO:0005815;GO:0043226;GO:0043227;GO:0043228;GO:0043229;GO:0043231;GO:0043232;GO:0044422;GO:0044424;GO:0044430;GO:0044444;GO:0044446;GO:0044464;GO:0048471
P55937	Golgin subfamily A member 3	Golga3	QDASVEVNRGFKEEGSPDRSSQVAICQNGQI	S	60	0.81908	0.87161	0.8442	0.822828	*	0.000516429	3	-0.401424	-0.198245	-0.244344	-0.281338	3230300	Casein kinase I substrate motif;Cdc2 kinase substrate motif;CDK kinase substrate motif;CDK1,2,4,6 kinase substrate motif;ERK1,2 kinase substrate motif;G protein-coupled receptor kinase 1 substrate motif;GSK3 kinase substrate motif;GSK-3, ERK1, ERK2, CDK5 substrate motif;PKA kinase substrate motif;WW domain binding motif	cell differentiation;cellular developmental process;cellular process;developmental process;gamete generation;male gamete generation;multicellular organismal development;multicellular organismal process;multicellular organismal reproductive process;reproductive process;spermatogenesis		cell part;cytoplasmic part;endoplasmic reticulum-Golgi intermediate compartment;Golgi apparatus part;Golgi cisterna membrane;Golgi membrane;Golgi transport complex;intracellular membrane-bounded organelle;intracellular organelle;intracellular organelle part;intracellular part;macromolecular complex;membrane;membrane-bounded organelle;nucleus;organelle;organelle membrane;organelle part;protein com…		Acetylation;Alternativesplicing;Coiledcoil;Completeproteome;Cytoplasm;Developmentalprotein;Differentiation;Golgiapparatus;Membrane;Phosphoprotein;Referenceproteome;Spermatogenesis	GO:0007275;GO:0007276;GO:0007283;GO:0009987;GO:0022414;GO:0030154;GO:0032501;GO:0032502;GO:0048232;GO:0048609;GO:0048869		GO:0000139;GO:0005634;GO:0005793;GO:0016020;GO:0017119;GO:0031090;GO:0032580;GO:0032991;GO:0043226;GO:0043227;GO:0043229;GO:0043231;GO:0043234;GO:0044422;GO:0044424;GO:0044431;GO:0044444;GO:0044446;GO:0044464
Q8BUV3	Gephyrin;Molybdopterin adenylyltransferase;Molybdopterin molybdenumtransferase	Gphn	IVKVKEVHDELEDLPSPPPPLSPPPTTSPHK	S	188	0.7059	0.57107	0.525087	0.58054	*	0.00181567	3	-0.615965	-0.808262	-0.929372	-0.784533	5937000	Casein kinase I substrate motif;DNA dependent Protein kinase substrate motif;ERK1,2 kinase substrate motif;G protein-coupled receptor kinase 1 substrate motif;GSK-3, ERK1, ERK2, CDK5 substrate motif;WW domain binding motif	aromatic compound biosynthetic process;biosynthetic process;cellular aromatic compound metabolic process;cellular biosynthetic process;cellular component organization;cellular component organization or biogenesis;cellular metabolic process;cellular nitrogen compound biosynthetic process;cellular nitrogen compound metabolic process;cellular process;coenzyme biosynthetic process;coenzyme metabolic …	adenyl nucleotide binding;adenyl ribonucleotide binding;ATP binding;binding;catalytic activity;cation binding;cytoskeletal protein binding;ion binding;metal ion binding;nucleotide binding;protein binding;purine nucleotide binding;purine ribonucleoside triphosphate binding;purine ribonucleotide binding;ribonucleotide binding;transferase activity	cell junction;cell part;cytoplasm;cytoskeleton;extrinsic to membrane;extrinsic to plasma membrane;intracellular;intracellular non-membrane-bounded organelle;intracellular organelle;intracellular part;membrane;membrane part;non-membrane-bounded organelle;organelle;plasma membrane part;postsynaptic membrane;synapse part;synaptic membrane		ATP-binding;Celljunction;Cellmembrane;Completeproteome;Cytoplasm;Cytoskeleton;Magnesium;Membrane;Metal-binding;Molybdenum;Molybdenumcofactorbiosynthesis;Multifunctionalenzyme;Nucleotide-binding;Phosphoprotein;Postsynapticcellmembrane;Referenceproteome;Synapse;Transferase	GO:0006725;GO:0006732;GO:0006777;GO:0006807;GO:0007529;GO:0008152;GO:0009058;GO:0009108;GO:0009987;GO:0016043;GO:0018130;GO:0019438;GO:0019720;GO:0032324;GO:0034641;GO:0042558;GO:0042559;GO:0043545;GO:0044237;GO:0044249;GO:0044271;GO:0046483;GO:0050808;GO:0051186;GO:0051188;GO:0051189;GO:0071840	GO:0000166;GO:0003824;GO:0005488;GO:0005515;GO:0005524;GO:0008092;GO:0016740;GO:0017076;GO:0030554;GO:0032553;GO:0032555;GO:0032559;GO:0035639;GO:0043167;GO:0043169;GO:0046872	GO:0005622;GO:0005737;GO:0005856;GO:0016020;GO:0019897;GO:0019898;GO:0030054;GO:0043226;GO:0043228;GO:0043229;GO:0043232;GO:0044424;GO:0044425;GO:0044456;GO:0044459;GO:0044464;GO:0045211;GO:0097060
Q8BUV3	Gephyrin;Molybdopterin adenylyltransferase;Molybdopterin molybdenumtransferase	Gphn	VHDELEDLPSPPPPLSPPPTTSPHKQTEDKG	S	194	0.7059	0.57107	0.525087	0.58054	*	0.00181567	3	-0.615965	-0.808262	-0.929372	-0.784533	5937000	ERK1,2 kinase substrate motif;G protein-coupled receptor kinase 1 substrate motif;GSK-3, ERK1, ERK2, CDK5 substrate motif;WW domain binding motif	aromatic compound biosynthetic process;biosynthetic process;cellular aromatic compound metabolic process;cellular biosynthetic process;cellular component organization;cellular component organization or biogenesis;cellular metabolic process;cellular nitrogen compound biosynthetic process;cellular nitrogen compound metabolic process;cellular process;coenzyme biosynthetic process;coenzyme metabolic …	adenyl nucleotide binding;adenyl ribonucleotide binding;ATP binding;binding;catalytic activity;cation binding;cytoskeletal protein binding;ion binding;metal ion binding;nucleotide binding;protein binding;purine nucleotide binding;purine ribonucleoside triphosphate binding;purine ribonucleotide binding;ribonucleotide binding;transferase activity	cell junction;cell part;cytoplasm;cytoskeleton;extrinsic to membrane;extrinsic to plasma membrane;intracellular;intracellular non-membrane-bounded organelle;intracellular organelle;intracellular part;membrane;membrane part;non-membrane-bounded organelle;organelle;plasma membrane part;postsynaptic membrane;synapse part;synaptic membrane		ATP-binding;Celljunction;Cellmembrane;Completeproteome;Cytoplasm;Cytoskeleton;Magnesium;Membrane;Metal-binding;Molybdenum;Molybdenumcofactorbiosynthesis;Multifunctionalenzyme;Nucleotide-binding;Phosphoprotein;Postsynapticcellmembrane;Referenceproteome;Synapse;Transferase	GO:0006725;GO:0006732;GO:0006777;GO:0006807;GO:0007529;GO:0008152;GO:0009058;GO:0009108;GO:0009987;GO:0016043;GO:0018130;GO:0019438;GO:0019720;GO:0032324;GO:0034641;GO:0042558;GO:0042559;GO:0043545;GO:0044237;GO:0044249;GO:0044271;GO:0046483;GO:0050808;GO:0051186;GO:0051188;GO:0051189;GO:0071840	GO:0000166;GO:0003824;GO:0005488;GO:0005515;GO:0005524;GO:0008092;GO:0016740;GO:0017076;GO:0030554;GO:0032553;GO:0032555;GO:0032559;GO:0035639;GO:0043167;GO:0043169;GO:0046872	GO:0005622;GO:0005737;GO:0005856;GO:0016020;GO:0019897;GO:0019898;GO:0030054;GO:0043226;GO:0043228;GO:0043229;GO:0043232;GO:0044424;GO:0044425;GO:0044456;GO:0044459;GO:0044464;GO:0045211;GO:0097060
Q8R0A0	General transcription factor IIF subunit 2	Gtf2f2	WELKPEYRHYQTEEKSD______________	S	248	0.86043	0.847525	0.807756	0.816571	*	0.000523659	3	-0.330371	-0.238672	-0.308009	-0.292351	9872700	Casein kinase I substrate motif	biological regulation;biosynthetic process;cellular biosynthetic process;cellular macromolecule metabolic process;cellular metabolic process;cellular nitrogen compound metabolic process;cellular process;macromolecule metabolic process;metabolic process;nitrogen compound metabolic process;nucleic acid metabolic process;nucleobase-containing compound metabolic process;primary metabolic process;regu…	adenyl nucleotide binding;adenyl ribonucleotide binding;ATP binding;ATPase activity;ATPase activity, coupled;ATP-dependent helicase activity;binding;catalytic activity;DNA binding;helicase activity;hydrolase activity;hydrolase activity, acting on acid anhydrides;hydrolase activity, acting on acid anhydrides, in phosphorus-containing anhydrides;nucleic acid binding;nucleoside-triphosphatase activi…	cell part;cytoskeleton;intracellular non-membrane-bounded organelle;intracellular organelle;intracellular organelle part;intracellular part;macromolecular complex;microtubule cytoskeleton;non-membrane-bounded organelle;nuclear part;nucleoplasm part;organelle;organelle part;protein complex;transcription factor complex;transcription factor TFIIF complex	Basal transcription factors	Acetylation;ATP-binding;Completeproteome;DNA-binding;Helicase;Hydrolase;Nucleotide-binding;Nucleus;Phosphoprotein;Referenceproteome;Transcription;Transcriptionregulation	GO:0006139;GO:0006352;GO:0006355;GO:0006367;GO:0006807;GO:0008152;GO:0009058;GO:0009889;GO:0009987;GO:0010468;GO:0010556;GO:0016070;GO:0019219;GO:0019222;GO:0031323;GO:0031326;GO:0032774;GO:0034641;GO:0043170;GO:0044237;GO:0044238;GO:0044249;GO:0044260;GO:0050789;GO:0050794;GO:0051171;GO:0051252;GO:0060255;GO:0065007;GO:0080090;GO:0090304;GO:2000112	GO:0000166;GO:0003676;GO:0003677;GO:0003824;GO:0004386;GO:0005488;GO:0005524;GO:0008026;GO:0016462;GO:0016787;GO:0016817;GO:0016818;GO:0016887;GO:0017076;GO:0017111;GO:0030554;GO:0032553;GO:0032555;GO:0032559;GO:0035639;GO:0042623;GO:0070035	GO:0005667;GO:0005674;GO:0005856;GO:0015630;GO:0032991;GO:0043226;GO:0043228;GO:0043229;GO:0043232;GO:0043234;GO:0044422;GO:0044424;GO:0044428;GO:0044446;GO:0044451;GO:0044464
Q8VDJ3	Vigilin	Hdlbp	DEAGEGREAKETDPGSPRRCDIIIISGRKEK	S	944	0.76399	0.719941	0.687004	0.704248	*	0.000243755	3	-0.501875	-0.474049	-0.541611	-0.505845	4499800	Casein kinase I substrate motif;Cdc2 kinase substrate motif;CDK kinase substrate motif;CDK1,2,4,6 kinase substrate motif;ERK1,2 kinase substrate motif;Growth associated histone HI kinase substrate motif;GSK-3, ERK1, ERK2, CDK5 substrate motif;PKA kinase substrate motif;PKC kinase substrate motif;WW domain binding motif	alcohol metabolic process;cholesterol metabolic process;establishment of localization;lipid metabolic process;lipid transport;metabolic process;organic substance transport;primary metabolic process;small molecule metabolic process;steroid metabolic process;sterol metabolic process;transport	binding;nucleic acid binding;RNA binding	cell part;cytoplasm;extracellular region part;high-density lipoprotein particle;intracellular membrane-bounded organelle;intracellular organelle;intracellular part;macromolecular complex;membrane-bounded organelle;nucleus;organelle;plasma lipoprotein particle;protein-lipid complex		Acetylation;Cholesterolmetabolism;Completeproteome;Cytoplasm;HDL;Lipidmetabolism;Lipidtransport;Nucleus;Phosphoprotein;Referenceproteome;Repeat;RNA-binding;Steroidmetabolism;Sterolmetabolism;Transport	GO:0006066;GO:0006629;GO:0006810;GO:0006869;GO:0008152;GO:0008202;GO:0008203;GO:0016125;GO:0044238;GO:0044281;GO:0051234;GO:0071702	GO:0003676;GO:0003723;GO:0005488	GO:0005634;GO:0005737;GO:0032991;GO:0032994;GO:0034358;GO:0034364;GO:0043226;GO:0043227;GO:0043229;GO:0043231;GO:0044421;GO:0044424;GO:0044464
P43276	Histone H1.5	Hist1h1b	ETAPAETAAPAPVEKSPAKKKTTKKAGAAKR	S	18	0.51758	0.453826	0.61036	0.509834	*	0.000482306	3	-1.06365	-1.13979	-0.712269	-0.971901	576660000	Cdc2 kinase substrate motif;CDK kinase substrate motif;CDK1,2,4,6 kinase substrate motif;ERK1,2 kinase substrate motif;Growth associated histone HI kinase substrate motif;GSK-3, ERK1, ERK2, CDK5 substrate motif;WW domain binding motif	anatomical structure development;cellular component assembly;cellular component assembly at cellular level;cellular component organization;cellular component organization at cellular level;cellular component organization or biogenesis;cellular component organization or biogenesis at cellular level;cellular macromolecular complex assembly;cellular macromolecular complex subunit organization;cellul…	binding;DNA binding;nucleic acid binding	cell part;chromosomal part;intracellular membrane-bounded organelle;intracellular organelle;intracellular organelle part;intracellular part;macromolecular complex;membrane-bounded organelle;nucleosome;nucleus;organelle;organelle part;protein-DNA complex		Acetylation;Chromosome;Completeproteome;DNA-binding;Methylation;Nucleus;Phosphoprotein;Referenceproteome	GO:0006325;GO:0006334;GO:0006996;GO:0007517;GO:0009987;GO:0016043;GO:0022607;GO:0032502;GO:0034621;GO:0034622;GO:0034728;GO:0043933;GO:0048513;GO:0048856;GO:0051276;GO:0061061;GO:0065003;GO:0065004;GO:0071824;GO:0071840;GO:0071841;GO:0071842;GO:0071844	GO:0003676;GO:0003677;GO:0005488	GO:0000786;GO:0005634;GO:0032991;GO:0032993;GO:0043226;GO:0043227;GO:0043229;GO:0043231;GO:0044422;GO:0044424;GO:0044427;GO:0044446;GO:0044464
P15864	Histone H1.2	Hist1h1c	______________MSEAAPAAPAAAPPAEK	S	2	0.54458	0.364551	0.546557	0.464618	*	0.00103609	3	-0.990285	-1.45581	-0.871555	-1.10588	76321000	G protein-coupled receptor kinase 1 substrate motif	cellular component assembly;cellular component assembly at cellular level;cellular component organization;cellular component organization at cellular level;cellular component organization or biogenesis;cellular component organization or biogenesis at cellular level;cellular macromolecular complex assembly;cellular macromolecular complex subunit organization;cellular process;chromatin assembly;chr…	binding;DNA binding;nucleic acid binding	cell part;chromosomal part;intracellular membrane-bounded organelle;intracellular organelle;intracellular organelle part;intracellular part;macromolecular complex;membrane-bounded organelle;nucleosome;nucleus;organelle;organelle part;protein-DNA complex		Acetylation;Chromosome;Completeproteome;DNA-binding;Isopeptidebond;Methylation;Nucleus;Phosphoprotein;Referenceproteome;Ublconjugation	GO:0006325;GO:0006333;GO:0006334;GO:0006996;GO:0009987;GO:0016043;GO:0016584;GO:0022607;GO:0031497;GO:0034621;GO:0034622;GO:0034728;GO:0043933;GO:0051276;GO:0065003;GO:0065004;GO:0071824;GO:0071840;GO:0071841;GO:0071842;GO:0071844	GO:0003676;GO:0003677;GO:0005488	GO:0000786;GO:0005634;GO:0032991;GO:0032993;GO:0043226;GO:0043227;GO:0043229;GO:0043231;GO:0044422;GO:0044424;GO:0044427;GO:0044446;GO:0044464
P43277	Histone H1.2;Histone H1.3	Hist1h1c;Hist1h1d	KKAKKTGAAAGKRKASGPPVSELITKAVAAS;KKKAAKKPAGVRRKASGPPVSELITKAVAAS	S	37	0.59868	0.540442	0.680101	0.588098	*	0.000627723	3	-0.853643	-0.887789	-0.55618	-0.765871	23368000	14-3-3 domain binding motif;14-3-3 domain binding motif;AMP-activated protein kinase substrate motif;Calmodulin-dependent protein kinase I substrate motif;Calmodulin-dependent protein kinase II substrate motif;Calmodulin-dependent protein kinase II substrate motif;Calmodulin-dependent protein kinase IV substrate motif;Chk1 kinase substrate motif;Pim1 kinase substrate sequence;Pim1 kinase substrat…	cellular component assembly;cellular component assembly at cellular level;cellular component organization;cellular component organization at cellular level;cellular component organization or biogenesis;cellular component organization or biogenesis at cellular level;cellular macromolecular complex assembly;cellular macromolecular complex subunit organization;cellular process;chromatin assembly;chr…	binding;DNA binding;nucleic acid binding	cell part;chromatin;chromosomal part;intracellular organelle part;intracellular part;macromolecular complex;nuclear chromatin;nuclear chromosome part;nuclear part;nucleosome;organelle part;protein-DNA complex		Acetylation;Chromosome;Completeproteome;DNA-binding;Nucleus;Phosphoprotein;Referenceproteome	GO:0006325;GO:0006333;GO:0006334;GO:0006996;GO:0009987;GO:0016043;GO:0016584;GO:0022607;GO:0031497;GO:0034621;GO:0034622;GO:0034728;GO:0043933;GO:0051276;GO:0065003;GO:0065004;GO:0071824;GO:0071840;GO:0071841;GO:0071842;GO:0071844	GO:0003676;GO:0003677;GO:0005488	GO:0000785;GO:0000786;GO:0000790;GO:0032991;GO:0032993;GO:0044422;GO:0044424;GO:0044427;GO:0044428;GO:0044446;GO:0044454;GO:0044464
P43274	Histone H1.4	Hist1h1e	____________MSETAPAAPAAPAPAEKTP	T	4	0.59139	0.563626	0.494374	0.534053	*	< 0.0001	3	-0.871319	-0.82719	-1.01633	-0.904945	189540000	b-Adrenergic Receptor kinase substrate motif;G protein-coupled receptor kinase 1 substrate motif	cellular component assembly;cellular component assembly at cellular level;cellular component organization;cellular component organization at cellular level;cellular component organization or biogenesis;cellular component organization or biogenesis at cellular level;cellular macromolecular complex assembly;cellular macromolecular complex subunit organization;cellular process;chromatin assembly;chr…	binding;DNA binding;nucleic acid binding	cell part;chromosomal part;intracellular membrane-bounded organelle;intracellular organelle;intracellular organelle part;intracellular part;macromolecular complex;membrane-bounded organelle;nucleosome;nucleus;organelle;organelle part;protein-DNA complex		Acetylation;Chromosome;Completeproteome;DNA-binding;Methylation;Nucleus;Phosphoprotein;Referenceproteome	GO:0006325;GO:0006333;GO:0006334;GO:0006996;GO:0009987;GO:0016043;GO:0016584;GO:0022607;GO:0031497;GO:0034621;GO:0034622;GO:0034728;GO:0043933;GO:0051276;GO:0065003;GO:0065004;GO:0071824;GO:0071840;GO:0071841;GO:0071842;GO:0071844	GO:0003676;GO:0003677;GO:0005488	GO:0000786;GO:0005634;GO:0032991;GO:0032993;GO:0043226;GO:0043227;GO:0043229;GO:0043231;GO:0044422;GO:0044424;GO:0044427;GO:0044446;GO:0044464
P11499	Heat shock protein HSP 90-beta	Hsp90ab1	EDKEDEEKPKIEDVGSDEEDDSGKDKKKKTK	S	255	0.54893	0.449023	0.352496	0.431444	*	0.000633254	3	-0.978806	-1.15514	-1.50432	-1.21276	862180000	BARD1 BRCT domain binding motif;Casein kinase I substrate motif;Casein kinase II substrate motif	anatomical structure development;biological regulation;cellular component organization;cellular component organization or biogenesis;cellular macromolecule metabolic process;cellular metabolic process;cellular process;cellular protein metabolic process;cellular response to chemical stimulus;cellular response to cytokine stimulus;cellular response to interleukin-4;cellular response to organic cycl…	adenyl deoxyribonucleotide binding;adenyl nucleotide binding;adenyl ribonucleotide binding;ATP binding;binding;CTP binding;dATP binding;deoxyribonucleotide binding;enzyme regulator activity;GTP binding;guanyl nucleotide binding;guanyl ribonucleotide binding;nitric-oxide synthase regulator activity;nucleotide binding;protein binding;protein domain specific binding;purine deoxyribonucleotide bindin…	apical plasma membrane;basolateral plasma membrane;brush border membrane;cell part;cell projection membrane;cell projection part;cell surface;cytoplasmic membrane-bounded vesicle;cytoplasmic part;cytoplasmic vesicle;cytosol;inclusion body;intracellular membrane-bounded organelle;intracellular organelle;intracellular organelle part;intracellular part;macromolecular complex;melanosome;membrane part…	Antigen processing and presentation;NOD-like receptor signaling pathway;Pathways in cancer;Plant-pathogen interaction;Progesterone-mediated oocyte maturation;Prostate cancer;Protein processing in endoplasmic reticulum	Acetylation;ATP-binding;Chaperone;Completeproteome;Cytoplasm;Directproteinsequencing;Glycoprotein;Nucleotide-binding;Phosphoprotein;Referenceproteome;S-nitrosylation;Stressresponse;Ublconjugation	GO:0001890;GO:0001932;GO:0001959;GO:0002682;GO:0006457;GO:0006950;GO:0006970;GO:0008152;GO:0008361;GO:0009628;GO:0009651;GO:0009889;GO:0009891;GO:0009892;GO:0009893;GO:0009894;GO:0009895;GO:0009966;GO:0009987;GO:0010033;GO:0010605;GO:0010941;GO:0014070;GO:0016043;GO:0019220;GO:0019222;GO:0019538;GO:0023051;GO:0030162;GO:0031323;GO:0031324;GO:0031325;GO:0031326;GO:0031328;GO:0031329;GO:0031330;GO:…	GO:0000166;GO:0002134;GO:0002135;GO:0005488;GO:0005515;GO:0005524;GO:0005525;GO:0017076;GO:0019001;GO:0019103;GO:0019904;GO:0030234;GO:0030235;GO:0030554;GO:0030911;GO:0032552;GO:0032553;GO:0032554;GO:0032555;GO:0032557;GO:0032558;GO:0032559;GO:0032561;GO:0032564;GO:0035639	GO:0005739;GO:0005829;GO:0008180;GO:0009986;GO:0016023;GO:0016234;GO:0016323;GO:0016324;GO:0031253;GO:0031410;GO:0031526;GO:0031982;GO:0031988;GO:0032991;GO:0042470;GO:0043226;GO:0043227;GO:0043229;GO:0043231;GO:0043234;GO:0044422;GO:0044424;GO:0044425;GO:0044428;GO:0044444;GO:0044446;GO:0044459;GO:0044463;GO:0044464;GO:0048770
Q7TMY8	E3 ubiquitin-protein ligase HUWE1	Huwe1	TATTTVSTSTTKGSKSPAKVGEGGSGIDFKM	S	3557	0.76568	0.652048	0.610613	0.655605	*	0.002207	3	-0.498687	-0.61695	-0.711669	-0.609102	2358800	Cdc2 kinase substrate motif;CDK kinase substrate motif;CDK1,2,4,6 kinase substrate motif;ERK1,2 kinase substrate motif;Growth associated histone HI kinase substrate motif;GSK-3, ERK1, ERK2, CDK5 substrate motif;PKA kinase substrate motif;WW domain binding motif	base-excision repair;cell differentiation;cellular component organization;cellular component organization at cellular level;cellular component organization or biogenesis;cellular component organization or biogenesis at cellular level;cellular developmental process;cellular macromolecule metabolic process;cellular metabolic process;cellular nitrogen compound metabolic process;cellular process;cell…	acid-amino acid ligase activity;binding;catalytic activity;DNA binding;ligase activity;ligase activity, forming carbon-nitrogen bonds;nucleic acid binding;small conjugating protein ligase activity;ubiquitin-protein ligase activity	cell part;cytoplasm;intracellular membrane-bounded organelle;intracellular organelle;intracellular part;membrane-bounded organelle;nucleus;organelle	Ubiquitin mediated proteolysis	Alternativesplicing;Completeproteome;Cytoplasm;Differentiation;Directproteinsequencing;DNA-binding;DNAdamage;DNArepair;Ligase;Nucleus;Phosphoprotein;Referenceproteome;Ublconjugationpathway	GO:0000209;GO:0006139;GO:0006259;GO:0006281;GO:0006284;GO:0006325;GO:0006464;GO:0006513;GO:0006807;GO:0006950;GO:0006974;GO:0006996;GO:0008152;GO:0009987;GO:0016043;GO:0016567;GO:0016568;GO:0016569;GO:0016570;GO:0016574;GO:0019538;GO:0030154;GO:0032446;GO:0032502;GO:0033554;GO:0034641;GO:0042787;GO:0043170;GO:0043412;GO:0044237;GO:0044238;GO:0044260;GO:0044267;GO:0048869;GO:0050896;GO:0051276;GO:…	GO:0003676;GO:0003677;GO:0003824;GO:0004842;GO:0005488;GO:0016874;GO:0016879;GO:0016881;GO:0019787	GO:0005634;GO:0005737;GO:0043226;GO:0043227;GO:0043229;GO:0043231;GO:0044424;GO:0044464
Q8BU33	Acetolactate synthase-like protein	Ilvbl	VVVNILIGRTDFRDGSISV____________	S	629	0.79648	0.80751	0.865772	0.801407	*	0.00119271	3	-0.44179	-0.308448	-0.207942	-0.319393	751480	14-3-3 domain binding motif;Calmodulin-dependent protein kinase II substrate motif;Casein kinase II substrate motif;MAPKAPK2 kinase substrate motif;Phosphorylase kinase substrate motif;PKA kinase substrate motif;PKC kinase substrate motif	metabolic process	binding;catalytic activity;cation binding;coenzyme binding;cofactor binding;ion binding;magnesium ion binding;metal ion binding;thiamine pyrophosphate binding;transferase activity;vitamin binding	cell part;integral to membrane;intrinsic to membrane;membrane part		Alternativesplicing;Completeproteome;Magnesium;Membrane;Metal-binding;Referenceproteome;Thiaminepyrophosphate;Transferase;Transmembrane;Transmembranehelix	GO:0008152	GO:0000287;GO:0003824;GO:0005488;GO:0016740;GO:0019842;GO:0030976;GO:0043167;GO:0043169;GO:0046872;GO:0048037;GO:0050662	GO:0016021;GO:0031224;GO:0044425;GO:0044464
P55200	Histone-lysine N-methyltransferase 2A;MLL cleavage product N320;MLL cleavage product C180	Kmt2a	KGPGEPDSPTPLHPPTPPILSTDRSREDSPE	T	1847	0.68175	0.727669	0.787453	0.712097	*	0.000940886	3	-0.666186	-0.458645	-0.344735	-0.489855	2586700	AMP-activated protein kinase substrate motif;DNA dependent Protein kinase substrate motif;ERK1,2 kinase substrate motif;GSK3, Erk1, Erk2 and CDK5 kinase motif;GSK-3, ERK1, ERK2, CDK5 substrate motif;WW domain binding motif	anatomical structure development;anterior/posterior pattern specification;biological regulation;biosynthetic process;cellular biosynthetic process;cellular component organization;cellular component organization at cellular level;cellular component organization or biogenesis;cellular component organization or biogenesis at cellular level;cellular macromolecule biosynthetic process;cellular macromo…	binding;catalytic activity;cation binding;chromatin binding;DNA binding;histone acetyl-lysine binding;histone binding;histone methyltransferase activity;histone methyltransferase activity (H3-K4 specific);histone-lysine N-methyltransferase activity;ion binding;lysine N-methyltransferase activity;metal ion binding;methyltransferase activity;N-methyltransferase activity;nucleic acid binding;protein…	cell part;histone methyltransferase complex;intracellular organelle part;intracellular part;macromolecular complex;methyltransferase complex;MLL1 complex;nuclear part;nucleoplasm part;organelle part;protein complex		Acetylation;Alternativesplicing;Bromodomain;Chromatinregulator;Completeproteome;DNA-binding;Isopeptidebond;Metal-binding;Methyltransferase;Nucleus;Phosphoprotein;Polymorphism;Referenceproteome;Repeat;S-adenosyl-L-methionine;Transcription;Transcriptionregulation;Transferase;Ublconjugation;Zinc;Zinc-finger	GO:0003002;GO:0006139;GO:0006259;GO:0006304;GO:0006305;GO:0006306;GO:0006325;GO:0006351;GO:0006355;GO:0006357;GO:0006464;GO:0006473;GO:0006475;GO:0006730;GO:0006807;GO:0006996;GO:0007389;GO:0008152;GO:0008285;GO:0009058;GO:0009059;GO:0009889;GO:0009891;GO:0009893;GO:0009952;GO:0009987;GO:0010468;GO:0010556;GO:0010557;GO:0010604;GO:0010628;GO:0016043;GO:0016070;GO:0016568;GO:0016569;GO:0016570;GO:…	GO:0003676;GO:0003677;GO:0003682;GO:0003824;GO:0005488;GO:0005515;GO:0008168;GO:0008170;GO:0008270;GO:0008276;GO:0008757;GO:0016278;GO:0016279;GO:0016740;GO:0016741;GO:0018024;GO:0042054;GO:0042393;GO:0042800;GO:0043167;GO:0043169;GO:0043565;GO:0045322;GO:0046872;GO:0046914;GO:0070577	GO:0032991;GO:0034708;GO:0035097;GO:0043234;GO:0044422;GO:0044424;GO:0044428;GO:0044446;GO:0044451;GO:0044464;GO:0071339
Q9D8N6	Protein lin-37 homolog	Lin37	KSHMDRERLDEEAGKTPLDTHNKDCSIAATG	T	47	0.10268	0.0721506	0.0385823	0.0641676	*	< 0.0001	3	-3.39727	-3.79285	-4.69592	-3.96201	884060	Casein kinase II substrate motif;G protein-coupled receptor kinase 1 substrate motif;Growth associated histone HI kinase substrate motif;GSK-3, ERK1, ERK2, CDK5 substrate motif;WW domain binding motif					Completeproteome;Phosphoprotein;Referenceproteome
P14733	Lamin-B1	Lmnb1	__MATATPVQQQRAGSRASAPATPLSPTRLS	S	14	0.83183	0.810497	0.799685	0.792829	*	< 0.0001	3	-0.37914	-0.303121	-0.322496	-0.334919	21449000	14-3-3 domain binding motif;Calmodulin-dependent protein kinase II substrate motif;Casein kinase II substrate motif;G protein-coupled receptor kinase 1 substrate motif;PKA kinase substrate motif;PKC kinase substrate motif	biological regulation;positive regulation of biological process;positive regulation of catalytic activity;positive regulation of cell communication;positive regulation of cell cycle;positive regulation of cellular process;positive regulation of cyclin-dependent protein kinase activity;positive regulation of cyclin-dependent protein kinase activity involved in G2/M;positive regulation of intracell…	binding;enzyme binding;JUN kinase binding;kinase binding;protein binding;protein kinase binding;structural molecule activity	cell part;cytoskeletal part;envelope;intermediate filament;intracellular organelle part;intracellular part;lamin filament;macromolecular complex;membrane;nuclear envelope;nuclear inner membrane;nuclear membrane;nuclear part;nucleoplasm;organelle envelope;organelle inner membrane;organelle membrane;organelle part;protein complex		Acetylation;Coiledcoil;Completeproteome;Directproteinsequencing;Disulfidebond;Intermediatefilament;Lipoprotein;Membrane;Methylation;Nucleus;Phosphoprotein;Prenylation;Referenceproteome	GO:0000079;GO:0001932;GO:0009966;GO:0009967;GO:0010627;GO:0010646;GO:0010647;GO:0010740;GO:0019220;GO:0019222;GO:0023051;GO:0023056;GO:0031323;GO:0031399;GO:0031660;GO:0031662;GO:0032268;GO:0033674;GO:0042325;GO:0043085;GO:0043408;GO:0043410;GO:0043549;GO:0044093;GO:0045737;GO:0045787;GO:0045859;GO:0045860;GO:0046328;GO:0046330;GO:0048518;GO:0048522;GO:0048583;GO:0048584;GO:0050789;GO:0050790;GO:…	GO:0005198;GO:0005488;GO:0005515;GO:0008432;GO:0019899;GO:0019900;GO:0019901	GO:0005635;GO:0005637;GO:0005638;GO:0005654;GO:0005882;GO:0016020;GO:0019866;GO:0031090;GO:0031965;GO:0031967;GO:0031975;GO:0032991;GO:0043234;GO:0044422;GO:0044424;GO:0044428;GO:0044430;GO:0044446;GO:0044464
O88855	Leukotriene B4 receptor 1	Ltb4r	LEGTGSEVSSTRRGGTLVQTPKDTPACPEPG	T	320	0.48797	0.396179	0.56214	0.464858	*	0.000418414	3	-1.14864	-1.33578	-0.830999	-1.10514	9103400	Calmodulin-dependent protein kinase II substrate motif;G protein-coupled receptor kinase 1 substrate motif;PKC kinase substrate motif	defense response;inflammatory response;response to stimulus;response to stress;response to wounding	G-protein coupled receptor activity;leukotriene B4 receptor activity;leukotriene receptor activity;molecular transducer activity;receptor activity;signal transducer activity;signaling receptor activity;transmembrane signaling receptor activity	cell part;integral to membrane;intrinsic to membrane;membrane;membrane part;plasma membrane	Neuroactive ligand-receptor interaction	Cellmembrane;Completeproteome;Glycoprotein;G-proteincoupledreceptor;Membrane;Phosphoprotein;Receptor;Referenceproteome;Transducer;Transmembrane;Transmembranehelix	GO:0006950;GO:0006952;GO:0006954;GO:0009611;GO:0050896	GO:0001632;GO:0004871;GO:0004872;GO:0004888;GO:0004930;GO:0004974;GO:0038023;GO:0060089	GO:0005886;GO:0016020;GO:0016021;GO:0031224;GO:0044425;GO:0044464
Q9QXZ0	Microtubule-actin cross-linking factor 1	Macf1	LGVTRLLDAEDVDVPSPDEKSVITYVSSIYD	S	280	0.70602	0.599422	0.704413	0.650734	*	0.000726109	3	-0.615719	-0.738357	-0.505506	-0.619861	1910100	Casein kinase I substrate motif;Casein kinase II substrate motif;DNA dependent Protein kinase substrate motif;ERK1,2 kinase substrate motif;GSK-3, ERK1, ERK2, CDK5 substrate motif;WW domain binding motif	anatomical structure formation involved in morphogenesis;biological regulation;cell cycle arrest;cell cycle process;cell surface receptor linked signaling pathway;cellular component movement;cellular process;cellular response to stimulus;developmental process;establishment of localization;establishment of localization in cell;establishment of protein localization;establishment of protein localiza…	actin binding;ATPase activity;binding;calcium ion binding;catalytic activity;cation binding;cytoskeletal protein binding;hydrolase activity;hydrolase activity, acting on acid anhydrides;hydrolase activity, acting on acid anhydrides, in phosphorus-containing anhydrides;ion binding;metal ion binding;microtubule binding;nucleoside-triphosphatase activity;protein binding;pyrophosphatase activity;tubu…	actin cytoskeleton;cell part;cell projection membrane;cell projection part;cytoplasmic part;cytoskeletal part;cytoskeleton;Golgi apparatus;intracellular membrane-bounded organelle;intracellular non-membrane-bounded organelle;intracellular organelle;intracellular organelle part;intracellular part;leading edge membrane;macromolecular complex;membrane part;membrane-bounded organelle;microtubule;non-…		Acetylation;Actin-binding;Alternativesplicing;Calcium;Cellmembrane;Cellprojection;Completeproteome;Cytoplasm;Cytoskeleton;Directproteinsequencing;Golgiapparatus;Leucine-richrepeat;Membrane;Metal-binding;Microtubule;Phosphoprotein;Referenceproteome;Repeat;SH3domain;Wntsignalingpathway	GO:0001704;GO:0001707;GO:0001952;GO:0006605;GO:0006612;GO:0006620;GO:0006810;GO:0006886;GO:0006892;GO:0006893;GO:0006928;GO:0006950;GO:0007050;GO:0007163;GO:0007165;GO:0007166;GO:0009611;GO:0009966;GO:0009967;GO:0009987;GO:0010632;GO:0010646;GO:0010647;GO:0010810;GO:0015031;GO:0016055;GO:0016192;GO:0022402;GO:0023051;GO:0023056;GO:0030111;GO:0030155;GO:0030177;GO:0030334;GO:0032502;GO:0032879;GO:…	GO:0003779;GO:0003824;GO:0005488;GO:0005509;GO:0005515;GO:0008017;GO:0008092;GO:0015631;GO:0016462;GO:0016787;GO:0016817;GO:0016818;GO:0016887;GO:0017111;GO:0043167;GO:0043169;GO:0046872	GO:0005794;GO:0005856;GO:0005874;GO:0015629;GO:0031253;GO:0031256;GO:0032587;GO:0032991;GO:0043226;GO:0043227;GO:0043228;GO:0043229;GO:0043231;GO:0043232;GO:0043234;GO:0044422;GO:0044424;GO:0044425;GO:0044430;GO:0044444;GO:0044446;GO:0044459;GO:0044463;GO:0044464
P27546	Microtubule-associated protein 4	Map4	TVSAPDLKSVRSKVGSTENIKHQPGGGRAKV	S	914	0.8378	0.784184	0.809278	0.789156	*	0.000255803	3	-0.368823	-0.350737	-0.305292	-0.341617	20650000	Casein kinase II substrate motif;MAPKAPK2 kinase substrate motif;PKA kinase substrate motif;PKC kinase substrate motif	cell cycle process;cell division;cellular component movement;cellular component organization;cellular component organization at cellular level;cellular component organization or biogenesis;cellular component organization or biogenesis at cellular level;cellular process;cytoskeleton organization;establishment of localization;establishment of localization in cell;establishment of organelle localiza…	binding;cytoskeletal protein binding;microtubule binding;protein binding;tubulin binding	cell part;cytoplasm;cytoskeletal part;intracellular non-membrane-bounded organelle;intracellular organelle;intracellular organelle part;intracellular part;macromolecular complex;membrane;microtubule;mitotic spindle;non-membrane-bounded organelle;organelle;organelle part;plasma membrane;protein complex;spindle		Acetylation;Alternativesplicing;Completeproteome;Cytoplasm;Cytoskeleton;Microtubule;Phosphoprotein;Referenceproteome;Repeat	GO:0000226;GO:0006928;GO:0006996;GO:0007010;GO:0007017;GO:0007018;GO:0007051;GO:0007052;GO:0009987;GO:0016043;GO:0022402;GO:0051012;GO:0051234;GO:0051293;GO:0051294;GO:0051301;GO:0051649;GO:0051656;GO:0071840;GO:0071841;GO:0071842	GO:0005488;GO:0005515;GO:0008017;GO:0008092;GO:0015631	GO:0005737;GO:0005819;GO:0005874;GO:0005886;GO:0016020;GO:0032991;GO:0043226;GO:0043228;GO:0043229;GO:0043232;GO:0043234;GO:0044422;GO:0044424;GO:0044430;GO:0044446;GO:0044464;GO:0072686
A2AGH6	Mediator of RNA polymerase II transcription subunit 12	Med12	SRGDLAFGAPGPRPPSPFDDPTDDPERKEAE	S	636	0.77408	0.730467	0.786488	0.743539	*	0.000154828	3	-0.482946	-0.45311	-0.346503	-0.42752	5325800	14-3-3 domain binding motif;Calmodulin-dependent protein kinase II substrate motif;Casein kinase II substrate motif;DNA dependent Protein kinase substrate motif;ERK1,2 kinase substrate motif;GSK-3, ERK1, ERK2, CDK5 substrate motif;PKA kinase substrate motif;PKC kinase substrate motif;Pyruvate dehydrogenase kinase substrate motif;WW domain binding motif	anatomical structure development;anatomical structure formation involved in morphogenesis;androgen receptor signaling pathway;axis elongation;axis elongation involved in somitogenesis;biological regulation;biosynthetic process;canonical Wnt receptor signaling pathway;cell surface receptor linked signaling pathway;cellular biosynthetic process;cellular macromolecule metabolic process;cellular meta…	binding;chromatin binding;protein binding transcription factor activity;receptor activity;RNA polymerase II transcription cofactor activity;RNA polymerase II transcription factor binding transcription factor activity;transcription coactivator activity;transcription cofactor activity;transcription factor binding transcription factor activity	cell part;intracellular organelle part;intracellular part;macromolecular complex;mediator complex;nuclear part;nucleoplasm part;organelle part;protein complex		Activator;Alternativesplicing;Completeproteome;Nucleus;Phosphoprotein;Referenceproteome;Repressor;Transcription;Transcriptionregulation	GO:0001843;GO:0003401;GO:0006139;GO:0006352;GO:0006355;GO:0006357;GO:0006367;GO:0006807;GO:0007165;GO:0007166;GO:0007507;GO:0008152;GO:0009058;GO:0009889;GO:0009891;GO:0009893;GO:0009966;GO:0009968;GO:0009987;GO:0010468;GO:0010556;GO:0010557;GO:0010604;GO:0010628;GO:0010646;GO:0010648;GO:0016055;GO:0016070;GO:0019219;GO:0019222;GO:0019827;GO:0022603;GO:0023051;GO:0023057;GO:0030111;GO:0030178;GO:…	GO:0000988;GO:0000989;GO:0001076;GO:0001104;GO:0003682;GO:0003712;GO:0003713;GO:0004872;GO:0005488	GO:0016592;GO:0032991;GO:0043234;GO:0044422;GO:0044424;GO:0044428;GO:0044446;GO:0044451;GO:0044464
E9PVX6		Mki67	PVPEKKRAASSKRHVSPEPVKMKHLKIVSNK	S	2980	0.56736	0.474825	0.519808	0.505851	*	< 0.0001	3	-0.931164	-1.07453	-0.943949	-0.983215	21479000	14-3-3 domain binding motif;Calmodulin-dependent protein kinase II substrate motif;Casein kinase II substrate motif;ERK1,2 kinase substrate motif;GSK-3, ERK1, ERK2, CDK5 substrate motif;PKA kinase substrate motif;PKC kinase substrate motif;WW domain binding motif	anatomical structure morphogenesis;cell cycle phase;cell cycle process;cell proliferation;cellular macromolecule metabolic process;cellular metabolic process;cellular nitrogen compound metabolic process;cellular process;cellular response to heat;cellular response to stimulus;cellular response to stress;developmental process;DNA metabolic process;macromolecule metabolic process;meiosis;metabolic p…		cell part;chromosomal part;chromosome;chromosome, centromeric region;condensed chromosome;cytoplasm;intracellular non-membrane-bounded organelle;intracellular organelle;intracellular organelle part;intracellular part;non-membrane-bounded organelle;nuclear part;nucleolus;organelle;organelle part		Completeproteome;Referenceproteome	GO:0006139;GO:0006259;GO:0006807;GO:0006950;GO:0007126;GO:0008152;GO:0008283;GO:0009266;GO:0009408;GO:0009628;GO:0009653;GO:0009887;GO:0009987;GO:0022402;GO:0022403;GO:0031099;GO:0031100;GO:0032502;GO:0033554;GO:0034605;GO:0034641;GO:0043170;GO:0044237;GO:0044238;GO:0044260;GO:0050896;GO:0051716;GO:0090304		GO:0000775;GO:0000793;GO:0005694;GO:0005730;GO:0005737;GO:0043226;GO:0043228;GO:0043229;GO:0043232;GO:0044422;GO:0044424;GO:0044427;GO:0044428;GO:0044446;GO:0044464
E9PVX6		Mki67	RSQHGILQMICSKRRSGASEANLIVAKSWAD	S	588	0.90949	0.895221	0.891252	0.875361	*	< 0.0001	3	-0.250371	-0.159684	-0.166095	-0.19205	1079400	Casein kinase II substrate motif;MAPKAPK2 kinase substrate motif;PAK2 kinase substrate motif;PKA kinase substrate motif;PKC kinase substrate motif	anatomical structure morphogenesis;cell cycle phase;cell cycle process;cell proliferation;cellular macromolecule metabolic process;cellular metabolic process;cellular nitrogen compound metabolic process;cellular process;cellular response to heat;cellular response to stimulus;cellular response to stress;developmental process;DNA metabolic process;macromolecule metabolic process;meiosis;metabolic p…		cell part;chromosomal part;chromosome;chromosome, centromeric region;condensed chromosome;cytoplasm;intracellular non-membrane-bounded organelle;intracellular organelle;intracellular organelle part;intracellular part;non-membrane-bounded organelle;nuclear part;nucleolus;organelle;organelle part		Completeproteome;Referenceproteome	GO:0006139;GO:0006259;GO:0006807;GO:0006950;GO:0007126;GO:0008152;GO:0008283;GO:0009266;GO:0009408;GO:0009628;GO:0009653;GO:0009887;GO:0009987;GO:0022402;GO:0022403;GO:0031099;GO:0031100;GO:0032502;GO:0033554;GO:0034605;GO:0034641;GO:0043170;GO:0044237;GO:0044238;GO:0044260;GO:0050896;GO:0051716;GO:0090304		GO:0000775;GO:0000793;GO:0005694;GO:0005730;GO:0005737;GO:0043226;GO:0043228;GO:0043229;GO:0043232;GO:0044422;GO:0044424;GO:0044427;GO:0044428;GO:0044446;GO:0044464
Q9WVG9	Male-specific lethal 3 homolog	Msl3	FLHLEKKTPVHSRSSSPIPLTPSKDGSAVFA	S	404	0.84754	0.831547	0.900693	0.83718	*	0.00257879	3	-0.352147	-0.266129	-0.150893	-0.25639	3424700	14-3-3 domain binding motif;Calmodulin-dependent protein kinase II substrate motif;ERK1,2 kinase substrate motif;GSK-3, ERK1, ERK2, CDK5 substrate motif;MAPKAPK2 kinase substrate motif;MDC1 BRCT domain binding motif;PKA kinase substrate motif;PKC kinase substrate motif;Plk1 PBD domain binding motif;WW domain binding motif	biological regulation;biosynthetic process;cellular biosynthetic process;cellular component organization;cellular component organization at cellular level;cellular component organization or biogenesis;cellular component organization or biogenesis at cellular level;cellular macromolecule biosynthetic process;cellular macromolecule metabolic process;cellular metabolic process;cellular nitrogen comp…	binding;DNA binding;histone binding;methylated histone residue binding;nucleic acid binding;protein binding	cell part;histone acetyltransferase complex;intracellular organelle part;intracellular part;macromolecular complex;MSL complex;nuclear part;nucleoplasm part;organelle part;protein complex		Alternativesplicing;Chromatinregulator;Completeproteome;DNA-binding;Nucleus;Phosphoprotein;Referenceproteome;Transcription;Transcriptionregulation	GO:0006139;GO:0006325;GO:0006351;GO:0006355;GO:0006464;GO:0006473;GO:0006475;GO:0006807;GO:0006996;GO:0008152;GO:0009058;GO:0009059;GO:0009889;GO:0009987;GO:0010468;GO:0010556;GO:0016043;GO:0016070;GO:0016568;GO:0016569;GO:0016570;GO:0016573;GO:0018193;GO:0018205;GO:0018393;GO:0018394;GO:0019219;GO:0019222;GO:0019538;GO:0031323;GO:0031326;GO:0032774;GO:0034641;GO:0034645;GO:0043170;GO:0043412;GO:…	GO:0003676;GO:0003677;GO:0005488;GO:0005515;GO:0035064;GO:0042393	GO:0000123;GO:0032991;GO:0043234;GO:0044422;GO:0044424;GO:0044428;GO:0044446;GO:0044451;GO:0044464;GO:0072487
P06876	Transcriptional activator Myb	Myb	ESGPPLLKKIKQEVESPTEKSGNFFCSNHWA	S	528	0.92485	0.893372	0.886227	0.877999	*	0.00114865	3	-0.226209	-0.162667	-0.174252	-0.187709	614040	b-Adrenergic Receptor kinase substrate motif;Casein kinase I substrate motif;Casein kinase II substrate motif;ERK1,2 kinase substrate motif;GSK-3, ERK1, ERK2, CDK5 substrate motif;WW domain binding motif	anatomical structure development;B cell activation;B cell differentiation;biological regulation;biosynthetic process;calcium ion transport;cation transport;cell activation;cell cycle process;cell differentiation;cellular biosynthetic process;cellular component organization;cellular component organization at cellular level;cellular component organization or biogenesis;cellular component organizati…	binding;chromatin binding;DNA binding;nucleic acid binding;nucleic acid binding transcription factor activity;sequence-specific DNA binding transcription factor activity	cell part;intracellular organelle part;intracellular part;nuclear part;nucleoplasm;organelle part		3D-structure;Acetylation;Activator;Completeproteome;DNA-binding;Nucleus;Phosphoprotein;Proto-oncogene;Referenceproteome;Repeat;Transcription;Transcriptionregulation;Ublconjugation	GO:0000082;GO:0000122;GO:0001701;GO:0001775;GO:0002376;GO:0002521;GO:0002682;GO:0002684;GO:0002694;GO:0002696;GO:0002697;GO:0002699;GO:0006139;GO:0006325;GO:0006338;GO:0006351;GO:0006355;GO:0006357;GO:0006807;GO:0006810;GO:0006811;GO:0006812;GO:0006816;GO:0006996;GO:0008152;GO:0009058;GO:0009059;GO:0009790;GO:0009792;GO:0009889;GO:0009890;GO:0009891;GO:0009892;GO:0009893;GO:0009987;GO:0010468;GO:…	GO:0001071;GO:0003676;GO:0003677;GO:0003682;GO:0003700;GO:0005488	GO:0005654;GO:0044422;GO:0044424;GO:0044428;GO:0044446;GO:0044464
Q9D6Z1	Nucleolar protein 56	Nop56	SSAKRKKSSPKEEVASEPEEAASPTTPKKKR	S	536	0.67352	0.467182	0.498256	0.52526	*	0.00211926	3	-0.683708	-1.09794	-1.00504	-0.928897	1005900000	Casein kinase I substrate motif;Casein kinase II substrate motif;G protein-coupled receptor kinase 1 substrate motif	cellular component biogenesis;cellular component biogenesis at cellular level;cellular component organization or biogenesis;cellular component organization or biogenesis at cellular level;cellular process;ribonucleoprotein complex biogenesis;ribosome biogenesis	binding;nucleic acid binding;RNA binding;snoRNA binding	cell part;cytoplasm;intracellular non-membrane-bounded organelle;intracellular organelle;intracellular organelle part;intracellular part;macromolecular complex;non-membrane-bounded organelle;nuclear part;nucleolus;organelle;organelle part;pre-snoRNP complex;ribonucleoprotein complex;small nucleolar ribonucleoprotein complex	Ribosome biogenesis in eukaryotes	Completeproteome;Cytoplasm;Nucleus;Phosphoprotein;Referenceproteome;Ribosomebiogenesis	GO:0009987;GO:0022613;GO:0042254;GO:0044085;GO:0071840;GO:0071841;GO:0071843	GO:0003676;GO:0003723;GO:0005488;GO:0030515	GO:0005730;GO:0005732;GO:0005737;GO:0030529;GO:0032991;GO:0043226;GO:0043228;GO:0043229;GO:0043232;GO:0044422;GO:0044424;GO:0044428;GO:0044446;GO:0044464;GO:0070761
B2RRE7	OTU domain-containing protein 4	Otud4	KPEKVKDPKTAADVVSPGANSVDRLQRPKEE	S	1000	0.79724	0.791722	0.863234	0.795624	*	0.00135679	3	-0.440414	-0.336934	-0.212177	-0.329842	2594600	Casein kinase I substrate motif;ERK1,2 kinase substrate motif;GSK-3, ERK1, ERK2, CDK5 substrate motif;WW domain binding motif					Acetylation;Completeproteome;Phosphoprotein;Referenceproteome
Q69Z38	Pseudopodium-enriched atypical kinase 1	Peak1	GSMKDSQGKHVILSGSAEVISNEGGRFCYPE	S	215	0.8224	0.754646	0.792732	0.769004	*	0.000430211	3	-0.395588	-0.406127	-0.335096	-0.378937	2565400	Casein kinase II substrate motif	anatomical structure morphogenesis;biological adhesion;cell adhesion;cell migration;cell morphogenesis;cell morphogenesis involved in differentiation;cell motility;cell-substrate adhesion;cellular component morphogenesis;cellular component movement;cellular component organization;cellular component organization or biogenesis;cellular developmental process;cellular macromolecule metabolic process;…	adenyl nucleotide binding;adenyl ribonucleotide binding;ATP binding;binding;catalytic activity;kinase activity;non-membrane spanning protein tyrosine kinase activity;nucleotide binding;phosphotransferase activity, alcohol group as acceptor;protein kinase activity;protein tyrosine kinase activity;purine nucleotide binding;purine ribonucleoside triphosphate binding;purine ribonucleotide binding;rib…	actin cytoskeleton;adherens junction;anchoring junction;cell junction;cell part;cell-substrate adherens junction;cell-substrate junction;cytoplasm;cytoskeleton;focal adhesion;intracellular non-membrane-bounded organelle;intracellular organelle;intracellular part;non-membrane-bounded organelle;organelle		ATP-binding;Celljunction;Completeproteome;Cytoplasm;Cytoskeleton;Kinase;Nucleotide-binding;Phosphoprotein;Referenceproteome;Transferase;Tyrosine-proteinkinase	GO:0000902;GO:0000904;GO:0006464;GO:0006468;GO:0006793;GO:0006796;GO:0006928;GO:0007155;GO:0008152;GO:0009653;GO:0009987;GO:0016043;GO:0016310;GO:0016477;GO:0019538;GO:0022610;GO:0031589;GO:0032502;GO:0032989;GO:0034446;GO:0040011;GO:0043170;GO:0043412;GO:0044237;GO:0044238;GO:0044260;GO:0044267;GO:0046777;GO:0048869;GO:0048870;GO:0071840	GO:0000166;GO:0003824;GO:0004672;GO:0004713;GO:0004715;GO:0005488;GO:0005524;GO:0016301;GO:0016740;GO:0016772;GO:0016773;GO:0017076;GO:0030554;GO:0032553;GO:0032555;GO:0032559;GO:0035639	GO:0005737;GO:0005856;GO:0005912;GO:0005924;GO:0005925;GO:0015629;GO:0030054;GO:0030055;GO:0043226;GO:0043228;GO:0043229;GO:0043232;GO:0044424;GO:0044464;GO:0070161
O55022	Membrane-associated progesterone receptor component 1	Pgrmc1	HVGKLLKEGEEPTVYSDDEEPKDETARKNE_	S	181	0.51213	0.489617	0.559856	0.50627	*	< 0.0001	3	-1.07892	-1.03027	-0.836873	-0.982022	257760000	BARD1 BRCT domain binding motif;Casein kinase II substrate motif	axon guidance;chemotaxis;locomotion;response to chemical stimulus;response to external stimulus;response to stimulus;taxis	binding;cation binding;heme binding;ion binding;iron ion binding;lipid binding;metal ion binding;steroid binding;tetrapyrrole binding;transition metal ion binding	cell part;cell surface;cytoplasmic part;endoplasmic reticulum membrane;endoplasmic reticulum part;integral to membrane;intracellular non-membrane-bounded organelle;intracellular organelle;intracellular organelle part;intracellular part;intrinsic to membrane;membrane;membrane part;non-membrane-bounded organelle;nuclear part;nucleolus;organelle;organelle membrane;organelle part		Completeproteome;Directproteinsequencing;Endoplasmicreticulum;Lipid-binding;Membrane;Microsome;Phosphoprotein;Receptor;Referenceproteome;Steroid-binding;Transmembrane;Transmembranehelix	GO:0006935;GO:0007411;GO:0009605;GO:0040011;GO:0042221;GO:0042330;GO:0050896	GO:0005488;GO:0005496;GO:0005506;GO:0008289;GO:0020037;GO:0043167;GO:0043169;GO:0046872;GO:0046906;GO:0046914	GO:0005730;GO:0005789;GO:0009986;GO:0016020;GO:0016021;GO:0031090;GO:0031224;GO:0043226;GO:0043228;GO:0043229;GO:0043232;GO:0044422;GO:0044424;GO:0044425;GO:0044428;GO:0044432;GO:0044444;GO:0044446;GO:0044464
Q6ZQB6	Inositol hexakisphosphate and diphosphoinositol-pentakisphosphate kinase 2	Ppip5k2	RFFHHAEEEEEEEDESPPERQIVVGICSMAK	S	44	0.79851	0.69799	0.784103	0.739228	*	0.0015757	3	-0.438118	-0.518722	-0.350885	-0.435909	14369000	b-Adrenergic Receptor kinase substrate motif;Casein kinase I substrate motif;Casein kinase II substrate motif;ERK1,2 kinase substrate motif;GSK-3, ERK1, ERK2, CDK5 substrate motif;WW domain binding motif	alcohol metabolic process;carbohydrate metabolic process;cellular carbohydrate metabolic process;cellular metabolic process;cellular process;inositol metabolic process;metabolic process;polyol metabolic process;primary metabolic process;small molecule metabolic process	acid phosphatase activity;adenyl nucleotide binding;adenyl ribonucleotide binding;ATP binding;binding;catalytic activity;diphosphoinositol-pentakisphosphate kinase activity;hydrolase activity;hydrolase activity, acting on ester bonds;inositol 1,3,4,5,6-pentakisphosphate kinase activity;inositol hexakisphosphate 1-kinase activity;inositol hexakisphosphate 3-kinase activity;inositol hexakisphosphat…	cell part;cytoplasmic part;cytosol;intracellular part		Alternativesplicing;ATP-binding;Completeproteome;Cytoplasm;Kinase;Nucleotide-binding;Phosphoprotein;Referenceproteome;Transferase	GO:0005975;GO:0006020;GO:0006066;GO:0008152;GO:0009987;GO:0019751;GO:0044237;GO:0044238;GO:0044262;GO:0044281	GO:0000166;GO:0000826;GO:0000827;GO:0000828;GO:0000832;GO:0003824;GO:0003993;GO:0004428;GO:0005488;GO:0005524;GO:0016301;GO:0016740;GO:0016772;GO:0016776;GO:0016787;GO:0016788;GO:0016791;GO:0017076;GO:0030554;GO:0032553;GO:0032555;GO:0032559;GO:0033857;GO:0035639;GO:0042578;GO:0052723;GO:0052724	GO:0005829;GO:0044424;GO:0044444;GO:0044464
Q8BQ30	Phostensin	Ppp1r18	ETPEESLRLAGSGDDSPKRKEVLESILSPGE	S	212	0.7747	0.639484	0.677055	0.67682	*	0.00167633	3	-0.481791	-0.645019	-0.562655	-0.563155	1702000	b-Adrenergic Receptor kinase substrate motif;Cdc2 kinase substrate motif;CDK kinase substrate motif;CDK1,2,4,6 kinase substrate motif;ERK1,2 kinase substrate motif;Growth associated histone HI kinase substrate motif;GSK-3, ERK1, ERK2, CDK5 substrate motif;MAPKAPK2 kinase substrate motif;PKA kinase substrate motif;PKC kinase substrate motif;WW domain binding motif			cell part;cytoplasm;cytoskeleton;intracellular non-membrane-bounded organelle;intracellular organelle;intracellular part;non-membrane-bounded organelle;organelle		Actin-binding;Alternativesplicing;Completeproteome;Cytoplasm;Cytoskeleton;Phosphoprotein;Referenceproteome			GO:0005737;GO:0005856;GO:0043226;GO:0043228;GO:0043229;GO:0043232;GO:0044424;GO:0044464
Q7TPM1	Protein PRRC2B	Prrc2b	RSKWNNWDPRRQRALSLSSADSTDAKRTQEE	S	415	0.8675	0.873933	0.821054	0.831733	*	0.000938219	3	-0.318565	-0.194405	-0.284451	-0.265807	9344500	14-3-3 domain binding motif;Akt kinase substrate motif;Calmodulin-dependent protein kinase II substrate motif;Casein kinase II substrate motif;G protein-coupled receptor kinase 1 substrate motif;MAPKAPK1 kinase substrate motif;p70 Ribosomal S6 kinase substrate motif;Phosphorylase kinase substrate motif;PKA kinase substrate motif;PKC kinase substrate motif					Alternativesplicing;Coiledcoil;Completeproteome;Isopeptidebond;Phosphoprotein;Referenceproteome;Ublconjugation
Q8BMS9	Ras association domain-containing protein 2	Rassf2	LKPVQEDTPQLMRTRSDVGVRRRGNVRTSSD	S	145	0.57476	0.429528	0.551126	0.501019	*	0.000431856	3	-0.912469	-1.21918	-0.859547	-0.997064	15652000	14-3-3 domain binding motif;AMP-activated protein kinase substrate motif;Calmodulin-dependent protein kinase I substrate motif;Calmodulin-dependent protein kinase II substrate motif;Calmodulin-dependent protein kinase IV substrate motif;Chk1 kinase substrate motif;HMGCoA Reductase kinase substrate motif;PKA kinase substrate motif;PKC kinase substrate motif	biological regulation;cell cycle;cellular process;cellular response to stimulus;regulation of biological process;regulation of cellular process;response to stimulus;signal transduction		cell part;cytoplasm;intracellular membrane-bounded organelle;intracellular organelle;intracellular part;membrane-bounded organelle;nucleus;organelle		Cellcycle;Completeproteome;Cytoplasm;Nucleus;Phosphoprotein;Referenceproteome;Tumorsuppressor	GO:0007049;GO:0007165;GO:0009987;GO:0050789;GO:0050794;GO:0050896;GO:0051716;GO:0065007		GO:0005634;GO:0005737;GO:0043226;GO:0043227;GO:0043229;GO:0043231;GO:0044424;GO:0044464
Q3V3V9	Leucine-rich repeat-containing protein 16C	Rltpr	KKPRSTRGPRPDLETSPGAAARARKSTLGDL	S	1008	0.84114	0.816234	0.830749	0.807846	*	< 0.0001	3	-0.363083	-0.292946	-0.267516	-0.307848	2190300	ERK1,2 kinase substrate motif;G protein-coupled receptor kinase 1 substrate motif;GSK-3, ERK1, ERK2, CDK5 substrate motif;WW domain binding motif					Alternativesplicing;Completeproteome;Leucine-richrepeat;Phosphoprotein;Referenceproteome;Repeat
P99027	60S acidic ribosomal protein P2	Rplp2	AAEEKKDEKKEESEESDDDMGFGLFD_____	S	105	0.73353	0.705576	0.725681	0.702824	*	< 0.0001	3	-0.560573	-0.503127	-0.462593	-0.508764	15681000	b-Adrenergic Receptor kinase substrate motif;Casein kinase II substrate motif;Pyruvate dehydrogenase kinase substrate motif	biosynthetic process;cellular biosynthetic process;cellular macromolecule biosynthetic process;cellular macromolecule metabolic process;cellular metabolic process;cellular process;macromolecule biosynthetic process;macromolecule metabolic process;metabolic process;translational elongation	structural constituent of ribosome;structural molecule activity	cell part;cytosolic large ribosomal subunit;intracellular organelle part;intracellular part;large ribosomal subunit;macromolecular complex;organelle part;ribonucleoprotein complex	Ribosome	Acetylation;Completeproteome;Directproteinsequencing;Phosphoprotein;Referenceproteome;Ribonucleoprotein;Ribosomalprotein	GO:0006414;GO:0008152;GO:0009058;GO:0009059;GO:0009987;GO:0034645;GO:0043170;GO:0044237;GO:0044249;GO:0044260	GO:0003735;GO:0005198	GO:0015934;GO:0022625;GO:0030529;GO:0032991;GO:0044422;GO:0044424;GO:0044446;GO:0044464
Q99PL5	Ribosome-binding protein 1	Rrbp1	PIATVPAMPQEKLASSPKDRKKKEKKVAKVE	S	135	0.55714	0.407472	0.316265	0.40487	*	0.00122698	3	-0.957389	-1.29523	-1.66079	-1.30447	13061000	Casein kinase II substrate motif;ERK1,2 kinase substrate motif;Growth associated histone HI kinase substrate motif;GSK-3, ERK1, ERK2, CDK5 substrate motif;MDC1 BRCT domain binding motif;PKA kinase substrate motif;PKC kinase substrate motif;Plk1 PBD domain binding motif;Pyruvate dehydrogenase kinase substrate motif;WW domain binding motif	biological regulation;cellular process;cellular response to stimulus;establishment of localization;establishment of protein localization;protein transport;regulation of biological process;regulation of cellular process;response to stimulus;signal transduction;transport		cell part;cytoplasmic part;endoplasmic reticulum part;integral to endoplasmic reticulum membrane;integral to membrane;integral to organelle membrane;intracellular organelle part;intracellular part;intrinsic to endoplasmic reticulum membrane;intrinsic to membrane;intrinsic to organelle membrane;membrane part;organelle part	Protein processing in endoplasmic reticulum	Alternativesplicing;Completeproteome;Endoplasmicreticulum;Membrane;Phosphoprotein;Proteintransport;Referenceproteome;Repeat;Translocation;Transmembrane;Transmembranehelix;Transport	GO:0006810;GO:0007165;GO:0009987;GO:0015031;GO:0045184;GO:0050789;GO:0050794;GO:0050896;GO:0051234;GO:0051716;GO:0065007		GO:0016021;GO:0030176;GO:0031224;GO:0031227;GO:0031300;GO:0031301;GO:0044422;GO:0044424;GO:0044425;GO:0044432;GO:0044444;GO:0044446;GO:0044464
P56183	Ribosomal RNA processing protein 1 homolog A	Rrp1	KKRLPKPQPQNKEAGSEAESSSADPGPGRKR	S	434	0.47828	0.201394	0.405852	0.330605	*	0.00153245	3	-1.17757	-2.31191	-1.30097	-1.59682	5071900	Casein kinase I substrate motif;Casein kinase II substrate motif;G protein-coupled receptor kinase 1 substrate motif;GSK3 kinase substrate motif;PKA kinase substrate motif	cellular macromolecule metabolic process;cellular metabolic process;cellular nitrogen compound metabolic process;cellular process;macromolecule metabolic process;metabolic process;ncRNA metabolic process;ncRNA processing;nitrogen compound metabolic process;nucleic acid metabolic process;nucleobase-containing compound metabolic process;primary metabolic process;RNA metabolic process;RNA processing…		cell part;intracellular non-membrane-bounded organelle;intracellular organelle;intracellular organelle part;intracellular part;macromolecular complex;non-membrane-bounded organelle;nuclear part;nucleolus;organelle;organelle part;preribosome;preribosome, small subunit precursor;ribonucleoprotein complex		Alternativesplicing;Completeproteome;Nucleus;Phosphoprotein;Referenceproteome;rRNAprocessing	GO:0006139;GO:0006364;GO:0006396;GO:0006807;GO:0008152;GO:0009987;GO:0016070;GO:0016072;GO:0034470;GO:0034641;GO:0034660;GO:0043170;GO:0044237;GO:0044238;GO:0044260;GO:0090304		GO:0005730;GO:0030529;GO:0030684;GO:0030688;GO:0032991;GO:0043226;GO:0043228;GO:0043229;GO:0043232;GO:0044422;GO:0044424;GO:0044428;GO:0044446;GO:0044464
Q02614	SAP30-binding protein	Sap30bp	PQELVASFSERVRNMSPDEIKIPPEPPGRCS	S	113	0.83246	0.766215	0.726696	0.753876	*	0.00188377	3	-0.378048	-0.384179	-0.460576	-0.407601	813290	14-3-3 domain binding motif;Akt kinase substrate motif;AMP-activated protein kinase substrate motif;Calmodulin-dependent protein kinase II substrate motif;Casein kinase II substrate motif;ERK1,2 kinase substrate motif;GSK-3, ERK1, ERK2, CDK5 substrate motif;HMGCoA Reductase kinase substrate motif;MAPKAPK1 kinase substrate motif;PKA kinase substrate motif;PKC kinase substrate motif;WW domain bindi…	apoptosis;biological regulation;biosynthetic process;cell death;cellular biosynthetic process;cellular macromolecule biosynthetic process;cellular macromolecule metabolic process;cellular metabolic process;cellular nitrogen compound metabolic process;cellular process;death;induction of apoptosis;induction of programmed cell death;macromolecule biosynthetic process;macromolecule metabolic process;…		cell part;cytoskeleton;intermediate filament cytoskeleton;intracellular membrane-bounded organelle;intracellular non-membrane-bounded organelle;intracellular organelle;intracellular part;membrane-bounded organelle;non-membrane-bounded organelle;nucleus;organelle		Apoptosis;Completeproteome;Nucleus;Phosphoprotein;Referenceproteome;Repressor;Transcription;Transcriptionregulation	GO:0006139;GO:0006351;GO:0006355;GO:0006807;GO:0006915;GO:0006917;GO:0008152;GO:0008219;GO:0009058;GO:0009059;GO:0009889;GO:0009987;GO:0010468;GO:0010556;GO:0010941;GO:0010942;GO:0012501;GO:0012502;GO:0016070;GO:0016265;GO:0019219;GO:0019222;GO:0031323;GO:0031326;GO:0032774;GO:0034641;GO:0034645;GO:0042981;GO:0043065;GO:0043067;GO:0043068;GO:0043170;GO:0044237;GO:0044238;GO:0044249;GO:0044260;GO:…		GO:0005634;GO:0005856;GO:0043226;GO:0043227;GO:0043228;GO:0043229;GO:0043231;GO:0043232;GO:0044424;GO:0044464;GO:0045111
Q9EQU5	Protein SET	Set	PKKPRPAAAPKLEDKSASPGLPKGEKEQQEA	S	28	0.76013	0.671914	0.633404	0.668711	*	0.00114791	3	-0.509182	-0.573653	-0.658803	-0.580546	5483800	Casein kinase I substrate motif;Casein kinase II substrate motif	biological regulation;cellular component assembly;cellular component assembly at cellular level;cellular component organization;cellular component organization at cellular level;cellular component organization or biogenesis;cellular component organization or biogenesis at cellular level;cellular macromolecular complex assembly;cellular macromolecular complex subunit organization;cellular process;…	binding;DNA binding;nucleic acid binding	cell part;cytoplasmic part;cytosol;endoplasmic reticulum;intracellular membrane-bounded organelle;intracellular organelle;intracellular organelle part;intracellular part;macromolecular complex;membrane-bounded organelle;nuclear part;nucleoplasm;nucleus;organelle;organelle part;perinuclear region of cytoplasm;protein complex		Acetylation;Alternativesplicing;Chaperone;Completeproteome;Cytoplasm;DNA-binding;Endoplasmicreticulum;Isopeptidebond;Methylation;Nucleus;Phosphoprotein;Referenceproteome;Ublconjugation	GO:0006325;GO:0006334;GO:0006355;GO:0006996;GO:0009889;GO:0009890;GO:0009892;GO:0009987;GO:0010468;GO:0010556;GO:0010558;GO:0010605;GO:0010629;GO:0010941;GO:0016043;GO:0019219;GO:0019222;GO:0022607;GO:0031323;GO:0031324;GO:0031326;GO:0031327;GO:0034621;GO:0034622;GO:0034728;GO:0042981;GO:0043066;GO:0043067;GO:0043069;GO:0043523;GO:0043524;GO:0043933;GO:0045892;GO:0045934;GO:0048519;GO:0048523;GO:…	GO:0003676;GO:0003677;GO:0005488	GO:0005634;GO:0005654;GO:0005783;GO:0005829;GO:0032991;GO:0043226;GO:0043227;GO:0043229;GO:0043231;GO:0043234;GO:0044422;GO:0044424;GO:0044428;GO:0044444;GO:0044446;GO:0044464;GO:0048471
Q60520	Paired amphipathic helix protein Sin3a	Sin3a	HHFIPDLLFAQRGDLSDVEEEEEEEMDVDEA	S	833	0.65308	0.594254	0.637819	0.611631	*	< 0.0001	3	-0.728169	-0.750849	-0.64878	-0.709266	35947000	Casein kinase II substrate motif	activation of immune response;activation of innate immune response;aging;biological regulation;biosynthetic process;carbohydrate homeostasis;cellular biosynthetic process;cellular chemical homeostasis;cellular glucose homeostasis;cellular homeostasis;cellular localization;cellular macromolecule biosynthetic process;cellular macromolecule localization;cellular macromolecule metabolic process;cellu…	binding;catalytic activity;chromatin binding;deacetylase activity;DNA binding;hydrolase activity;nucleic acid binding;nucleic acid binding transcription factor activity;protein binding transcription factor activity;protein deacetylase activity;RNA polymerase II transcription cofactor activity;RNA polymerase II transcription corepressor activity;RNA polymerase II transcription factor binding trans…	cell part;chromatin remodeling complex;chromosomal part;histone deacetylase complex;intracellular non-membrane-bounded organelle;intracellular organelle;intracellular organelle part;intracellular part;kinetochore;macromolecular complex;non-membrane-bounded organelle;nuclear chromosome part;nuclear part;nucleolus;nucleoplasm part;organelle;organelle part;protein complex;Sin3 complex;Sin3-type comp…	Huntington's disease	3D-structure;Acetylation;Alternativesplicing;Coiledcoil;Completeproteome;Nucleus;Phosphoprotein;Referenceproteome;Repeat;Repressor;Transcription;Transcriptionregulation;Ublconjugation	GO:0001678;GO:0001701;GO:0002218;GO:0002230;GO:0002253;GO:0002376;GO:0002682;GO:0002684;GO:0002697;GO:0002831;GO:0006139;GO:0006259;GO:0006260;GO:0006355;GO:0006357;GO:0006807;GO:0006950;GO:0006979;GO:0007346;GO:0007568;GO:0008104;GO:0008152;GO:0009058;GO:0009059;GO:0009636;GO:0009719;GO:0009743;GO:0009746;GO:0009749;GO:0009790;GO:0009792;GO:0009889;GO:0009891;GO:0009893;GO:0009987;GO:0010033;GO:…	GO:0000988;GO:0000989;GO:0001071;GO:0001076;GO:0001104;GO:0001106;GO:0001191;GO:0003676;GO:0003677;GO:0003682;GO:0003700;GO:0003712;GO:0003714;GO:0003824;GO:0005488;GO:0016787;GO:0019213;GO:0033558	GO:0000118;GO:0000776;GO:0005667;GO:0005730;GO:0016580;GO:0016585;GO:0017053;GO:0032991;GO:0043226;GO:0043228;GO:0043229;GO:0043232;GO:0043234;GO:0044422;GO:0044424;GO:0044427;GO:0044428;GO:0044446;GO:0044451;GO:0044454;GO:0044464;GO:0070822
P53986	Monocarboxylate transporter 1	Slc16a1	KAEEKQKREGKEDEASTDVDEKPKETMKAAQ	S	461	0.68595	0.580836	0.512905	0.573771	*	0.00127412	3	-0.657325	-0.783796	-0.963236	-0.801453	4067100	Casein kinase I substrate motif		active transmembrane transporter activity;carboxylic acid transmembrane transporter activity;monocarboxylic acid transmembrane transporter activity;organic acid transmembrane transporter activity;secondary active monocarboxylate transmembrane transporter activity;secondary active transmembrane transporter activity;substrate-specific transmembrane transporter activity;substrate-specific transporte…	cell part;cytoplasmic part;integral to membrane;intracellular membrane-bounded organelle;intracellular organelle;intracellular part;intrinsic to membrane;membrane;membrane part;membrane-bounded organelle;mitochondrion;organelle;plasma membrane		Cellmembrane;Completeproteome;Membrane;Phosphoprotein;Referenceproteome;Symport;Transmembrane;Transmembranehelix;Transport		GO:0005215;GO:0005342;GO:0008028;GO:0015291;GO:0015293;GO:0015355;GO:0022804;GO:0022857;GO:0022891;GO:0022892;GO:0046943	GO:0005739;GO:0005886;GO:0016020;GO:0016021;GO:0031224;GO:0043226;GO:0043227;GO:0043229;GO:0043231;GO:0044424;GO:0044425;GO:0044444;GO:0044464
Q8CH25	SAFB-like transcription modulator	Sltm	KYGKVLSAKVVTNARSPGAKCYGIVTMSSST	S	421	0.71339	0.719941	0.650357	0.67588	*	0.000161239	3	-0.600738	-0.474049	-0.620697	-0.565161	4151100	ERK1,2 kinase substrate motif;Growth associated histone HI kinase substrate motif;GSK-3, ERK1, ERK2, CDK5 substrate motif;WW domain binding motif	apoptosis;biological regulation;biosynthetic process;cell death;cellular biosynthetic process;cellular macromolecule biosynthetic process;cellular macromolecule metabolic process;cellular metabolic process;cellular nitrogen compound metabolic process;cellular process;death;macromolecule biosynthetic process;macromolecule metabolic process;metabolic process;nitrogen compound metabolic process;nucl…	binding;nucleic acid binding;nucleotide binding;RNA binding	cell part;intracellular membrane-bounded organelle;intracellular organelle;intracellular part;membrane-bounded organelle;nucleus;organelle		Acetylation;Alternativesplicing;Apoptosis;Coiledcoil;Completeproteome;Nucleus;Phosphoprotein;Referenceproteome;Repressor;RNA-binding;Transcription;Transcriptionregulation	GO:0006139;GO:0006351;GO:0006355;GO:0006807;GO:0006915;GO:0008152;GO:0008219;GO:0009058;GO:0009059;GO:0009889;GO:0009987;GO:0010468;GO:0010556;GO:0012501;GO:0016070;GO:0016265;GO:0019219;GO:0019222;GO:0031323;GO:0031326;GO:0032774;GO:0034641;GO:0034645;GO:0043170;GO:0044237;GO:0044238;GO:0044249;GO:0044260;GO:0050789;GO:0050794;GO:0051171;GO:0051252;GO:0060255;GO:0065007;GO:0080090;GO:0090304;GO:…	GO:0000166;GO:0003676;GO:0003723;GO:0005488	GO:0005634;GO:0043226;GO:0043227;GO:0043229;GO:0043231;GO:0044424;GO:0044464
Q8CH25	SAFB-like transcription modulator	Sltm	RESRVERPERSGREVSGHTVRGAPPGNRSSA	S	906	0.82356	0.773943	0.78126	0.772107	*	0.000179873	3	-0.393555	-0.369701	-0.356125	-0.373127	3614000	14-3-3 domain binding motif;Calmodulin-dependent protein kinase II substrate motif;Casein kinase II substrate motif;PKA kinase substrate motif;PKC epsilon kinase substrate motif;PKC kinase substrate motif	apoptosis;biological regulation;biosynthetic process;cell death;cellular biosynthetic process;cellular macromolecule biosynthetic process;cellular macromolecule metabolic process;cellular metabolic process;cellular nitrogen compound metabolic process;cellular process;death;macromolecule biosynthetic process;macromolecule metabolic process;metabolic process;nitrogen compound metabolic process;nucl…	binding;nucleic acid binding;nucleotide binding;RNA binding	cell part;intracellular membrane-bounded organelle;intracellular organelle;intracellular part;membrane-bounded organelle;nucleus;organelle		Acetylation;Alternativesplicing;Apoptosis;Coiledcoil;Completeproteome;Nucleus;Phosphoprotein;Referenceproteome;Repressor;RNA-binding;Transcription;Transcriptionregulation	GO:0006139;GO:0006351;GO:0006355;GO:0006807;GO:0006915;GO:0008152;GO:0008219;GO:0009058;GO:0009059;GO:0009889;GO:0009987;GO:0010468;GO:0010556;GO:0012501;GO:0016070;GO:0016265;GO:0019219;GO:0019222;GO:0031323;GO:0031326;GO:0032774;GO:0034641;GO:0034645;GO:0043170;GO:0044237;GO:0044238;GO:0044249;GO:0044260;GO:0050789;GO:0050794;GO:0051171;GO:0051252;GO:0060255;GO:0065007;GO:0080090;GO:0090304;GO:…	GO:0000166;GO:0003676;GO:0003723;GO:0005488	GO:0005634;GO:0043226;GO:0043227;GO:0043229;GO:0043231;GO:0044424;GO:0044464
Q52KI8	Serine/arginine repetitive matrix protein 1	Srrm1	KRTSSPPRKTRRLSPSASPPRRRHRPSSPAT	S	389	0.83641	0.789778	0.727457	0.762995	*	0.00240781	3	-0.371218	-0.340481	-0.459066	-0.390255	32196000	Casein kinase II substrate motif;DNA dependent Protein kinase substrate motif;G protein-coupled receptor kinase 1 substrate motif	cellular macromolecule metabolic process;cellular metabolic process;cellular nitrogen compound metabolic process;cellular process;macromolecule metabolic process;metabolic process;mRNA metabolic process;mRNA processing;nitrogen compound metabolic process;nuclear mRNA splicing, via spliceosome;nucleic acid metabolic process;nucleobase-containing compound metabolic process;primary metabolic process…	binding;DNA binding;nucleic acid binding	catalytic step 2 spliceosome;cell part;intracellular organelle part;intracellular part;macromolecular complex;nuclear body;nuclear matrix;nuclear part;nuclear speck;nucleoplasm part;organelle part;ribonucleoprotein complex;spliceosomal complex	mRNA surveillance pathway;RNA transport	Acetylation;Alternativesplicing;Completeproteome;DNA-binding;mRNAprocessing;mRNAsplicing;Nucleus;Phosphoprotein;Referenceproteome;RNA-binding;Spliceosome	GO:0000375;GO:0000377;GO:0000398;GO:0006139;GO:0006396;GO:0006397;GO:0006807;GO:0008152;GO:0008380;GO:0009987;GO:0016070;GO:0016071;GO:0034641;GO:0043170;GO:0044237;GO:0044238;GO:0044260;GO:0090304	GO:0003676;GO:0003677;GO:0005488	GO:0005681;GO:0016363;GO:0016604;GO:0016607;GO:0030529;GO:0032991;GO:0044422;GO:0044424;GO:0044428;GO:0044446;GO:0044451;GO:0044464;GO:0071013
P83093	Stromal interaction molecule 2	Stim2	NDSKPVQEASNVSRVSSIPHDLCHNGEKSKK	S	718	0.87104	0.785559	0.843388	0.811009	*	0.00270278	3	-0.31269	-0.348209	-0.245732	-0.30221	9298800	PKA kinase substrate motif;PKC kinase substrate motif	activation of store-operated calcium channel activity;biological regulation;calcium ion homeostasis;cation homeostasis;cellular calcium ion homeostasis;cellular cation homeostasis;cellular chemical homeostasis;cellular divalent inorganic cation homeostasis;cellular homeostasis;cellular ion homeostasis;cellular metal ion homeostasis;cellular process;chemical homeostasis;divalent inorganic cation h…	binding;calcium channel activity;calcium channel regulator activity;calcium ion binding;cation binding;cation channel activity;cation transmembrane transporter activity;channel activity;channel regulator activity;gated channel activity;ion binding;ion channel activity;ion transmembrane transporter activity;ligand-gated channel activity;ligand-gated ion channel activity;metal ion binding;passive t…	cell part;cytoplasmic part;endoplasmic reticulum;endoplasmic reticulum membrane;endoplasmic reticulum part;integral to membrane;intracellular membrane-bounded organelle;intracellular organelle;intracellular organelle part;intracellular part;intrinsic to membrane;membrane;membrane part;membrane-bounded organelle;organelle;organelle membrane;organelle part;plasma membrane		Calcium;Calciumtransport;Coiledcoil;Completeproteome;Endoplasmicreticulum;Glycoprotein;Iontransport;Membrane;Phosphoprotein;Referenceproteome;Signal;Transmembrane;Transmembranehelix;Transport	GO:0006873;GO:0006874;GO:0006875;GO:0009987;GO:0010959;GO:0019725;GO:0022898;GO:0030003;GO:0032234;GO:0032236;GO:0032237;GO:0032409;GO:0032411;GO:0032412;GO:0032414;GO:0032879;GO:0034762;GO:0034765;GO:0042592;GO:0043269;GO:0043270;GO:0044093;GO:0048518;GO:0048878;GO:0050789;GO:0050794;GO:0050801;GO:0051049;GO:0051050;GO:0051924;GO:0051928;GO:0055065;GO:0055074;GO:0055080;GO:0055082;GO:0065007;GO:…	GO:0005215;GO:0005216;GO:0005246;GO:0005261;GO:0005262;GO:0005488;GO:0005509;GO:0008324;GO:0015075;GO:0015267;GO:0015276;GO:0015279;GO:0016247;GO:0022803;GO:0022834;GO:0022836;GO:0022838;GO:0022857;GO:0022891;GO:0022892;GO:0043167;GO:0043169;GO:0046872	GO:0005783;GO:0005789;GO:0005886;GO:0016020;GO:0016021;GO:0031090;GO:0031224;GO:0043226;GO:0043227;GO:0043229;GO:0043231;GO:0044422;GO:0044424;GO:0044425;GO:0044432;GO:0044444;GO:0044446;GO:0044464
Q8BG09	Transmembrane protein 184B	Tmem184b	GPTWRGGTHSLSRSHSLSGARDNEKTLLLSS	S	388	0.88828	0.840271	0.826993	0.829408	*	0.00135016	3	-0.284414	-0.251073	-0.274053	-0.269847	7716300	14-3-3 domain binding motif;Calmodulin-dependent protein kinase II alpha substrate motif;Calmodulin-dependent protein kinase II substrate motif;Calmodulin-dependent protein kinase IV substrate motif;Casein kinase II substrate motif;Chk1 kinase substrate motif;G protein-coupled receptor kinase 1 substrate motif;MAPKAPK2 kinase substrate motif;Phosphorylase kinase substrate motif;PKA kinase substra…			cell part;integral to membrane;intrinsic to membrane;membrane part		Completeproteome;Membrane;Phosphoprotein;Referenceproteome;Transmembrane;Transmembranehelix			GO:0016021;GO:0031224;GO:0044425;GO:0044464
Q9CYZ2	Tumor protein D54	Tpd52l2	HSISMPVMRNSATFKSFEDRVGTIKSKVVGG	S	180	0.61053	0.549071	0.52529	0.545996	*	< 0.0001	3	-0.825366	-0.864936	-0.928814	-0.873039	72450000	Casein kinase II substrate motif;Pyruvate dehydrogenase kinase substrate motif			cell part;cytoplasmic part;intracellular part;perinuclear region of cytoplasm		Acetylation;Coiledcoil;Completeproteome;Phosphoprotein;Referenceproteome			GO:0044424;GO:0044444;GO:0044464;GO:0048471
G5E870	E3 ubiquitin-protein ligase TRIP12	Trip12	VGGKRGRAQTAPTKTSPRNAKKHDELWHDGV	S	1460	0.10757	0.0613977	0.00874299	0.0376512	*	< 0.0001	3	-3.33015	-4.02567	-6.83766	-4.73116	27935000	ERK1,2 kinase substrate motif;G protein-coupled receptor kinase 1 substrate motif;Growth associated histone HI kinase substrate motif;GSK-3, ERK1, ERK2, CDK5 substrate motif;PKA kinase substrate motif;PKC kinase substrate motif;WW domain binding motif	biological regulation;cellular macromolecule metabolic process;cellular metabolic process;cellular nitrogen compound metabolic process;cellular process;cellular protein metabolic process;cellular response to stimulus;cellular response to stress;developmental process;DNA metabolic process;DNA repair;embryo development;macromolecule metabolic process;macromolecule modification;metabolic process;neg…	acid-amino acid ligase activity;catalytic activity;ligase activity;ligase activity, forming carbon-nitrogen bonds;small conjugating protein ligase activity;ubiquitin-protein ligase activity	cell part;cytoplasm;intracellular organelle part;intracellular part;nuclear part;nucleoplasm;organelle part	Ubiquitin mediated proteolysis	Acetylation;Completeproteome;DNAdamage;DNArepair;Ligase;Nucleus;Phosphoprotein;Referenceproteome;Ublconjugationpathway	GO:0006139;GO:0006259;GO:0006281;GO:0006282;GO:0006464;GO:0006807;GO:0006950;GO:0006974;GO:0008152;GO:0009790;GO:0009892;GO:0009987;GO:0010605;GO:0016567;GO:0019219;GO:0019222;GO:0019538;GO:0031323;GO:0031324;GO:0032446;GO:0032502;GO:0033554;GO:0034641;GO:0042787;GO:0043170;GO:0043412;GO:0044237;GO:0044238;GO:0044260;GO:0044267;GO:0045738;GO:0045934;GO:0048519;GO:0048523;GO:0048583;GO:0048585;GO:…	GO:0003824;GO:0004842;GO:0016874;GO:0016879;GO:0016881;GO:0019787	GO:0005654;GO:0005737;GO:0044422;GO:0044424;GO:0044428;GO:0044446;GO:0044464
G5E870	E3 ubiquitin-protein ligase TRIP12	Trip12	AKLASLRKSTKKRSESPPAELPSLRRSTRQK	S	312	0.80062	0.781671	0.779179	0.766726	*	< 0.0001	3	-0.434311	-0.355367	-0.359973	-0.383217	40641000	14-3-3 domain binding motif;Akt kinase substrate motif;b-Adrenergic Receptor kinase substrate motif;Calmodulin-dependent protein kinase II substrate motif;ERK1,2 kinase substrate motif;GSK-3, ERK1, ERK2, CDK5 substrate motif;MAPKAPK1 kinase substrate motif;PKA kinase substrate motif;PKC kinase substrate motif;WW domain binding motif	biological regulation;cellular macromolecule metabolic process;cellular metabolic process;cellular nitrogen compound metabolic process;cellular process;cellular protein metabolic process;cellular response to stimulus;cellular response to stress;developmental process;DNA metabolic process;DNA repair;embryo development;macromolecule metabolic process;macromolecule modification;metabolic process;neg…	acid-amino acid ligase activity;catalytic activity;ligase activity;ligase activity, forming carbon-nitrogen bonds;small conjugating protein ligase activity;ubiquitin-protein ligase activity	cell part;cytoplasm;intracellular organelle part;intracellular part;nuclear part;nucleoplasm;organelle part	Ubiquitin mediated proteolysis	Acetylation;Completeproteome;DNAdamage;DNArepair;Ligase;Nucleus;Phosphoprotein;Referenceproteome;Ublconjugationpathway	GO:0006139;GO:0006259;GO:0006281;GO:0006282;GO:0006464;GO:0006807;GO:0006950;GO:0006974;GO:0008152;GO:0009790;GO:0009892;GO:0009987;GO:0010605;GO:0016567;GO:0019219;GO:0019222;GO:0019538;GO:0031323;GO:0031324;GO:0032446;GO:0032502;GO:0033554;GO:0034641;GO:0042787;GO:0043170;GO:0043412;GO:0044237;GO:0044238;GO:0044260;GO:0044267;GO:0045738;GO:0045934;GO:0048519;GO:0048523;GO:0048583;GO:0048585;GO:…	GO:0003824;GO:0004842;GO:0016874;GO:0016879;GO:0016881;GO:0019787	GO:0005654;GO:0005737;GO:0044422;GO:0044424;GO:0044428;GO:0044446;GO:0044464
Q8R3F9	Speckle targeted PIP5K1A-regulated poly(A) polymerase	Tut1	QGTKRRRSEGARIKDSPLGGVNKRQRLGGQE	S	655	0.88344	0.816803	0.82481	0.819396	*	0.0016598	3	-0.292296	-0.291941	-0.277866	-0.287368	388510	b-Adrenergic Receptor kinase substrate motif;ERK1,2 kinase substrate motif;GSK-3, ERK1, ERK2, CDK5 substrate motif;PKA kinase substrate motif;PKC kinase substrate motif;WW domain binding motif	cellular macromolecule metabolic process;cellular metabolic process;cellular nitrogen compound metabolic process;cellular process;macromolecule metabolic process;metabolic process;mRNA 3'-end processing;mRNA cleavage;mRNA metabolic process;mRNA polyadenylation;mRNA processing;ncRNA metabolic process;ncRNA processing;nitrogen compound metabolic process;nucleic acid metabolic process;nucleic acid p…	adenyl nucleotide binding;adenyl ribonucleotide binding;adenylyltransferase activity;ATP binding;binding;catalytic activity;cation binding;ion binding;metal ion binding;mRNA 3'-UTR binding;mRNA binding;nucleic acid binding;nucleotide binding;nucleotidyltransferase activity;polynucleotide adenylyltransferase activity;purine nucleotide binding;purine ribonucleoside triphosphate binding;purine ribon…	cell part;intracellular non-membrane-bounded organelle;intracellular organelle;intracellular organelle part;intracellular part;non-membrane-bounded organelle;nuclear body;nuclear part;nuclear speck;nucleolus;nucleoplasm part;organelle;organelle part		Alternativesplicing;ATP-binding;Completeproteome;Magnesium;Manganese;Metal-binding;mRNAprocessing;Nucleotide-binding;Nucleotidyltransferase;Nucleus;Phosphoprotein;Referenceproteome;RNA-binding;Transferase;Zinc;Zinc-finger	GO:0006139;GO:0006378;GO:0006379;GO:0006396;GO:0006397;GO:0006807;GO:0008152;GO:0009987;GO:0016070;GO:0016071;GO:0016073;GO:0016180;GO:0031123;GO:0031124;GO:0034470;GO:0034641;GO:0034660;GO:0043170;GO:0043631;GO:0044237;GO:0044238;GO:0044260;GO:0090304;GO:0090305	GO:0000166;GO:0003676;GO:0003723;GO:0003729;GO:0003730;GO:0003824;GO:0004652;GO:0005488;GO:0005524;GO:0016740;GO:0016772;GO:0016779;GO:0017076;GO:0030554;GO:0032553;GO:0032555;GO:0032559;GO:0035639;GO:0043167;GO:0043169;GO:0046872;GO:0050265;GO:0070566;GO:0070569	GO:0005730;GO:0016604;GO:0016607;GO:0043226;GO:0043228;GO:0043229;GO:0043232;GO:0044422;GO:0044424;GO:0044428;GO:0044446;GO:0044451;GO:0044464
E9Q784		Zc3h13	EVSPEVVRSKLSPSPSLRKSSKSPKRKSSPK	S	211	0.71544	0.54305	0.599853	0.599464	*	0.00168831	3	-0.596598	-0.880844	-0.73732	-0.738254	2513200	DNA dependent Protein kinase substrate motif;G protein-coupled receptor kinase 1 substrate motif;GSK3 kinase substrate motif;MAPKAPK2 kinase substrate motif;PKA kinase substrate motif;PKC kinase substrate motif		binding;cation binding;ion binding;metal ion binding;nucleic acid binding;transition metal ion binding;zinc ion binding			Completeproteome;Metal-binding;Referenceproteome		GO:0003676;GO:0005488;GO:0008270;GO:0043167;GO:0043169;GO:0046872;GO:0046914
